# Supplementary material for: bub1 as a potential oncogene and a prognostic biomarker for neuroblastoma
Source: Front Oncol. 2022 Sep 27;12:988415. doi: 10.3389/fonc.2022.988415 (PMC9552328; doi:10.3389/fonc.2022.988415)
Supplement: Supplementary file 1 [file DataSheet_1.xlsx]

## Sheet: Supplymentary Table S1
Supplementary Table S1. GO analysis detailed results.
ONTOLOGY	ID	Description	GeneRatio	BgRatio	pvalue	p.adjust	qvalue	geneID	Count
BP	GO:0006260	DNA replication	96/765	273/18670	9.73017e-64	3.74612e-60	3.13414e-60	ESCO2/CCNA2/EXO1/CDK1/DTL/MCM10/BRIP1/BLM/BRCA2/FBXO5/RAD51/CDC45/POLQ/GINS1/PCNA/RRM2/MCM6/TIMELESS/GINS2/GMNN/MCM3/POLE2/DSCC1/BRCA1/CDC6/E2F8/RFC4/MCM2/RNASEH2A/ORC6/MCM4/MMS22L/CHEK1/WDHD1/DBF4/MCM5/CLSPN/MCM8/POLE/POLA2/RFC3/EME1/PRIM1/E2F7/CHAF1A/RFC5/ATAD5/ORC1/FEN1/TOPBP1/RFWD3/MCM7/DNA2/GEN1/POLA1/PRIM2/LIG1/CHAF1B/CHEK2/MSH6/RRM1/CDK2/FANCM/CCNE2/NASP/CDC7/CDT1/SMC1A/RBBP8/POLH/RFC2/DDX…	96
BP	GO:0007059	chromosome segregation	94/765	321/18670	2.92556e-54	5.63171e-51	4.7117e-51	BUB1/NCAPH/TTK/CDCA2/KIF14/DLGAP5/KIF23/CENPF/HJURP/NCAPG/BUB1B/ESCO2/KIF4A/SKA3/NDC80/NUSAP1/MKI67/CCNB1/KIF18A/NUF2/ECT2/CENPK/RACGAP1/TOP2A/KIF2C/KIFC1/PTTG1/BRIP1/PLK1/FBXO5/FAM83D/CENPE/SPC25/PRC1/CDC20/BIRC5/NCAPD2/ZWINT/MAD2L1/DSCC1/OIP5/ESPL1/SKA1/SMC4/AURKB/BRCA1/SPAG5/CDC6/DSN1/TRIP13/FANCD2/TACC3/CDCA5/CDCA8/EME1/KIF22/KIF18B/NEK2/SMC2/FEN1/GEN1/INCENP/SRPK1/RAD18/FANCM/RCC1/NCAPD3/CCN…	94
BP	GO:0000280	nuclear division	102/765	407/18670	8.00702e-52	1.02757e-48	8.59701e-49	BUB1/NCAPH/TPX2/TTK/ASPM/KIF14/DLGAP5/KIF23/CENPF/KIF11/NCAPG/BUB1B/ANLN/KIF4A/NDC80/NUSAP1/MKI67/CCNB1/KIF18A/NUF2/CENPK/RACGAP1/TOP2A/UBE2C/KIF2C/KIFC1/PTTG1/BRIP1/PLK1/BRCA2/FBXO5/MYBL2/CENPE/RAD51/PRC1/CDC20/BIRC5/NCAPD2/ZWINT/MAD2L1/DSCC1/ESPL1/SMC4/AURKA/AURKB/SPAG5/CDC6/DSN1/TRIP13/FANCD2/FANCA/CHEK1/TACC3/RAD54L/CDC25C/CDCA5/KNTC1/KIF20B/CDCA8/EME1/KIF22/MND1/FBXO43/KIF18B/NEK2/SMC2/RAD54…	102
BP	GO:0006261	DNA-dependent DNA replication	66/765	151/18670	3.779e-51	3.63729e-48	3.04309e-48	MCM10/BLM/BRCA2/FBXO5/RAD51/CDC45/POLQ/GINS1/PCNA/MCM6/TIMELESS/GINS2/GMNN/MCM3/POLE2/DSCC1/CDC6/E2F8/RFC4/MCM2/ORC6/MCM4/MMS22L/WDHD1/DBF4/MCM5/POLE/POLA2/RFC3/EME1/PRIM1/E2F7/RFC5/ATAD5/ORC1/FEN1/RFWD3/MCM7/DNA2/GEN1/POLA1/PRIM2/LIG1/CHEK2/MSH6/CDK2/FANCM/CCNE2/CDC7/CDT1/SMC1A/RFC2/DDX11/POLD1/POLD2/BAZ1A/ZRANB3/TIPIN/SMC3/GINS4/RECQL4/DONSON/LIG3/POLD3/GINS3/ORC2	66
BP	GO:0048285	organelle fission	102/765	449/18670	1.58496e-47	1.22042e-44	1.02105e-44	BUB1/NCAPH/TPX2/TTK/ASPM/KIF14/DLGAP5/KIF23/CENPF/KIF11/NCAPG/BUB1B/ANLN/KIF4A/NDC80/NUSAP1/MKI67/CCNB1/KIF18A/NUF2/CENPK/RACGAP1/TOP2A/UBE2C/KIF2C/KIFC1/PTTG1/BRIP1/PLK1/BRCA2/FBXO5/MYBL2/CENPE/RAD51/PRC1/CDC20/BIRC5/NCAPD2/ZWINT/MAD2L1/DSCC1/ESPL1/SMC4/AURKA/AURKB/SPAG5/CDC6/DSN1/TRIP13/FANCD2/FANCA/CHEK1/TACC3/RAD54L/CDC25C/CDCA5/KNTC1/KIF20B/CDCA8/EME1/KIF22/MND1/FBXO43/KIF18B/NEK2/SMC2/RAD54…	102
BP	GO:0140014	mitotic nuclear division	79/765	264/18670	2.21768e-46	1.42301e-43	1.19054e-43	BUB1/NCAPH/TPX2/TTK/KIF14/DLGAP5/KIF23/CENPF/KIF11/NCAPG/BUB1B/ANLN/KIF4A/NDC80/NUSAP1/MKI67/CCNB1/KIF18A/NUF2/CENPK/RACGAP1/UBE2C/KIF2C/KIFC1/PTTG1/PLK1/FBXO5/MYBL2/CENPE/PRC1/CDC20/BIRC5/NCAPD2/ZWINT/MAD2L1/DSCC1/ESPL1/SMC4/AURKA/AURKB/SPAG5/CDC6/DSN1/TRIP13/CHEK1/TACC3/CDC25C/CDCA5/KNTC1/KIF20B/CDCA8/KIF22/KIF18B/NEK2/SMC2/GEN1/INCENP/CHEK2/RCC1/NCAPD3/CDK5RAP2/PKMYT1/CDT1/SMC1A/MTBP/XRCC3/NUP…	79
BP	GO:0098813	nuclear chromosome segregation	74/765	262/18670	1.61829e-41	8.90062e-39	7.44659e-39	BUB1/NCAPH/TTK/KIF14/DLGAP5/KIF23/CENPF/NCAPG/BUB1B/ESCO2/KIF4A/NDC80/NUSAP1/CCNB1/KIF18A/NUF2/ECT2/CENPK/RACGAP1/TOP2A/KIF2C/KIFC1/PTTG1/BRIP1/PLK1/FBXO5/FAM83D/CENPE/PRC1/CDC20/NCAPD2/ZWINT/MAD2L1/DSCC1/ESPL1/SMC4/AURKB/SPAG5/CDC6/DSN1/TRIP13/FANCD2/TACC3/CDCA5/CDCA8/EME1/KIF22/KIF18B/NEK2/SMC2/FEN1/GEN1/INCENP/FANCM/NCAPD3/CCNE2/CDK5RAP2/CDT1/SMC1A/CTCF/DDX11/CENPQ/TEX15/XRCC3/NUP62/PSRC1/RCC2…	74
BP	GO:0071103	DNA conformation change	85/765	364/18670	1.43955e-40	6.92781e-38	5.79606e-38	NCAPH/HJURP/NCAPG/NUSAP1/CCNB1/CDK1/CENPK/TOP2A/BRIP1/BLM/RAD51/CENPI/CDC45/POLQ/GINS1/ERCC6L/MCM6/GINS2/NCAPD2/MCM3/DSCC1/OIP5/SMC4/RFC4/MCM2/HMGB2/MCM4/RAD54L/CENPA/CENPO/MCM5/CDCA5/MCM8/CENPH/HELLS/RFC3/NCAPG2/ASF1B/CHAF1A/RFC5/SMC2/RAD54B/CENPM/CENPL/MCM7/DNA2/DNMT1/CHAF1B/HMGB3/SRPK1/RAD18/NCAPD3/NASP/CENPV/TRIM28/CENPN/CTCF/RFC2/DDX11/ITGB3BP/CENPQ/CENPP/G3BP1/ANP32B/DHX9/SET/RUVBL1/ZRANB3/…	85
BP	GO:0000819	sister chromatid segregation	63/765	189/18670	2.83115e-40	1.21111e-37	1.01326e-37	BUB1/NCAPH/TTK/KIF14/DLGAP5/KIF23/CENPF/NCAPG/BUB1B/ESCO2/KIF4A/NDC80/NUSAP1/CCNB1/KIF18A/NUF2/CENPK/RACGAP1/TOP2A/KIF2C/KIFC1/PTTG1/PLK1/FBXO5/CENPE/PRC1/CDC20/NCAPD2/ZWINT/MAD2L1/DSCC1/ESPL1/SMC4/AURKB/SPAG5/CDC6/DSN1/TRIP13/TACC3/CDCA5/CDCA8/KIF22/KIF18B/NEK2/SMC2/FEN1/GEN1/INCENP/NCAPD3/CDK5RAP2/CDT1/SMC1A/CTCF/DDX11/XRCC3/NUP62/PSRC1/SMC3/PHB2/RAD51C/RAN/ANAPC1/HNRNPU	63
BP	GO:0044786	cell cycle DNA replication	41/765	71/18670	1.36699e-38	5.26293e-36	4.40316e-36	BRCA2/FBXO5/RAD51/CDC45/GINS1/PCNA/MCM6/GMNN/MCM3/POLE2/E2F8/RFC4/MCM2/MCM4/DBF4/MCM5/POLE/POLA2/RFC3/PRIM1/E2F7/RFC5/ATAD5/FEN1/MCM7/DNA2/POLA1/PRIM2/LIG1/CHEK2/MSH6/CDC7/CDT1/SMC1A/RFC2/POLD1/POLD2/TIPIN/SMC3/DONSON/POLD3	41
BP	GO:0000070	mitotic sister chromatid segregation	55/765	151/18670	1.25938e-37	4.40781e-35	3.68774e-35	BUB1/NCAPH/TTK/KIF14/DLGAP5/KIF23/CENPF/NCAPG/BUB1B/KIF4A/NDC80/NUSAP1/CCNB1/KIF18A/NUF2/CENPK/RACGAP1/KIF2C/KIFC1/PTTG1/PLK1/FBXO5/CENPE/PRC1/CDC20/NCAPD2/ZWINT/MAD2L1/DSCC1/ESPL1/SMC4/AURKB/SPAG5/CDC6/DSN1/TRIP13/TACC3/CDCA5/CDCA8/KIF22/KIF18B/NEK2/SMC2/GEN1/INCENP/NCAPD3/CDK5RAP2/CDT1/SMC1A/XRCC3/NUP62/PSRC1/RAN/ANAPC1/HNRNPU	55
BP	GO:1901987	regulation of cell cycle phase transition	90/765	480/18670	7.27221e-35	2.33317e-32	1.95202e-32	BUB1/TPX2/TTK/KIF14/DLGAP5/CENPF/BUB1B/ANLN/NDC80/CCNB1/CDK1/DTL/PLK4/UBE2C/GTSE1/BLM/PLK1/FBXO5/FAM83D/CENPE/CDC45/PCNA/CDC20/HMMR/MAD2L1/ESPL1/AURKA/AURKB/BRCA1/CDC6/E2F8/TRIP13/CHEK1/DBF4/CDC25C/CDCA5/KNTC1/CDC25A/CLSPN/E2F1/EZH2/E2F7/ATAD5/HAUS8/NEK2/ORC1/TOPBP1/RFWD3/CEP152/GEN1/RBL1/CENPJ/CEP72/WEE1/CHEK2/CDK2/HAUS6/CEP135/CEP78/CDC7/CDK5RAP2/CDT1/PRKDC/MTBP/CDK4/XRCC3/HAUS1/RCC2/CASP2/PRMT…	90
BP	GO:0033260	nuclear DNA replication	35/765	60/18670	2.52679e-33	7.48317e-31	6.2607e-31	BRCA2/RAD51/CDC45/GINS1/PCNA/MCM6/GMNN/MCM3/POLE2/RFC4/MCM2/MCM4/DBF4/MCM5/POLE/POLA2/RFC3/PRIM1/RFC5/ATAD5/FEN1/MCM7/DNA2/POLA1/PRIM2/LIG1/CHEK2/CDC7/CDT1/RFC2/POLD1/POLD2/TIPIN/DONSON/POLD3	35
BP	GO:1901990	regulation of mitotic cell cycle phase transition	84/765	444/18670	7.48705e-33	2.05894e-30	1.72259e-30	BUB1/TPX2/TTK/KIF14/DLGAP5/CENPF/BUB1B/ANLN/NDC80/CCNB1/CDK1/DTL/PLK4/UBE2C/GTSE1/BLM/PLK1/FBXO5/CENPE/CDC45/PCNA/CDC20/HMMR/MAD2L1/ESPL1/AURKA/AURKB/BRCA1/CDC6/E2F8/TRIP13/CDC25C/CDCA5/KNTC1/CDC25A/CLSPN/E2F1/EZH2/E2F7/ATAD5/HAUS8/NEK2/ORC1/TOPBP1/RFWD3/CEP152/GEN1/RBL1/CENPJ/CEP72/WEE1/CHEK2/CDK2/HAUS6/CEP135/CEP78/CDC7/CDK5RAP2/CDT1/PRKDC/MTBP/CDK4/XRCC3/HAUS1/RCC2/CASP2/PRMT1/NDE1/CNOT1/NEDD1…	84
BP	GO:0006310	DNA recombination	68/765	292/18670	1.81863e-32	4.66782e-30	3.90527e-30	EXO1/TOP2A/BRIP1/BLM/BRCA2/RAD51/CDC45/RAD51AP1/POLQ/MCM6/TIMELESS/GINS2/MCM3/BRCA1/XRCC2/TRIP13/MCM2/HMGB2/MCM4/MMS22L/CHEK1/FANCB/RAD54L/MCM5/MCM8/EME1/MND1/ATAD5/FEN1/RAD54B/RFWD3/MCM7/GEN1/HMGB3/MSH6/ACTL6A/FANCM/FIGNL1/MSH2/UNG/CDC7/RBBP8/PRKDC/PSMC3IP/NONO/TEX15/XRCC3/RUVBL1/WRAP53/KPNA2/ZRANB3/GINS4/XRCC5/RECQL4/MSH5/PARP1/HMGB1/KDM1A/RMI1/SMARCAD1/PAXIP1/RAD51C/APEX1/LIG3/ENDOG/RUVBL2/FUS…	68
BP	GO:0000075	cell cycle checkpoint	59/765	216/18670	2.34543e-32	5.64368e-30	4.72171e-30	BUB1/TTK/CENPF/BUB1B/NDC80/CCNB1/CDK1/DTL/TOP2A/GTSE1/BRIP1/BLM/PLK1/CDC45/PCNA/TIMELESS/CDC20/ZWINT/MAD2L1/AURKA/AURKB/BRCA1/CDC6/E2F8/TRIP13/CHEK1/CDC25C/KNTC1/CLSPN/E2F1/EME1/WDR76/E2F7/ZWILCH/ORC1/TOPBP1/RFWD3/DNA2/GEN1/WEE1/CHEK2/CDK2/DCLRE1B/MSH2/CDK5RAP2/CDT1/PRKDC/INTS7/XRCC3/TIPIN/ATRIP/CASP2/PRMT1/CNOT1/DOT1L/CNOT6/DONSON/RPS6/RNASEH2B	59
BP	GO:0044843	cell cycle G1/S phase transition	67/765	298/18670	5.19923e-31	1.17747e-28	9.85117e-29	KIF14/CCNA2/CCNB1/CDK1/MCM10/GTSE1/FBXO5/FAM83D/TYMS/CDC45/PCNA/RRM2/MCM6/GMNN/MCM3/POLE2/AURKA/CDC6/E2F8/CDKN3/IQGAP3/DHFR/MCM2/ORC6/MCM4/DBF4/MCM5/CDC25C/CDC25A/MCM8/E2F1/POLE/POLA2/EZH2/PRIM1/E2F7/ORC1/RFWD3/MCM7/SKP2/POLA1/RBL1/PRIM2/WEE1/CHEK2/CDK2/RCC1/CCNE2/NASP/CDC7/CDT1/RBBP8/PRKDC/MTBP/CDK4/PPAT/CASP2/PRMT1/CNOT1/CNOT6/PHB2/APEX1/ORC2/RPS6/EIF4EBP1/CAMK2A/ATP2B4	67
BP	GO:0006302	double-strand break repair	60/765	248/18670	1.02827e-29	2.18356e-27	1.82685e-27	ESCO2/FOXM1/BRIP1/BLM/BRCA2/RAD51/CDC45/RAD51AP1/POLQ/MCM6/TIMELESS/GINS2/MCM3/BRCA1/XRCC2/TRIP13/MCM2/MCM4/MMS22L/CHEK1/FANCB/RAD54L/MCM5/CDCA5/MCM8/EME1/FEN1/RAD54B/RFWD3/MCM7/DNA2/GEN1/POLA1/CHEK2/DEK/FIGNL1/DCLRE1B/MSH2/CDC7/RBBP8/PRKDC/TDP1/DDX11/TEX15/XRCC3/WRAP53/BARD1/GINS4/XRCC5/RECQL4/MTA1/PARP1/KDM1A/NHEJ1/RMI1/SMARCAD1/PAXIP1/RAD51C/LIG3/FUS	60
BP	GO:0044839	cell cycle G2/M phase transition	62/765	266/18670	1.0776e-29	2.18356e-27	1.82685e-27	TPX2/KIF14/CENPF/CCNB2/MELK/CCNA2/CCNB1/CDK1/DTL/PLK4/GTSE1/FOXM1/BLM/PLK1/FBXO5/HMMR/AURKA/AURKB/BRCA1/CDC6/CHEK1/CDC25C/CDC25A/CLSPN/ATAD5/HAUS8/NEK2/ORC1/TOPBP1/CEP152/SKP2/CENPJ/CEP72/MASTL/WEE1/CHEK2/CDK2/HAUS6/CEP135/CEP78/CDC7/CDK5RAP2/PKMYT1/CIT/CDK4/HAUS1/RCC2/NDE1/NEDD1/NPM1/HAUS3/PPM1D/CEP192/HAUS5/ALMS1/HAUS7/PAXIP1/RAD51C/DONSON/CEP76/RNASEH2B/CKAP5	62
BP	GO:0000082	G1/S transition of mitotic cell cycle	63/765	279/18670	2.54872e-29	4.90628e-27	4.10478e-27	KIF14/CCNB1/CDK1/MCM10/GTSE1/FBXO5/TYMS/CDC45/PCNA/RRM2/MCM6/GMNN/MCM3/POLE2/AURKA/CDC6/E2F8/CDKN3/IQGAP3/DHFR/MCM2/ORC6/MCM4/DBF4/MCM5/CDC25C/CDC25A/MCM8/E2F1/POLE/POLA2/EZH2/PRIM1/E2F7/ORC1/RFWD3/MCM7/SKP2/POLA1/RBL1/PRIM2/WEE1/CHEK2/CDK2/RCC1/CCNE2/NASP/CDC7/CDT1/RBBP8/PRKDC/MTBP/CDK4/PPAT/CASP2/PRMT1/CNOT1/CNOT6/APEX1/ORC2/RPS6/EIF4EBP1/CAMK2A	63
BP	GO:0007093	mitotic cell cycle checkpoint	48/765	165/18670	7.19456e-28	1.319e-25	1.10353e-25	BUB1/TTK/CENPF/BUB1B/NDC80/CCNB1/CDK1/TOP2A/GTSE1/BLM/PLK1/PCNA/CDC20/ZWINT/MAD2L1/AURKA/AURKB/BRCA1/CDC6/E2F8/TRIP13/CDC25C/KNTC1/CLSPN/E2F1/EME1/E2F7/ZWILCH/ORC1/TOPBP1/RFWD3/GEN1/WEE1/CHEK2/CDK2/DCLRE1B/MSH2/CDK5RAP2/CDT1/PRKDC/XRCC3/TIPIN/CASP2/PRMT1/CNOT1/CNOT6/DONSON/RPS6	48
BP	GO:0007098	centrosome cycle	42/765	124/18670	1.67119e-27	2.92458e-25	2.44682e-25	KIF11/CDK1/PLK4/PLK1/BRCA2/AURKA/BRCA1/XRCC2/STIL/CHEK1/HAUS8/NEK2/POC1A/WDR62/CEP152/GEN1/CENPJ/CCNF/CEP72/CDK2/HAUS6/CEP135/CDK5RAP2/SASS6/RTTN/XRCC3/HAUS1/NUP62/RANBP1/NDE1/SYNE2/SLC16A1/XPO1/NPM1/HAUS3/CNTLN/CEP192/HAUS5/ALMS1/HAUS7/CEP76/CKAP5	42
BP	GO:0007051	spindle organization	48/765	170/18670	3.19066e-27	5.34089e-25	4.46839e-25	TPX2/TTK/ASPM/KIF23/KIF11/KIF4A/NDC80/CCNB1/NUF2/RACGAP1/KIFC1/PLK1/FBXO5/MYBL2/CENPE/SPC25/PRC1/CDC20/BIRC5/ESPL1/AURKA/AURKB/SPAG5/STIL/TACC3/HAUS8/NEK2/POC1A/WDR62/CEP72/CHEK2/RCC1/HAUS6/SMC1A/HAUS1/NUP62/PSRC1/SMC3/HAUS3/CEP192/HAUS5/AAAS/HAUS7/RAN/MZT1/HNRNPU/TUBGCP4/CKAP5	48
BP	GO:0000086	G2/M transition of mitotic cell cycle	57/765	247/18670	3.91573e-27	6.28149e-25	5.25533e-25	TPX2/KIF14/CENPF/CCNB2/MELK/CCNA2/CCNB1/CDK1/DTL/PLK4/FOXM1/BLM/PLK1/FBXO5/HMMR/AURKA/AURKB/BRCA1/CDC6/CDC25C/CDC25A/CLSPN/HAUS8/NEK2/ORC1/TOPBP1/CEP152/SKP2/CENPJ/CEP72/MASTL/WEE1/CHEK2/CDK2/HAUS6/CEP135/CEP78/CDC7/CDK5RAP2/PKMYT1/CIT/CDK4/HAUS1/RCC2/NDE1/NEDD1/HAUS3/PPM1D/CEP192/HAUS5/ALMS1/HAUS7/RAD51C/DONSON/CEP76/RNASEH2B/CKAP5	57
BP	GO:0031023	microtubule organizing center organization	42/765	133/18670	4.09404e-26	6.19707e-24	5.1847e-24	KIF11/CDK1/PLK4/PLK1/BRCA2/AURKA/BRCA1/XRCC2/STIL/CHEK1/HAUS8/NEK2/POC1A/WDR62/CEP152/GEN1/CENPJ/CCNF/CEP72/CDK2/HAUS6/CEP135/CDK5RAP2/SASS6/RTTN/XRCC3/HAUS1/NUP62/RANBP1/NDE1/SYNE2/SLC16A1/XPO1/NPM1/HAUS3/CNTLN/CEP192/HAUS5/ALMS1/HAUS7/CEP76/CKAP5	42
BP	GO:0032392	DNA geometric change	40/765	119/18670	4.18504e-26	6.19707e-24	5.1847e-24	TOP2A/BRIP1/BLM/RAD51/CDC45/POLQ/GINS1/ERCC6L/MCM6/GINS2/MCM3/DSCC1/RFC4/MCM2/HMGB2/MCM4/RAD54L/MCM5/MCM8/RFC3/RFC5/RAD54B/MCM7/DNA2/HMGB3/RAD18/RFC2/DDX11/G3BP1/DHX9/RUVBL1/ZRANB3/GINS4/XRCC5/RECQL4/PARP1/HMGB1/SMARCAD1/ERCC8/RUVBL2	40
BP	GO:0090068	positive regulation of cell cycle process	61/765	298/18670	5.86397e-26	8.36158e-24	6.99561e-24	KIF14/DLGAP5/KIF23/NDC80/NUSAP1/CCNB1/CDK1/DTL/ECT2/PLK4/RACGAP1/UBE2C/GTSE1/FBXO5/FAM83D/CDC45/PCNA/MAD2L1/ESPL1/AURKA/AURKB/BRCA1/SPAG5/CDC6/E2F8/DBF4/CDC25C/CDCA5/CDC25A/KIF20B/E2F1/EZH2/E2F7/ATAD5/FEN1/POC1A/GEN1/CENPJ/CHEK2/CDK2/CDC7/CENPV/CDT1/DDX11/MTBP/CIT/CDK4/XRCC3/NUP62/RANBP1/RCC2/CASP2/PRMT1/CNOT1/NPM1/CNOT6/PHB2/RAD51C/APEX1/HNRNPU/PPP2R5B	61
BP	GO:0045787	positive regulation of cell cycle	69/765	389/18670	2.34203e-25	3.15694e-23	2.64121e-23	KIF14/DLGAP5/KIF23/NDC80/NUSAP1/CCNB1/CDK1/DTL/ECT2/PLK4/RACGAP1/UBE2C/GTSE1/BRCA2/FBXO5/FAM83D/CDC45/PCNA/MAD2L1/ESPL1/AURKA/AURKB/BRCA1/SPAG5/CDC6/E2F8/CHEK1/DBF4/CDC25C/CDCA5/CDC25A/KIF20B/E2F1/EZH2/E2F7/ATAD5/FEN1/POC1A/GEN1/CKS1B/CENPJ/CKS2/CHEK2/CDK2/CDC7/CENPV/CDT1/DDX11/MTBP/CIT/CDK4/XRCC3/NUP62/PSRC1/ZNF268/RANBP1/RCC2/CASP2/PRMT1/CNOT1/RPS15A/NPM1/CNOT6/PHB2/RAD51C/APEX1/HNRNPU/EIF4EBP1…	69
BP	GO:1902850	microtubule cytoskeleton organization involved in mitosis	41/765	131/18670	2.37795e-25	3.15694e-23	2.64121e-23	TPX2/TTK/KIF23/KIF11/KIF4A/NDC80/NUSAP1/CCNB1/NUF2/RACGAP1/KIFC1/PLK1/MYBL2/CENPE/SPC25/PRC1/CDC20/BIRC5/MAD2L1/ESPL1/AURKA/AURKB/STIL/TACC3/CENPA/NEK2/POC1A/WDR62/CHEK2/RCC1/CDK5RAP2/SMC1A/NUP62/PSRC1/SMC3/NDE1/CEP192/AAAS/RAN/MZT1/HNRNPU	41
BP	GO:1902749	regulation of cell cycle G2/M phase transition	51/765	213/18670	3.51193e-25	4.50698e-23	3.77071e-23	TPX2/KIF14/CENPF/CCNB1/CDK1/DTL/PLK4/GTSE1/BLM/PLK1/FBXO5/HMMR/AURKA/AURKB/BRCA1/CDC6/CHEK1/CDC25C/CDC25A/CLSPN/ATAD5/HAUS8/NEK2/ORC1/TOPBP1/CEP152/CENPJ/CEP72/CDK2/HAUS6/CEP135/CEP78/CDC7/CDK5RAP2/CDK4/HAUS1/RCC2/NDE1/NEDD1/NPM1/HAUS3/CEP192/HAUS5/ALMS1/HAUS7/PAXIP1/RAD51C/DONSON/CEP76/RNASEH2B/CKAP5	51
BP	GO:0010948	negative regulation of cell cycle process	66/765	361/18670	4.63236e-25	5.75309e-23	4.81325e-23	BUB1/TTK/CENPF/BUB1B/NDC80/CCNB1/CDK1/DTL/GTSE1/PTTG1/BLM/PLK1/FBXO5/RAD51/PCNA/RRM2/CDC20/MAD2L1/ESPL1/AURKA/AURKB/BRCA1/CDC6/E2F8/TRIP13/CHEK1/CDC25C/CLSPN/E2F1/EZH2/E2F7/FBXO43/NEK2/ORC1/TOPBP1/RFWD3/GEN1/RBL1/CCNF/WEE1/CHEK2/MSH6/CDK2/CDC7/CDK5RAP2/CDT1/SMC1A/RBBP8/PRKDC/MTBP/CDK4/XRCC3/CBX5/CBX3/ZNF268/SMC3/CASP2/PRMT1/CNOT1/EHMT2/SUZ12/NPM1/CNOT6/DONSON/APAF1/PPP2R5B	66
BP	GO:0006271	DNA strand elongation involved in DNA replication	17/765	17/18670	2.17864e-24	2.62118e-22	2.19298e-22	GINS1/PCNA/GINS2/MCM3/RFC4/MCM4/POLE/RFC3/MCM7/DNA2/POLA1/LIG1/POLD2/GINS4/LIG3/POLD3/GINS3	17
BP	GO:0051983	regulation of chromosome segregation	36/765	103/18670	2.72384e-24	3.17781e-22	2.65868e-22	BUB1/TTK/DLGAP5/CENPF/BUB1B/NDC80/MKI67/CCNB1/ECT2/RACGAP1/KIF2C/PTTG1/PLK1/FBXO5/CENPE/CDC20/MAD2L1/ESPL1/AURKB/SPAG5/CDC6/TRIP13/TACC3/CDCA5/NEK2/FEN1/GEN1/RAD18/CDK5RAP2/CDT1/CTCF/DDX11/XRCC3/RCC2/ANAPC1/HNRNPU	36
BP	GO:0007088	regulation of mitotic nuclear division	44/765	164/18670	4.75777e-24	5.38748e-22	4.50737e-22	BUB1/TTK/DLGAP5/CENPF/KIF11/BUB1B/ANLN/NDC80/NUSAP1/MKI67/CCNB1/UBE2C/PTTG1/PLK1/FBXO5/CENPE/CDC20/MAD2L1/ESPL1/AURKA/AURKB/CDC6/TRIP13/CHEK1/TACC3/CDC25C/CDCA5/KNTC1/KIF20B/NEK2/GEN1/RCC1/CDK5RAP2/PKMYT1/CDT1/SMC1A/MTBP/XRCC3/NUP62/RANBP1/SMC3/PHB2/ANAPC1/HNRNPU	44
BP	GO:0051321	meiotic cell cycle	53/765	249/18670	1.58677e-23	1.74545e-21	1.4603e-21	BUB1/NCAPH/TTK/ASPM/BUB1B/EXO1/KIF18A/NUF2/TOP2A/PTTG1/BRIP1/PLK1/BRCA2/FBXO5/RAD51/CDC20/NCAPD2/ESPL1/SMC4/AURKA/XRCC2/TRIP13/FANCD2/FANCA/RAD54L/CDC25C/CDC25A/EME1/MND1/FBXO43/NEK2/SMC2/RAD54B/CKS2/MYBL1/MASTL/MSH6/CDK2/FANCM/FIGNL1/NCAPD3/CCNE2/PKMYT1/SMC1A/RBBP8/PSMC3IP/TEX15/TOP3A/SMC3/MSH5/RMI1/RAD51C/TUBGCP4	53
BP	GO:0032508	DNA duplex unwinding	36/765	110/18670	3.66927e-23	3.92408e-21	3.28303e-21	TOP2A/BRIP1/BLM/RAD51/CDC45/POLQ/GINS1/ERCC6L/MCM6/GINS2/MCM3/DSCC1/RFC4/MCM2/MCM4/MCM5/MCM8/RFC3/RFC5/RAD54B/MCM7/DNA2/RAD18/RFC2/DDX11/G3BP1/DHX9/RUVBL1/ZRANB3/GINS4/XRCC5/RECQL4/PARP1/SMARCAD1/ERCC8/RUVBL2	36
BP	GO:0000724	double-strand break repair via homologous recombination	39/765	134/18670	7.13263e-23	7.42179e-21	6.20935e-21	BLM/BRCA2/RAD51/CDC45/RAD51AP1/POLQ/MCM6/TIMELESS/GINS2/MCM3/BRCA1/XRCC2/MCM2/MCM4/MMS22L/CHEK1/FANCB/RAD54L/MCM5/MCM8/FEN1/RAD54B/RFWD3/MCM7/GEN1/FIGNL1/CDC7/RBBP8/TEX15/XRCC3/WRAP53/GINS4/RECQL4/PARP1/KDM1A/RMI1/RAD51C/LIG3/FUS	39
BP	GO:0000725	recombinational repair	39/765	135/18670	9.64827e-23	9.77523e-21	8.17832e-21	BLM/BRCA2/RAD51/CDC45/RAD51AP1/POLQ/MCM6/TIMELESS/GINS2/MCM3/BRCA1/XRCC2/MCM2/MCM4/MMS22L/CHEK1/FANCB/RAD54L/MCM5/MCM8/FEN1/RAD54B/RFWD3/MCM7/GEN1/FIGNL1/CDC7/RBBP8/TEX15/XRCC3/WRAP53/GINS4/RECQL4/PARP1/KDM1A/RMI1/RAD51C/LIG3/FUS	39
BP	GO:0007052	mitotic spindle organization	35/765	106/18670	1.06219e-22	1.04857e-20	8.77272e-21	TPX2/TTK/KIF23/KIF11/KIF4A/NDC80/CCNB1/NUF2/RACGAP1/KIFC1/PLK1/MYBL2/CENPE/SPC25/PRC1/CDC20/BIRC5/AURKA/AURKB/STIL/TACC3/NEK2/POC1A/WDR62/CHEK2/RCC1/SMC1A/NUP62/PSRC1/SMC3/CEP192/AAAS/RAN/MZT1/HNRNPU	35
BP	GO:0010389	regulation of G2/M transition of mitotic cell cycle	46/765	196/18670	1.96436e-22	1.8907e-20	1.58183e-20	TPX2/KIF14/CENPF/CCNB1/CDK1/DTL/PLK4/BLM/PLK1/FBXO5/HMMR/AURKA/AURKB/BRCA1/CDC6/CDC25C/CDC25A/CLSPN/HAUS8/NEK2/ORC1/TOPBP1/CEP152/CENPJ/CEP72/CDK2/HAUS6/CEP135/CEP78/CDC7/CDK5RAP2/CDK4/HAUS1/RCC2/NDE1/NEDD1/HAUS3/CEP192/HAUS5/ALMS1/HAUS7/RAD51C/DONSON/CEP76/RNASEH2B/CKAP5	46
BP	GO:0051783	regulation of nuclear division	45/765	188/18670	2.3999e-22	2.25356e-20	1.88541e-20	BUB1/TTK/DLGAP5/CENPF/KIF11/BUB1B/ANLN/NDC80/NUSAP1/MKI67/CCNB1/UBE2C/PTTG1/PLK1/FBXO5/CENPE/CDC20/MAD2L1/ESPL1/AURKA/AURKB/CDC6/TRIP13/CHEK1/TACC3/CDC25C/CDCA5/KNTC1/KIF20B/FBXO43/NEK2/GEN1/RCC1/CDK5RAP2/PKMYT1/CDT1/SMC1A/MTBP/XRCC3/NUP62/RANBP1/SMC3/PHB2/ANAPC1/HNRNPU	45
BP	GO:0031570	DNA integrity checkpoint	41/765	157/18670	5.25853e-22	4.77896e-20	3.99825e-20	CCNB1/CDK1/DTL/TOP2A/GTSE1/BRIP1/BLM/PLK1/CDC45/PCNA/TIMELESS/AURKA/BRCA1/CDC6/E2F8/CHEK1/CDC25C/CLSPN/E2F1/EME1/WDR76/E2F7/ORC1/TOPBP1/RFWD3/DNA2/CHEK2/CDK2/MSH2/CDT1/PRKDC/INTS7/TIPIN/ATRIP/CASP2/PRMT1/CNOT1/DOT1L/CNOT6/DONSON/RNASEH2B	41
BP	GO:0051304	chromosome separation	32/765	90/18670	5.33754e-22	4.77896e-20	3.99825e-20	BUB1/NCAPH/TTK/DLGAP5/CENPF/BUB1B/NDC80/CCNB1/TOP2A/PTTG1/PLK1/FBXO5/CENPE/CDC20/NCAPD2/MAD2L1/ESPL1/AURKB/CDC6/TRIP13/TACC3/EME1/GEN1/FANCM/NCAPD3/CDK5RAP2/CDT1/XRCC3/TOP3A/RMI1/SMARCAD1/ANAPC1	32
BP	GO:0022616	DNA strand elongation	18/765	24/18670	9.32386e-21	8.15838e-19	6.8256e-19	GINS1/PCNA/GINS2/MCM3/RFC4/MCM4/POLE/RFC3/MCM7/DNA2/POLA1/LIG1/DCLRE1B/POLD2/GINS4/LIG3/POLD3/GINS3	18
BP	GO:1903046	meiotic cell cycle process	43/765	188/18670	1.39167e-20	1.19066e-18	9.96146e-19	BUB1/NCAPH/TTK/ASPM/BUB1B/KIF18A/NUF2/TOP2A/PTTG1/BRIP1/PLK1/BRCA2/FBXO5/RAD51/CDC20/NCAPD2/ESPL1/SMC4/AURKA/TRIP13/FANCD2/FANCA/RAD54L/CDC25C/CDC25A/EME1/MND1/FBXO43/SMC2/RAD54B/CKS2/MYBL1/MASTL/MSH6/FANCM/FIGNL1/NCAPD3/CCNE2/PSMC3IP/TEX15/MSH5/RMI1/RAD51C	43
BP	GO:0000723	telomere maintenance	40/765	162/18670	1.57621e-20	1.31922e-18	1.10371e-18	EXO1/BLM/BRCA2/RAD51/PCNA/POLE2/AURKB/RFC4/POLE/POLA2/RFC3/PRIM1/RFC5/NEK2/FEN1/DNA2/POLA1/PRIM2/DCLRE1B/CCNE2/PRKDC/RFC2/POLD1/XRCC3/POLD2/HNRNPA1/WRAP53/DKC1/HNRNPD/XRCC5/RECQL4/PARP1/CCT7/CCT2/CCT5/RAD51C/APEX1/POLD3/CCT3/HNRNPU	40
BP	GO:0006275	regulation of DNA replication	33/765	108/18670	2.77546e-20	2.27351e-18	1.90211e-18	ESCO2/CCNA2/CDK1/BLM/BRCA2/FBXO5/PCNA/TIMELESS/GMNN/DSCC1/CDC6/E2F8/RFC4/DBF4/RFC3/E2F7/RFC5/ATAD5/DNA2/CHEK2/MSH6/CDK2/CDC7/CDT1/SMC1A/RFC2/DHX9/ZRANB3/TIPIN/SMC3/EHMT2/DONSON/LIG3	33
BP	GO:0006270	DNA replication initiation	21/765	37/18670	3.86813e-20	3.10256e-18	2.59572e-18	MCM10/CDC45/MCM6/MCM3/POLE2/CDC6/MCM2/ORC6/MCM4/MCM5/POLE/POLA2/PRIM1/ORC1/MCM7/POLA1/PRIM2/CDK2/CCNE2/CDT1/ORC2	21
BP	GO:0032200	telomere organization	41/765	175/18670	4.26807e-20	3.35349e-18	2.80565e-18	EXO1/BLM/BRCA2/RAD51/PCNA/POLE2/AURKB/RFC4/POLE/POLA2/RFC3/PRIM1/RFC5/NEK2/FEN1/DNA2/POLA1/PRIM2/DCLRE1B/CCNE2/PRKDC/RFC2/POLD1/XRCC3/POLD2/HNRNPA1/WRAP53/DKC1/HNRNPD/XRCC5/RECQL4/DOT1L/PARP1/CCT7/CCT2/CCT5/RAD51C/APEX1/POLD3/CCT3/HNRNPU	41
BP	GO:0033044	regulation of chromosome organization	57/765	342/18670	9.15878e-20	7.05226e-18	5.90018e-18	BUB1/TTK/DLGAP5/CENPF/BUB1B/NDC80/MKI67/CCNB1/TOP2A/PTTG1/ATAD2/PLK1/FBXO5/CENPE/CDC45/CDC20/MAD2L1/ESPL1/AURKB/BRCA1/CDC6/TRIP13/MCM2/CHEK1/TACC3/CDCA5/NEK2/MYB/FEN1/GEN1/DNMT1/CDK5RAP2/CENPV/CDT1/TRIM28/CTCF/DDX11/XRCC3/HNRNPA1/SET/PHF19/DKC1/HNRNPD/XRCC5/TET1/PARP1/KDM1A/BCOR/CCT7/CCT2/CCT5/PAXIP1/RUVBL2/ANAPC1/CCT3/HNRNPU/NAP1L2	57
BP	GO:0090329	regulation of DNA-dependent DNA replication	24/765	54/18670	1.54449e-19	1.16593e-17	9.75464e-18	BLM/BRCA2/FBXO5/TIMELESS/GMNN/DSCC1/E2F8/RFC4/DBF4/RFC3/E2F7/RFC5/CHEK2/MSH6/CDK2/CDC7/CDT1/SMC1A/RFC2/ZRANB3/TIPIN/SMC3/DONSON/LIG3	24
BP	GO:0006403	RNA localization	46/765	230/18670	2.06158e-19	1.52636e-17	1.27701e-17	IGF2BP3/NUP107/NUP188/EXOSC2/NUP205/NUP155/HNRNPA1/NUP37/HNRNPA3/DHX9/SRSF2/NUP35/RUVBL1/WRAP53/NUP62/U2AF2/SRSF1/DKC1/NUP88/MAGOHB/POLR2D/XPO1/XPO5/CPSF3/NUP50/SRSF3/NUP160/NUP210/NPM1/CCT7/NUP93/CCT2/CPSF6/FBL/CCT5/AAAS/RAN/RUVBL2/SRSF6/RBM15B/THOC3/SRSF9/CCT3/HNRNPU/SRSF7/CKAP5	46
BP	GO:0033045	regulation of sister chromatid segregation	28/765	80/18670	3.3654e-19	2.44468e-17	2.04531e-17	BUB1/TTK/DLGAP5/CENPF/BUB1B/NDC80/CCNB1/PTTG1/PLK1/FBXO5/CENPE/CDC20/MAD2L1/ESPL1/AURKB/CDC6/TRIP13/TACC3/CDCA5/FEN1/GEN1/CDK5RAP2/CDT1/CTCF/DDX11/XRCC3/ANAPC1/HNRNPU	28
BP	GO:0072331	signal transduction by p53 class mediator	49/765	267/18670	6.05789e-19	4.31905e-17	3.61348e-17	TPX2/EXO1/CCNB1/CDK1/GTSE1/FOXM1/BRIP1/BLM/BRCA2/PCNA/AURKA/AURKB/BRCA1/E2F8/RFC4/CHEK1/CDC25C/E2F1/RFC3/E2F7/RFC5/ATAD5/E2F2/TOPBP1/DNA2/CHEK2/CDK2/TAF5/MSH2/RBBP8/RFC2/HDAC2/SSRP1/BARD1/TOP3A/ATRIP/CASP2/PRMT1/CNOT1/RPS7/EHMT2/TRIM24/KDM1A/CNOT6/RMI1/PPM1D/PAXIP1/NOP2/PLA2R1	49
BP	GO:0006323	DNA packaging	47/765	247/18670	6.99029e-19	4.8932e-17	4.09383e-17	NCAPH/HJURP/NCAPG/NUSAP1/CCNB1/CDK1/CENPK/TOP2A/CENPI/NCAPD2/OIP5/SMC4/MCM2/HMGB2/CENPA/CENPO/CDCA5/CENPH/HELLS/NCAPG2/ASF1B/CHAF1A/SMC2/CENPM/CENPL/DNMT1/CHAF1B/SRPK1/NCAPD3/NASP/CENPV/TRIM28/CENPN/CTCF/ITGB3BP/CENPQ/CENPP/ANP32B/SET/RUVBL1/BEND3/TET1/SUV39H1/NPM1/NAP1L1/DNMT3A/NAP1L2	47
BP	GO:0045930	negative regulation of mitotic cell cycle	55/765	338/18670	1.28115e-18	8.80791e-17	7.36903e-17	BUB1/TTK/CENPF/BUB1B/NDC80/CCNB1/CDK1/TOP2A/GTSE1/PTTG1/BLM/PLK1/FBXO5/PCNA/CDC20/ZWINT/MAD2L1/AURKA/AURKB/BRCA1/CDC6/E2F8/TRIP13/CHEK1/CDC25C/KNTC1/CLSPN/E2F1/EME1/EZH2/E2F7/ZWILCH/ORC1/TOPBP1/RFWD3/GEN1/RBL1/WEE1/CHEK2/CDK2/DCLRE1B/MSH2/CDK5RAP2/CDT1/PRKDC/MTBP/CDK4/XRCC3/TIPIN/CASP2/PRMT1/CNOT1/CNOT6/DONSON/RPS6	55
BP	GO:0051225	spindle assembly	31/765	108/18670	2.98681e-18	2.01741e-16	1.68784e-16	TPX2/ASPM/KIF23/KIF11/KIF4A/RACGAP1/KIFC1/PLK1/FBXO5/MYBL2/CDC20/BIRC5/AURKA/AURKB/SPAG5/HAUS8/NEK2/CHEK2/RCC1/HAUS6/SMC1A/HAUS1/SMC3/HAUS3/CEP192/HAUS5/AAAS/HAUS7/MZT1/HNRNPU/TUBGCP4	31
BP	GO:0051298	centrosome duplication	25/765	67/18670	4.58977e-18	3.04666e-16	2.54895e-16	PLK4/BRCA2/BRCA1/STIL/POC1A/WDR62/CEP152/GEN1/CENPJ/CCNF/CEP72/CDK2/CEP135/CDK5RAP2/SASS6/RTTN/XRCC3/NUP62/NDE1/XPO1/NPM1/CEP192/ALMS1/CEP76/CKAP5	25
BP	GO:0051052	regulation of DNA metabolic process	55/765	351/18670	7.41779e-18	4.84042e-16	4.04967e-16	FOXM1/BLM/RAD51/RAD51AP1/POLQ/PCNA/TIMELESS/DSCC1/AURKB/BRCA1/RFC4/CHEK1/FANCB/RFC3/ZNF93/RFC5/ATAD5/NEK2/DEK/MSH6/CDK2/FIGNL1/MSH2/CDT1/TRIM28/POLH/PRKDC/RFC2/DDX11/TEX15/USP1/HNRNPA1/DHX9/WRAP53/KPNA2/ZRANB3/DKC1/HNRNPD/XRCC5/PARP1/HMGB1/NPM1/KDM1A/NVL/CCT7/CCT2/CCT5/SMARCAD1/PAXIP1/APAF1/ERCC8/ENDOG/FUS/CCT3/HNRNPU	55
BP	GO:0140013	meiotic nuclear division	38/765	172/18670	8.67432e-18	5.56602e-16	4.65674e-16	BUB1/NCAPH/TTK/ASPM/BUB1B/KIF18A/NUF2/TOP2A/PTTG1/BRIP1/PLK1/BRCA2/FBXO5/RAD51/CDC20/ESPL1/SMC4/AURKA/TRIP13/FANCD2/FANCA/RAD54L/EME1/MND1/FBXO43/SMC2/RAD54B/CKS2/MYBL1/MASTL/FANCM/FIGNL1/CCNE2/PSMC3IP/TEX15/MSH5/RMI1/RAD51C	38
BP	GO:0010965	regulation of mitotic sister chromatid separation	23/765	57/18670	1.25863e-17	7.94378e-16	6.64606e-16	BUB1/TTK/DLGAP5/CENPF/BUB1B/NDC80/CCNB1/PTTG1/PLK1/FBXO5/CENPE/CDC20/MAD2L1/ESPL1/AURKB/CDC6/TRIP13/TACC3/GEN1/CDK5RAP2/CDT1/XRCC3/ANAPC1	23
BP	GO:0051306	mitotic sister chromatid separation	23/765	60/18670	4.9333e-17	3.06342e-15	2.56297e-15	BUB1/TTK/DLGAP5/CENPF/BUB1B/NDC80/CCNB1/PTTG1/PLK1/FBXO5/CENPE/CDC20/MAD2L1/ESPL1/AURKB/CDC6/TRIP13/TACC3/GEN1/CDK5RAP2/CDT1/XRCC3/ANAPC1	23
BP	GO:0007091	metaphase/anaphase transition of mitotic cell cycle	22/765	54/18670	5.02305e-17	3.06964e-15	2.56817e-15	BUB1/TTK/DLGAP5/CENPF/BUB1B/NDC80/CCNB1/PLK1/FBXO5/CENPE/CDC20/MAD2L1/ESPL1/AURKB/CDC6/TRIP13/TACC3/GEN1/CDK5RAP2/CDT1/XRCC3/ANAPC1	22
BP	GO:0071824	protein-DNA complex subunit organization	48/765	288/18670	7.99796e-17	4.81127e-15	4.02529e-15	CENPF/HJURP/CENPK/CENPE/RAD51/CENPI/CDC45/MCM6/GMNN/MCM3/OIP5/MCM2/HMGB2/MCM4/CENPA/CENPO/MCM5/CENPH/HELLS/ASF1B/CHAF1A/CENPM/CENPL/MCM7/CHAF1B/NASP/CENPV/CDT1/CENPN/CTCF/ITGB3BP/CENPQ/CENPP/ANP32B/ANP32E/SET/RUVBL1/PTMA/SMARCC1/ARID2/PARP1/HMGB1/NPM1/SMARCD1/SMARCA4/POLR1E/NAP1L1/NAP1L2	48
BP	GO:0033047	regulation of mitotic sister chromatid segregation	24/765	68/18670	9.60772e-17	5.69073e-15	4.76107e-15	BUB1/TTK/DLGAP5/CENPF/BUB1B/NDC80/CCNB1/PTTG1/PLK1/FBXO5/CENPE/CDC20/MAD2L1/ESPL1/AURKB/CDC6/TRIP13/TACC3/GEN1/CDK5RAP2/CDT1/XRCC3/ANAPC1/HNRNPU	24
BP	GO:1905818	regulation of chromosome separation	23/765	62/18670	1.16485e-16	6.79494e-15	5.68489e-15	BUB1/TTK/DLGAP5/CENPF/BUB1B/NDC80/CCNB1/PTTG1/PLK1/FBXO5/CENPE/CDC20/MAD2L1/ESPL1/AURKB/CDC6/TRIP13/TACC3/GEN1/CDK5RAP2/CDT1/XRCC3/ANAPC1	23
BP	GO:0044784	metaphase/anaphase transition of cell cycle	22/765	56/18670	1.27587e-16	7.33148e-15	6.13379e-15	BUB1/TTK/DLGAP5/CENPF/BUB1B/NDC80/CCNB1/PLK1/FBXO5/CENPE/CDC20/MAD2L1/ESPL1/AURKB/CDC6/TRIP13/TACC3/GEN1/CDK5RAP2/CDT1/XRCC3/ANAPC1	22
BP	GO:0006338	chromatin remodeling	41/765	220/18670	2.696e-16	1.52641e-14	1.27705e-14	HJURP/CENPK/CENPI/OIP5/HMGB2/CENPA/CENPO/CENPH/HELLS/SUV39H2/MYB/CENPM/CENPL/DNMT1/HMGB3/ACTL6A/NASP/CENPV/TRIM28/CENPN/ITGB3BP/CENPQ/CENPP/HDAC2/ANP32E/RUVBL1/PTMA/CBX3/SMARCC1/BAZ1A/BEND3/TET1/SUV39H1/HMGB1/NPM1/SMARCD1/SMARCA4/SMARCAD1/RUVBL2/NUDT5/DNMT3A	41
BP	GO:0006405	RNA export from nucleus	32/765	135/18670	3.98126e-16	2.22143e-14	1.85853e-14	NUP107/NUP188/NUP205/NUP155/HNRNPA1/NUP37/DHX9/SRSF2/NUP35/NUP62/U2AF2/SRSF1/NUP88/MAGOHB/POLR2D/XPO1/XPO5/CPSF3/NUP50/SRSF3/NUP160/NUP210/NPM1/NUP93/CPSF6/AAAS/RAN/SRSF6/RBM15B/THOC3/SRSF9/SRSF7	32
BP	GO:0032201	telomere maintenance via semi-conservative replication	16/765	27/18670	4.63162e-16	2.54739e-14	2.13124e-14	PCNA/POLE2/RFC4/POLE/POLA2/RFC3/PRIM1/RFC5/FEN1/DNA2/POLA1/PRIM2/RFC2/POLD1/POLD2/POLD3	16
BP	GO:1901988	negative regulation of cell cycle phase transition	45/765	267/18670	4.90071e-16	2.65743e-14	2.2233e-14	BUB1/TTK/CENPF/BUB1B/NDC80/CCNB1/CDK1/DTL/GTSE1/BLM/PLK1/FBXO5/PCNA/CDC20/MAD2L1/AURKA/AURKB/BRCA1/CDC6/E2F8/TRIP13/CHEK1/CDC25C/CLSPN/E2F1/EZH2/E2F7/ORC1/TOPBP1/RFWD3/GEN1/RBL1/WEE1/CHEK2/CDK2/CDK5RAP2/CDT1/PRKDC/CDK4/XRCC3/CASP2/PRMT1/CNOT1/CNOT6/DONSON	45
BP	GO:0000077	DNA damage checkpoint	33/765	145/18670	5.02009e-16	2.68436e-14	2.24583e-14	CCNB1/CDK1/DTL/GTSE1/BRIP1/BLM/PLK1/PCNA/AURKA/BRCA1/E2F8/CHEK1/CDC25C/CLSPN/E2F1/EME1/WDR76/E2F7/RFWD3/CHEK2/CDK2/MSH2/PRKDC/INTS7/TIPIN/ATRIP/CASP2/PRMT1/CNOT1/DOT1L/CNOT6/DONSON/RNASEH2B	33
BP	GO:1901991	negative regulation of mitotic cell cycle phase transition	43/765	248/18670	7.73293e-16	4.07833e-14	3.41208e-14	BUB1/TTK/CENPF/BUB1B/NDC80/CCNB1/CDK1/GTSE1/BLM/PLK1/FBXO5/PCNA/CDC20/MAD2L1/AURKA/AURKB/BRCA1/CDC6/E2F8/TRIP13/CDC25C/CLSPN/E2F1/EZH2/E2F7/ORC1/TOPBP1/RFWD3/GEN1/RBL1/WEE1/CHEK2/CDK2/CDK5RAP2/CDT1/PRKDC/CDK4/XRCC3/CASP2/PRMT1/CNOT1/CNOT6/DONSON	43
BP	GO:0034502	protein localization to chromosome	25/765	83/18670	1.59309e-15	8.28838e-14	6.93437e-14	TTK/ESCO2/NDC80/CDK1/PLK1/BRCA2/AURKB/CENPA/CDCA5/MCM8/EZH2/MSH2/CDT1/CTCF/MTBP/CENPQ/WRAP53/RCC2/DKC1/XRCC5/CCT7/CCT2/CCT5/RUVBL2/CCT3	25
BP	GO:0030071	regulation of mitotic metaphase/anaphase transition	20/765	51/18670	3.26298e-15	1.67499e-13	1.40136e-13	BUB1/TTK/DLGAP5/CENPF/BUB1B/NDC80/CCNB1/PLK1/FBXO5/CENPE/CDC20/MAD2L1/ESPL1/AURKB/CDC6/TRIP13/GEN1/CDK5RAP2/CDT1/XRCC3	20
BP	GO:0051168	nuclear export	37/765	194/18670	3.63834e-15	1.84311e-13	1.54201e-13	GTSE1/NUP107/CSE1L/NUP188/NUP205/NUP155/ANP32B/HNRNPA1/NUP37/DHX9/SRSF2/NUP35/NUP62/BARD1/U2AF2/SRSF1/NUP88/MAGOHB/POLR2D/XPO1/XPO5/CPSF3/NUP50/SRSF3/NUP160/NUP210/NPM1/NUP93/CPSF6/AAAS/CTDSPL2/RAN/SRSF6/RBM15B/THOC3/SRSF9/SRSF7	37
BP	GO:0065004	protein-DNA complex assembly	42/765	248/18670	3.97887e-15	1.98943e-13	1.66443e-13	CENPF/HJURP/CENPK/CENPE/RAD51/CENPI/CDC45/MCM6/GMNN/MCM3/OIP5/MCM2/HMGB2/MCM4/CENPA/CENPO/MCM5/CENPH/HELLS/ASF1B/CHAF1A/CENPM/CENPL/MCM7/CHAF1B/NASP/CENPV/CDT1/CENPN/ITGB3BP/CENPQ/CENPP/ANP32B/SET/RUVBL1/PARP1/HMGB1/NPM1/SMARCA4/POLR1E/NAP1L1/NAP1L2	42
BP	GO:1902099	regulation of metaphase/anaphase transition of cell cycle	20/765	53/18670	7.8811e-15	3.89003e-13	3.25454e-13	BUB1/TTK/DLGAP5/CENPF/BUB1B/NDC80/CCNB1/PLK1/FBXO5/CENPE/CDC20/MAD2L1/ESPL1/AURKB/CDC6/TRIP13/GEN1/CDK5RAP2/CDT1/XRCC3	20
BP	GO:0044774	mitotic DNA integrity checkpoint	27/765	106/18670	1.20237e-14	5.85963e-13	4.90238e-13	CCNB1/CDK1/TOP2A/GTSE1/BLM/PCNA/AURKA/CDC6/E2F8/CDC25C/CLSPN/E2F1/EME1/E2F7/ORC1/TOPBP1/RFWD3/CHEK2/CDK2/MSH2/PRKDC/TIPIN/CASP2/PRMT1/CNOT1/CNOT6/DONSON	27
BP	GO:0051054	positive regulation of DNA metabolic process	36/765	191/18670	1.26372e-14	6.08164e-13	5.08813e-13	FOXM1/RAD51/PCNA/TIMELESS/DSCC1/AURKB/BRCA1/RFC4/FANCB/RFC3/RFC5/ATAD5/NEK2/CDK2/MSH2/TRIM28/PRKDC/RFC2/DDX11/HNRNPA1/DHX9/WRAP53/DKC1/HNRNPD/XRCC5/PARP1/HMGB1/NVL/CCT7/CCT2/CCT5/PAXIP1/ERCC8/ENDOG/FUS/CCT3	36
BP	GO:0050657	nucleic acid transport	36/765	193/18670	1.76881e-14	8.30479e-13	6.94809e-13	IGF2BP3/NUP107/NUP188/NUP205/NUP155/HNRNPA1/NUP37/HNRNPA3/DHX9/SRSF2/NUP35/NUP62/U2AF2/SRSF1/NUP88/MAGOHB/POLR2D/XPO1/XPO5/CPSF3/NUP50/SRSF3/NUP160/NUP210/NPM1/NUP93/CPSF6/AAAS/RAN/SRSF6/RBM15B/THOC3/SRSF9/HNRNPU/SRSF7/CKAP5	36
BP	GO:0050658	RNA transport	36/765	193/18670	1.76881e-14	8.30479e-13	6.94809e-13	IGF2BP3/NUP107/NUP188/NUP205/NUP155/HNRNPA1/NUP37/HNRNPA3/DHX9/SRSF2/NUP35/NUP62/U2AF2/SRSF1/NUP88/MAGOHB/POLR2D/XPO1/XPO5/CPSF3/NUP50/SRSF3/NUP160/NUP210/NPM1/NUP93/CPSF6/AAAS/RAN/SRSF6/RBM15B/THOC3/SRSF9/HNRNPU/SRSF7/CKAP5	36
BP	GO:0006913	nucleocytoplasmic transport	49/765	343/18670	2.04083e-14	9.46649e-13	7.92001e-13	ECT2/GTSE1/NUP107/CSE1L/NUP188/TRIM28/NUP205/SNRPB/IPO5/NUP155/PPP1CC/ANP32B/HNRNPA1/NUP37/DHX9/SRSF2/NUP35/NUP62/KPNA2/BARD1/U2AF2/SRSF1/SNRPF/NUP88/MAGOHB/POLR2D/SNRPD1/XPO1/XPO5/CPSF3/ANP32A/NUP50/SRSF3/NUP160/NUP210/NPM1/NUP93/PHB2/CPSF6/GEMIN4/AAAS/CTDSPL2/RAN/SNRPE/SRSF6/RBM15B/THOC3/SRSF9/SRSF7	49
BP	GO:0034508	centromere complex assembly	20/765	56/18670	2.72411e-14	1.24855e-12	1.04458e-12	CENPF/HJURP/CENPK/CENPE/CENPI/OIP5/CENPA/CENPO/CENPH/HELLS/CENPM/CENPL/NASP/CENPV/CENPN/ITGB3BP/CENPQ/CENPP/RUVBL1/NPM1	20
BP	GO:0006333	chromatin assembly or disassembly	39/765	228/18670	2.76895e-14	1.25417e-12	1.04929e-12	HJURP/CENPK/CENPI/OIP5/MCM2/HMGB2/CENPA/CENPO/CENPH/HELLS/SUV39H2/ASF1B/CHAF1A/CENPM/CENPL/DNMT1/CHAF1B/NASP/CENPV/TRIM28/CENPN/CTCF/ITGB3BP/CENPQ/CENPP/ANP32B/SET/RUVBL1/SMARCC1/BEND3/TET1/SUV39H1/ARID2/NPM1/SMARCD1/SMARCA4/NAP1L1/DNMT3A/NAP1L2	39
BP	GO:0051169	nuclear transport	49/765	346/18670	2.87645e-14	1.2848e-12	1.07491e-12	ECT2/GTSE1/NUP107/CSE1L/NUP188/TRIM28/NUP205/SNRPB/IPO5/NUP155/PPP1CC/ANP32B/HNRNPA1/NUP37/DHX9/SRSF2/NUP35/NUP62/KPNA2/BARD1/U2AF2/SRSF1/SNRPF/NUP88/MAGOHB/POLR2D/SNRPD1/XPO1/XPO5/CPSF3/ANP32A/NUP50/SRSF3/NUP160/NUP210/NPM1/NUP93/PHB2/CPSF6/GEMIN4/AAAS/CTDSPL2/RAN/SNRPE/SRSF6/RBM15B/THOC3/SRSF9/SRSF7	49
BP	GO:0051236	establishment of RNA localization	36/765	196/18670	2.90332e-14	1.2848e-12	1.07491e-12	IGF2BP3/NUP107/NUP188/NUP205/NUP155/HNRNPA1/NUP37/HNRNPA3/DHX9/SRSF2/NUP35/NUP62/U2AF2/SRSF1/NUP88/MAGOHB/POLR2D/XPO1/XPO5/CPSF3/NUP50/SRSF3/NUP160/NUP210/NPM1/NUP93/CPSF6/AAAS/RAN/SRSF6/RBM15B/THOC3/SRSF9/HNRNPU/SRSF7/CKAP5	36
BP	GO:2001251	negative regulation of chromosome organization	31/765	146/18670	2.99577e-14	1.31065e-12	1.09654e-12	BUB1/TTK/CENPF/BUB1B/NDC80/CCNB1/TOP2A/PTTG1/ATAD2/PLK1/FBXO5/CDC20/MAD2L1/ESPL1/AURKB/BRCA1/TRIP13/MCM2/GEN1/DNMT1/CDK5RAP2/CDT1/XRCC3/HNRNPA1/SET/XRCC5/TET1/PARP1/KDM1A/BCOR/HNRNPU	31
BP	GO:0033046	negative regulation of sister chromatid segregation	18/765	44/18670	3.29279e-14	1.42441e-12	1.19171e-12	BUB1/TTK/CENPF/BUB1B/NDC80/CCNB1/PTTG1/PLK1/FBXO5/CDC20/MAD2L1/ESPL1/AURKB/TRIP13/GEN1/CDK5RAP2/CDT1/XRCC3	18
BP	GO:2000816	negative regulation of mitotic sister chromatid separation	17/765	39/18670	4.75712e-14	2.03499e-12	1.70255e-12	BUB1/TTK/CENPF/BUB1B/NDC80/CCNB1/PTTG1/PLK1/FBXO5/CDC20/MAD2L1/AURKB/TRIP13/GEN1/CDK5RAP2/CDT1/XRCC3	17
BP	GO:0051985	negative regulation of chromosome segregation	18/765	45/18670	5.2801e-14	2.23389e-12	1.86895e-12	BUB1/TTK/CENPF/BUB1B/NDC80/CCNB1/PTTG1/PLK1/FBXO5/CDC20/MAD2L1/ESPL1/AURKB/TRIP13/GEN1/CDK5RAP2/CDT1/XRCC3	18
BP	GO:0006611	protein export from nucleus	34/765	179/18670	5.46957e-14	2.28889e-12	1.91497e-12	GTSE1/NUP107/CSE1L/NUP188/NUP205/NUP155/ANP32B/NUP37/SRSF2/NUP35/NUP62/BARD1/U2AF2/SRSF1/NUP88/MAGOHB/POLR2D/XPO1/XPO5/CPSF3/NUP50/SRSF3/NUP160/NUP210/NPM1/NUP93/AAAS/CTDSPL2/RAN/SRSF6/RBM15B/THOC3/SRSF9/SRSF7	34
BP	GO:0045839	negative regulation of mitotic nuclear division	19/765	52/18670	7.4487e-14	3.0836e-12	2.57985e-12	BUB1/TTK/CENPF/BUB1B/NDC80/CCNB1/PTTG1/PLK1/FBXO5/CDC20/MAD2L1/AURKB/TRIP13/CHEK1/GEN1/CDK5RAP2/CDT1/MTBP/XRCC3	19
BP	GO:1905819	negative regulation of chromosome separation	17/765	40/18670	7.96044e-14	3.26039e-12	2.72777e-12	BUB1/TTK/CENPF/BUB1B/NDC80/CCNB1/PTTG1/PLK1/FBXO5/CDC20/MAD2L1/AURKB/TRIP13/GEN1/CDK5RAP2/CDT1/XRCC3	17
BP	GO:0045931	positive regulation of mitotic cell cycle	32/765	163/18670	1.16573e-13	4.72428e-12	3.95251e-12	DLGAP5/NDC80/NUSAP1/CCNB1/CDK1/DTL/UBE2C/BRCA2/FBXO5/CDC45/MAD2L1/ESPL1/AURKA/CDC6/CDC25C/CDCA5/CDC25A/KIF20B/GEN1/CDC7/CDT1/MTBP/CDK4/XRCC3/NUP62/RANBP1/RCC2/PHB2/RAD51C/APEX1/HNRNPU/EIF4EBP1	32
BP	GO:0051784	negative regulation of nuclear division	20/765	60/18670	1.24497e-13	4.99283e-12	4.17719e-12	BUB1/TTK/CENPF/BUB1B/NDC80/CCNB1/PTTG1/PLK1/FBXO5/CDC20/MAD2L1/AURKB/TRIP13/CHEK1/FBXO43/GEN1/CDK5RAP2/CDT1/MTBP/XRCC3	20
BP	GO:0045005	DNA-dependent DNA replication maintenance of fidelity	17/765	41/18670	1.3085e-13	5.19351e-12	4.34509e-12	BLM/BRCA2/RAD51/PCNA/TIMELESS/MMS22L/POLE/EME1/RFWD3/DNA2/GEN1/FANCM/DDX11/POLD1/ZRANB3/TIPIN/DONSON	17
BP	GO:0000727	double-strand break repair via break-induced replication	10/765	11/18670	1.33562e-13	5.24707e-12	4.38989e-12	CDC45/MCM6/GINS2/MCM3/MCM2/MCM4/MCM5/MCM7/CDC7/GINS4	10
BP	GO:0071897	DNA biosynthetic process	35/765	196/18670	1.59005e-13	6.18354e-12	5.17338e-12	CENPF/DTL/TYMS/POLQ/PCNA/POLE2/DSCC1/AURKB/RFC4/POLE/POLA2/RFC3/RFC5/NEK2/LIN9/TK1/POLA1/LIG1/POLH/RFC2/POLD1/POLD2/HNRNPA1/WRAP53/DKC1/HNRNPD/XRCC5/NVL/CCT7/CCT2/CCT5/LIG3/POLD3/CCT3/HNRNPU	35
BP	GO:0070507	regulation of microtubule cytoskeleton organization	34/765	186/18670	1.75612e-13	6.76107e-12	5.65656e-12	TPX2/KIF11/SKA3/KIF18A/PLK4/PLK1/SKA1/AURKA/BRCA1/SPAG5/STIL/CHEK1/TACC3/CKAP2/NEK2/POC1A/GEN1/CENPJ/CCNF/CDK5RAP2/SMC1A/XRCC3/NUP62/PSRC1/RANBP1/SMC3/XPO1/NPM1/SKA2/ALMS1/CEP76/HNRNPU/EML2/MAP1A	34
BP	GO:0045841	negative regulation of mitotic metaphase/anaphase transition	16/765	36/18670	1.83633e-13	6.99988e-12	5.85636e-12	BUB1/TTK/CENPF/BUB1B/NDC80/CCNB1/PLK1/FBXO5/CDC20/MAD2L1/AURKB/TRIP13/GEN1/CDK5RAP2/CDT1/XRCC3	16
BP	GO:0071426	ribonucleoprotein complex export from nucleus	28/765	127/18670	1.96584e-13	7.42008e-12	6.20791e-12	NUP107/NUP188/NUP205/NUP155/NUP37/SRSF2/NUP35/NUP62/U2AF2/SRSF1/NUP88/MAGOHB/POLR2D/XPO1/CPSF3/NUP50/SRSF3/NUP160/NUP210/NPM1/NUP93/AAAS/RAN/SRSF6/RBM15B/THOC3/SRSF9/SRSF7	28
BP	GO:0031055	chromatin remodeling at centromere	18/765	48/18670	2.00336e-13	7.48829e-12	6.26498e-12	HJURP/CENPK/CENPI/OIP5/CENPA/CENPO/CENPH/HELLS/CENPM/CENPL/NASP/CENPV/CENPN/ITGB3BP/CENPQ/CENPP/RUVBL1/NPM1	18
BP	GO:0033048	negative regulation of mitotic sister chromatid segregation	17/765	42/18670	2.11517e-13	7.8302e-12	6.55104e-12	BUB1/TTK/CENPF/BUB1B/NDC80/CCNB1/PTTG1/PLK1/FBXO5/CDC20/MAD2L1/AURKB/TRIP13/GEN1/CDK5RAP2/CDT1/XRCC3	17
BP	GO:0090305	nucleic acid phosphodiester bond hydrolysis	44/765	302/18670	2.23881e-13	8.20898e-12	6.86794e-12	EXO1/PCNA/RFC4/RNASEH2A/HMGB2/POLE/RFC3/EME1/RFC5/ATAD5/FEN1/DNA2/GEN1/FANCM/DCLRE1B/RBBP8/RFC2/TDP1/EXOSC2/POLD1/G3BP1/POLD2/ZRANB3/POP1/EXOSC8/XRN2/DGCR8/EXOSC9/CNOT1/CPSF3/PARP1/HMGB1/CNOT6/CPSF6/EDC3/APEX1/APAF1/ENDOG/POLD3/RPS21/N4BP2/ERI2/RNASEH2B/ENDOD1	44
BP	GO:0071166	ribonucleoprotein complex localization	28/765	128/18670	2.42025e-13	8.79052e-12	7.35448e-12	NUP107/NUP188/NUP205/NUP155/NUP37/SRSF2/NUP35/NUP62/U2AF2/SRSF1/NUP88/MAGOHB/POLR2D/XPO1/CPSF3/NUP50/SRSF3/NUP160/NUP210/NPM1/NUP93/AAAS/RAN/SRSF6/RBM15B/THOC3/SRSF9/SRSF7	28
BP	GO:0061982	meiosis I cell cycle process	27/765	119/18670	2.53631e-13	9.12596e-12	7.63512e-12	TOP2A/PTTG1/BRIP1/PLK1/BRCA2/FBXO5/RAD51/ESPL1/AURKA/TRIP13/FANCD2/RAD54L/CDC25C/CDC25A/EME1/MND1/RAD54B/CKS2/MYBL1/MSH6/FANCM/CCNE2/PSMC3IP/TEX15/MSH5/RMI1/RAD51C	27
BP	GO:0007099	centriole replication	16/765	37/18670	3.1134e-13	1.09969e-11	9.20038e-12	PLK4/BRCA1/STIL/WDR62/CEP152/CENPJ/CEP72/CDK2/CEP135/CDK5RAP2/SASS6/RTTN/NUP62/NPM1/ALMS1/CEP76	16
BP	GO:1902100	negative regulation of metaphase/anaphase transition of cell cycle	16/765	37/18670	3.1134e-13	1.09969e-11	9.20038e-12	BUB1/TTK/CENPF/BUB1B/NDC80/CCNB1/PLK1/FBXO5/CDC20/MAD2L1/AURKB/TRIP13/GEN1/CDK5RAP2/CDT1/XRCC3	16
BP	GO:0090307	mitotic spindle assembly	19/765	56/18670	3.54881e-13	1.24208e-11	1.03917e-11	TPX2/KIF23/KIF11/KIF4A/RACGAP1/KIFC1/PLK1/MYBL2/CDC20/BIRC5/AURKB/NEK2/CHEK2/SMC1A/SMC3/CEP192/AAAS/MZT1/HNRNPU	19
BP	GO:0097711	ciliary basal body-plasma membrane docking	24/765	95/18670	4.38092e-13	1.51951e-11	1.27128e-11	CDK1/PLK4/PLK1/KIF24/HAUS8/NEK2/CEP152/CENPJ/CEP72/HAUS6/CEP135/CEP78/CDK5RAP2/HAUS1/SCLT1/NDE1/NEDD1/HAUS3/CEP192/HAUS5/ALMS1/HAUS7/CEP76/CKAP5	24
BP	GO:0051310	metaphase plate congression	19/765	57/18670	5.12135e-13	1.76046e-11	1.47287e-11	KIF14/CENPF/NDC80/CCNB1/KIF18A/NUF2/KIF2C/KIFC1/FAM83D/CENPE/SPAG5/CDCA5/CDCA8/KIF22/CDT1/CENPQ/NUP62/PSRC1/HNRNPU	19
BP	GO:0051028	mRNA transport	30/765	152/18670	5.92636e-13	2.01916e-11	1.6893e-11	IGF2BP3/NUP107/NUP188/NUP205/NUP155/HNRNPA1/NUP37/HNRNPA3/DHX9/SRSF2/NUP35/NUP62/U2AF2/SRSF1/NUP88/MAGOHB/POLR2D/XPO1/CPSF3/NUP50/SRSF3/NUP160/NUP210/NUP93/AAAS/SRSF6/RBM15B/THOC3/SRSF9/SRSF7	30
BP	GO:1902969	mitotic DNA replication	11/765	15/18670	5.98666e-13	2.02181e-11	1.69152e-11	BRCA2/RAD51/CDC45/GINS1/MCM6/MCM3/MCM2/MCM4/POLA1/LIG1/CHEK2	11
BP	GO:0043044	ATP-dependent chromatin remodeling	23/765	88/18670	6.18662e-13	2.07117e-11	1.73282e-11	HJURP/CENPK/CENPI/OIP5/CENPA/CENPO/CENPH/CENPM/CENPL/ACTL6A/NASP/CENPN/ITGB3BP/CENPQ/CENPP/HDAC2/ANP32E/RUVBL1/PTMA/SMARCC1/NPM1/SMARCA4/SMARCAD1	23
BP	GO:0046605	regulation of centrosome cycle	19/765	58/18670	7.32757e-13	2.43199e-11	2.0347e-11	KIF11/PLK4/AURKA/BRCA1/STIL/CHEK1/NEK2/POC1A/GEN1/CENPJ/CCNF/CDK5RAP2/XRCC3/NUP62/RANBP1/XPO1/NPM1/ALMS1/CEP76	19
BP	GO:0007094	mitotic spindle assembly checkpoint	15/765	34/18670	1.20801e-12	3.87569e-11	3.24254e-11	BUB1/TTK/CENPF/BUB1B/NDC80/CCNB1/PLK1/CDC20/MAD2L1/AURKB/TRIP13/GEN1/CDK5RAP2/CDT1/XRCC3	15
BP	GO:0031577	spindle checkpoint	15/765	34/18670	1.20801e-12	3.87569e-11	3.24254e-11	BUB1/TTK/CENPF/BUB1B/NDC80/CCNB1/PLK1/CDC20/MAD2L1/AURKB/TRIP13/GEN1/CDK5RAP2/CDT1/XRCC3	15
BP	GO:0071173	spindle assembly checkpoint	15/765	34/18670	1.20801e-12	3.87569e-11	3.24254e-11	BUB1/TTK/CENPF/BUB1B/NDC80/CCNB1/PLK1/CDC20/MAD2L1/AURKB/TRIP13/GEN1/CDK5RAP2/CDT1/XRCC3	15
BP	GO:0071174	mitotic spindle checkpoint	15/765	34/18670	1.20801e-12	3.87569e-11	3.24254e-11	BUB1/TTK/CENPF/BUB1B/NDC80/CCNB1/PLK1/CDC20/MAD2L1/AURKB/TRIP13/GEN1/CDK5RAP2/CDT1/XRCC3	15
BP	GO:0098534	centriole assembly	16/765	40/18670	1.35423e-12	4.30892e-11	3.60501e-11	PLK4/BRCA1/STIL/WDR62/CEP152/CENPJ/CEP72/CDK2/CEP135/CDK5RAP2/SASS6/RTTN/NUP62/NPM1/ALMS1/CEP76	16
BP	GO:0051303	establishment of chromosome localization	21/765	75/18670	1.44793e-12	4.56929e-11	3.82284e-11	KIF14/DLGAP5/CENPF/NDC80/CCNB1/KIF18A/NUF2/KIF2C/KIFC1/FAM83D/CENPE/SPAG5/CDCA5/CDCA8/KIF22/CDT1/CENPQ/NUP62/PSRC1/NDE1/HNRNPU	21
BP	GO:0036297	interstrand cross-link repair	18/765	53/18670	1.46012e-12	4.5703e-11	3.82368e-11	FANCI/RAD51/RAD51AP1/FANCD2/UBE2T/FANCA/FANCB/MCM8/EME1/RFWD3/FANCG/MSH6/FANCM/DCLRE1B/FANCC/XRCC3/USP1/ATRIP	18
BP	GO:0050000	chromosome localization	21/765	76/18670	1.92474e-12	5.97602e-11	4.99976e-11	KIF14/DLGAP5/CENPF/NDC80/CCNB1/KIF18A/NUF2/KIF2C/KIFC1/FAM83D/CENPE/SPAG5/CDCA5/CDCA8/KIF22/CDT1/CENPQ/NUP62/PSRC1/NDE1/HNRNPU	21
BP	GO:0031497	chromatin assembly	34/765	202/18670	2.04204e-12	6.28949e-11	5.26202e-11	HJURP/CENPK/CENPI/OIP5/MCM2/HMGB2/CENPA/CENPO/CENPH/HELLS/ASF1B/CHAF1A/CENPM/CENPL/DNMT1/CHAF1B/NASP/CENPV/TRIM28/CENPN/CTCF/ITGB3BP/CENPQ/CENPP/ANP32B/SET/RUVBL1/BEND3/TET1/SUV39H1/NPM1/NAP1L1/DNMT3A/NAP1L2	34
BP	GO:0006406	mRNA export from nucleus	25/765	111/18670	2.32584e-12	7.05076e-11	5.89893e-11	NUP107/NUP188/NUP205/NUP155/NUP37/SRSF2/NUP35/NUP62/U2AF2/SRSF1/NUP88/MAGOHB/POLR2D/CPSF3/NUP50/SRSF3/NUP160/NUP210/NUP93/AAAS/SRSF6/RBM15B/THOC3/SRSF9/SRSF7	25
BP	GO:0071427	mRNA-containing ribonucleoprotein complex export from nucleus	25/765	111/18670	2.32584e-12	7.05076e-11	5.89893e-11	NUP107/NUP188/NUP205/NUP155/NUP37/SRSF2/NUP35/NUP62/U2AF2/SRSF1/NUP88/MAGOHB/POLR2D/CPSF3/NUP50/SRSF3/NUP160/NUP210/NUP93/AAAS/SRSF6/RBM15B/THOC3/SRSF9/SRSF7	25
BP	GO:2000104	negative regulation of DNA-dependent DNA replication	13/765	25/18670	2.73787e-12	8.235e-11	6.88971e-11	BLM/BRCA2/FBXO5/TIMELESS/GMNN/CHEK2/MSH6/SMC1A/ZRANB3/TIPIN/SMC3/DONSON/LIG3	13
BP	GO:0034728	nucleosome organization	32/765	184/18670	3.69665e-12	1.10326e-10	9.2303e-11	HJURP/CENPK/CENPI/OIP5/MCM2/HMGB2/CENPA/CENPO/CENPH/ASF1B/CHAF1A/CENPM/CENPL/CHAF1B/NASP/CENPN/CTCF/ITGB3BP/CENPQ/CENPP/ANP32B/ANP32E/SET/RUVBL1/PTMA/SMARCC1/ARID2/NPM1/SMARCD1/SMARCA4/NAP1L1/NAP1L2	32
BP	GO:0032886	regulation of microtubule-based process	35/765	218/18670	3.94911e-12	1.16954e-10	9.78483e-11	TPX2/KIF11/SKA3/KIF18A/PLK4/PLK1/SKA1/AURKA/BRCA1/SPAG5/STIL/CHEK1/TACC3/CKAP2/NEK2/POC1A/GEN1/CENPJ/CCNF/CDK5RAP2/SMC1A/XRCC3/NUP62/PSRC1/RANBP1/SMC3/XPO1/NPM1/SKA2/ALMS1/CEP76/HNRNPU/EML2/MAP1A/HAP1	35
BP	GO:0042770	signal transduction in response to DNA damage	27/765	133/18670	4.25967e-12	1.25189e-10	1.04738e-10	CCNB1/CDK1/DTL/GTSE1/FOXM1/PLK1/BRCA2/PCNA/AURKA/BRCA1/E2F8/CHEK1/CDC25C/E2F1/E2F7/ATAD5/CHEK2/CDK2/PRKDC/CASP2/PRMT1/CNOT1/KDM1A/CNOT6/PPM1D/PAXIP1/PLA2R1	27
BP	GO:0044773	mitotic DNA damage checkpoint	23/765	97/18670	5.64129e-12	1.64236e-10	1.37406e-10	CCNB1/CDK1/GTSE1/BLM/PCNA/AURKA/E2F8/CDC25C/CLSPN/E2F1/EME1/E2F7/RFWD3/CHEK2/CDK2/MSH2/PRKDC/TIPIN/CASP2/PRMT1/CNOT1/CNOT6/DONSON	23
BP	GO:1901989	positive regulation of cell cycle phase transition	24/765	106/18670	5.67362e-12	1.64236e-10	1.37406e-10	DLGAP5/CCNB1/CDK1/DTL/UBE2C/FBXO5/FAM83D/CDC45/ESPL1/CDC6/CDC25C/CDCA5/CDC25A/EZH2/ATAD5/CDC7/CDT1/MTBP/CDK4/RCC2/NPM1/PHB2/RAD51C/APEX1	24
BP	GO:0034080	CENP-A containing nucleosome assembly	16/765	44/18670	7.69934e-12	2.16898e-10	1.81465e-10	HJURP/CENPK/CENPI/OIP5/CENPA/CENPO/CENPH/CENPM/CENPL/NASP/CENPN/ITGB3BP/CENPQ/CENPP/RUVBL1/NPM1	16
BP	GO:0061641	CENP-A containing chromatin organization	16/765	44/18670	7.69934e-12	2.16898e-10	1.81465e-10	HJURP/CENPK/CENPI/OIP5/CENPA/CENPO/CENPH/CENPM/CENPL/NASP/CENPN/ITGB3BP/CENPQ/CENPP/RUVBL1/NPM1	16
BP	GO:0072401	signal transduction involved in DNA integrity checkpoint	20/765	73/18670	7.7182e-12	2.16898e-10	1.81465e-10	CCNB1/CDK1/DTL/GTSE1/PLK1/PCNA/AURKA/BRCA1/E2F8/CHEK1/CDC25C/E2F1/E2F7/CHEK2/CDK2/PRKDC/CASP2/PRMT1/CNOT1/CNOT6	20
BP	GO:0072422	signal transduction involved in DNA damage checkpoint	20/765	73/18670	7.7182e-12	2.16898e-10	1.81465e-10	CCNB1/CDK1/DTL/GTSE1/PLK1/PCNA/AURKA/BRCA1/E2F8/CHEK1/CDC25C/E2F1/E2F7/CHEK2/CDK2/PRKDC/CASP2/PRMT1/CNOT1/CNOT6	20
BP	GO:0097064	ncRNA export from nucleus	15/765	38/18670	8.63847e-12	2.41001e-10	2.0163e-10	NUP107/NUP188/NUP205/NUP155/NUP37/NUP35/NUP62/NUP88/NUP50/NUP160/NUP210/NPM1/NUP93/AAAS/RAN	15
BP	GO:0072395	signal transduction involved in cell cycle checkpoint	20/765	74/18670	1.01754e-11	2.81837e-10	2.35795e-10	CCNB1/CDK1/DTL/GTSE1/PLK1/PCNA/AURKA/BRCA1/E2F8/CHEK1/CDC25C/E2F1/E2F7/CHEK2/CDK2/PRKDC/CASP2/PRMT1/CNOT1/CNOT6	20
BP	GO:1901796	regulation of signal transduction by p53 class mediator	31/765	180/18670	1.0471e-11	2.87952e-10	2.40911e-10	TPX2/EXO1/BRIP1/BLM/AURKA/AURKB/BRCA1/RFC4/CHEK1/RFC3/RFC5/ATAD5/TOPBP1/DNA2/CHEK2/CDK2/TAF5/RBBP8/RFC2/HDAC2/SSRP1/BARD1/TOP3A/ATRIP/RPS7/EHMT2/TRIM24/KDM1A/RMI1/NOP2/PLA2R1	31
BP	GO:0043486	histone exchange	18/765	60/18670	1.59555e-11	4.35664e-10	3.64492e-10	HJURP/CENPK/CENPI/OIP5/CENPA/CENPO/CENPH/CENPM/CENPL/NASP/CENPN/ITGB3BP/CENPQ/CENPP/ANP32E/RUVBL1/PTMA/NPM1	18
BP	GO:0015931	nucleobase-containing compound transport	36/765	241/18670	1.68575e-11	4.57052e-10	3.82387e-10	IGF2BP3/NUP107/NUP188/NUP205/NUP155/HNRNPA1/NUP37/HNRNPA3/DHX9/SRSF2/NUP35/NUP62/U2AF2/SRSF1/NUP88/MAGOHB/POLR2D/XPO1/XPO5/CPSF3/NUP50/SRSF3/NUP160/NUP210/NPM1/NUP93/CPSF6/AAAS/RAN/SRSF6/RBM15B/THOC3/SRSF9/HNRNPU/SRSF7/CKAP5	36
BP	GO:0006409	tRNA export from nucleus	14/765	34/18670	2.17173e-11	5.80637e-10	4.85782e-10	NUP107/NUP188/NUP205/NUP155/NUP37/NUP35/NUP62/NUP88/NUP50/NUP160/NUP210/NUP93/AAAS/RAN	14
BP	GO:0071431	tRNA-containing ribonucleoprotein complex export from nucleus	14/765	34/18670	2.17173e-11	5.80637e-10	4.85782e-10	NUP107/NUP188/NUP205/NUP155/NUP37/NUP35/NUP62/NUP88/NUP50/NUP160/NUP210/NUP93/AAAS/RAN	14
BP	GO:0006336	DNA replication-independent nucleosome assembly	17/765	54/18670	2.46704e-11	6.55041e-10	5.48032e-10	HJURP/CENPK/CENPI/OIP5/CENPA/CENPO/CENPH/ASF1B/CENPM/CENPL/NASP/CENPN/ITGB3BP/CENPQ/CENPP/RUVBL1/NPM1	17
BP	GO:0007127	meiosis I	24/765	114/18670	2.95263e-11	7.78603e-10	6.51408e-10	TOP2A/PTTG1/BRIP1/PLK1/BRCA2/FBXO5/RAD51/ESPL1/AURKA/TRIP13/FANCD2/RAD54L/EME1/MND1/RAD54B/CKS2/MYBL1/FANCM/CCNE2/PSMC3IP/TEX15/MSH5/RMI1/RAD51C	24
BP	GO:0034724	DNA replication-independent nucleosome organization	17/765	55/18670	3.43588e-11	8.99874e-10	7.52868e-10	HJURP/CENPK/CENPI/OIP5/CENPA/CENPO/CENPH/ASF1B/CENPM/CENPL/NASP/CENPN/ITGB3BP/CENPQ/CENPP/RUVBL1/NPM1	17
BP	GO:0009314	response to radiation	51/765	448/18670	4.08369e-11	1.06231e-09	8.88768e-10	PBK/DTL/ECT2/BLM/BRCA2/RAD51/RAD51AP1/PCNA/AURKB/BRCA1/XRCC2/FANCD2/CHEK1/RAD54L/CDC25A/FEN1/TOPBP1/RFWD3/FANCG/CHEK2/MSH6/RAD18/RRM1/FIGNL1/MSH2/SMC1A/POLH/PRKDC/INTS7/POLD1/PPP1CC/USP1/ZRANB3/TIPIN/XRCC5/MTA1/PARP1/NPM1/KDM1A/NHEJ1/PPM1D/HMGN1/PAXIP1/ERCC8/POLD3/RUVBL2/IKBIP/DNMT3A/NDRG4/CRYAB/ATP1A2	51
BP	GO:0010212	response to ionizing radiation	27/765	147/18670	4.91833e-11	1.27084e-09	1.06323e-09	ECT2/BLM/BRCA2/RAD51/RAD51AP1/BRCA1/XRCC2/FANCD2/RAD54L/TOPBP1/RFWD3/CHEK2/RRM1/FIGNL1/MSH2/PRKDC/INTS7/XRCC5/MTA1/PARP1/KDM1A/NHEJ1/PAXIP1/ERCC8/IKBIP/DNMT3A/CRYAB	27
BP	GO:2001020	regulation of response to DNA damage stimulus	33/765	214/18670	4.98026e-11	1.27827e-09	1.06945e-09	FOXM1/FBXO5/RAD51/RAD51AP1/POLQ/PCNA/TIMELESS/BRCA1/CHEK1/FANCB/WDR76/ATAD5/RFWD3/CHEK2/DEK/FIGNL1/TRIM28/POLH/PRKDC/DDX11/TEX15/USP1/DHX9/WRAP53/PARP1/HMGB1/KDM1A/PAXIP1/ERCC8/FUS/RNASEH2B/CLU/PLA2R1	33
BP	GO:0051031	tRNA transport	14/765	36/18670	5.48736e-11	1.3991e-09	1.17053e-09	NUP107/NUP188/NUP205/NUP155/NUP37/NUP35/NUP62/NUP88/NUP50/NUP160/NUP210/NUP93/AAAS/RAN	14
BP	GO:0007080	mitotic metaphase plate congression	15/765	44/18670	1.02012e-10	2.58385e-09	2.16174e-09	KIF14/NDC80/CCNB1/KIF18A/NUF2/KIF2C/KIFC1/CENPE/CDCA5/CDCA8/KIF22/CDT1/NUP62/PSRC1/HNRNPU	15
BP	GO:0051383	kinetochore organization	11/765	21/18670	1.23386e-10	3.10482e-09	2.59761e-09	CENPF/NDC80/NUF2/CENPK/CENPE/SMC4/CENPA/CENPH/SMC2/CDT1/CENPN	11
BP	GO:0006282	regulation of DNA repair	24/765	122/18670	1.32439e-10	3.31097e-09	2.77008e-09	FOXM1/RAD51/RAD51AP1/POLQ/PCNA/TIMELESS/BRCA1/CHEK1/FANCB/DEK/FIGNL1/TRIM28/POLH/PRKDC/DDX11/TEX15/USP1/DHX9/WRAP53/PARP1/HMGB1/KDM1A/ERCC8/FUS	24
BP	GO:0008608	attachment of spindle microtubules to kinetochore	13/765	32/18670	1.40118e-10	3.48034e-09	2.91178e-09	NDC80/CCNB1/NUF2/ECT2/RACGAP1/KIF2C/CENPE/AURKB/SPAG5/NEK2/CDT1/RCC2/HNRNPU	13
BP	GO:0008156	negative regulation of DNA replication	14/765	40/18670	2.87944e-10	7.1063e-09	5.9454e-09	BLM/BRCA2/FBXO5/TIMELESS/GMNN/CDC6/CHEK2/MSH6/SMC1A/ZRANB3/TIPIN/SMC3/DONSON/LIG3	14
BP	GO:0030330	DNA damage response, signal transduction by p53 class mediator	22/765	107/18670	3.19156e-10	7.82644e-09	6.54789e-09	CCNB1/CDK1/GTSE1/FOXM1/BRCA2/PCNA/AURKA/BRCA1/E2F8/CDC25C/E2F1/E2F7/CHEK2/CDK2/CASP2/PRMT1/CNOT1/KDM1A/CNOT6/PPM1D/PAXIP1/PLA2R1	22
BP	GO:0031571	mitotic G1 DNA damage checkpoint	17/765	63/18670	3.74859e-10	9.07678e-09	7.59397e-09	CCNB1/CDK1/GTSE1/PCNA/AURKA/E2F8/CDC25C/E2F1/E2F7/RFWD3/CHEK2/CDK2/PRKDC/CASP2/PRMT1/CNOT1/CNOT6	17
BP	GO:0044819	mitotic G1/S transition checkpoint	17/765	63/18670	3.74859e-10	9.07678e-09	7.59397e-09	CCNB1/CDK1/GTSE1/PCNA/AURKA/E2F8/CDC25C/E2F1/E2F7/RFWD3/CHEK2/CDK2/PRKDC/CASP2/PRMT1/CNOT1/CNOT6	17
BP	GO:0070317	negative regulation of G0 to G1 transition	14/765	41/18670	4.20877e-10	1.01274e-08	8.47292e-09	RAD51/RRM2/BRCA1/CHEK1/E2F1/EZH2/CDC7/RBBP8/CBX5/CBX3/EHMT2/SUZ12/APAF1/PPP2R5B	14
BP	GO:0006297	nucleotide-excision repair, DNA gap filling	11/765	23/18670	4.3867e-10	1.04899e-08	8.77626e-09	PCNA/RFC4/POLE/RFC3/RFC5/LIG1/RFC2/POLD1/POLD2/LIG3/POLD3	11
BP	GO:0000281	mitotic cytokinesis	18/765	72/18670	4.49971e-10	1.06938e-08	8.94679e-09	KIF20A/KIF23/ANLN/KIF4A/NUSAP1/ECT2/RACGAP1/CEP55/PLK1/BRCA2/ESPL1/CENPA/CKAP2/KIF20B/INCENP/CDT1/CIT/NUP62	18
BP	GO:0045132	meiotic chromosome segregation	20/765	90/18670	4.74424e-10	1.12057e-08	9.37512e-09	BUB1/NCAPH/TTK/BUB1B/NUF2/TOP2A/PTTG1/BRIP1/PLK1/ESPL1/SMC4/TRIP13/FANCD2/EME1/SMC2/FANCM/CCNE2/TEX15/RMI1/RAD51C	20
BP	GO:0044783	G1 DNA damage checkpoint	17/765	64/18670	4.91188e-10	1.14146e-08	9.5499e-09	CCNB1/CDK1/GTSE1/PCNA/AURKA/E2F8/CDC25C/E2F1/E2F7/RFWD3/CHEK2/CDK2/PRKDC/CASP2/PRMT1/CNOT1/CNOT6	17
BP	GO:0000377	RNA splicing, via transesterification reactions with bulged adenosine as nucleophile	44/765	379/18670	4.92163e-10	1.14146e-08	9.5499e-09	SNRPA/SRPK1/HNRNPUL1/RBMX/SNRPB/RBM15/HNRNPA1/SNRNP200/HNRNPA3/HNRNPA0/DHX9/SRSF2/HNRNPL/LSM5/PTBP1/U2AF2/SRSF1/SYNCRIP/USP49/PCBP2/ELAVL1/SNRPF/HNRNPD/HNRNPR/MAGOHB/POLR2D/SNRPD1/DHX35/DAZAP1/CPSF3/SRSF3/DHX15/KDM1A/USP39/GEMIN4/SF3B3/RBM10/SNRPE/SRSF6/RBM15B/SRSF9/FUS/HNRNPU/SRSF7	44
BP	GO:0000398	mRNA splicing, via spliceosome	44/765	379/18670	4.92163e-10	1.14146e-08	9.5499e-09	SNRPA/SRPK1/HNRNPUL1/RBMX/SNRPB/RBM15/HNRNPA1/SNRNP200/HNRNPA3/HNRNPA0/DHX9/SRSF2/HNRNPL/LSM5/PTBP1/U2AF2/SRSF1/SYNCRIP/USP49/PCBP2/ELAVL1/SNRPF/HNRNPD/HNRNPR/MAGOHB/POLR2D/SNRPD1/DHX35/DAZAP1/CPSF3/SRSF3/DHX15/KDM1A/USP39/GEMIN4/SF3B3/RBM10/SNRPE/SRSF6/RBM15B/SRSF9/FUS/HNRNPU/SRSF7	44
BP	GO:0000083	regulation of transcription involved in G1/S transition of mitotic cell cycle	12/765	29/18670	5.61495e-10	1.29446e-08	1.083e-08	FBXO5/TYMS/CDC45/PCNA/RRM2/CDC6/DHFR/E2F1/E2F7/ORC1/POLA1/CDT1	12
BP	GO:1901992	positive regulation of mitotic cell cycle phase transition	20/765	91/18670	5.85014e-10	1.34066e-08	1.12164e-08	DLGAP5/CCNB1/CDK1/DTL/UBE2C/FBXO5/CDC45/ESPL1/CDC6/CDC25C/CDCA5/CDC25A/CDC7/CDT1/MTBP/CDK4/RCC2/PHB2/RAD51C/APEX1	20
BP	GO:0000375	RNA splicing, via transesterification reactions	44/765	382/18670	6.32835e-10	1.44167e-08	1.20615e-08	SNRPA/SRPK1/HNRNPUL1/RBMX/SNRPB/RBM15/HNRNPA1/SNRNP200/HNRNPA3/HNRNPA0/DHX9/SRSF2/HNRNPL/LSM5/PTBP1/U2AF2/SRSF1/SYNCRIP/USP49/PCBP2/ELAVL1/SNRPF/HNRNPD/HNRNPR/MAGOHB/POLR2D/SNRPD1/DHX35/DAZAP1/CPSF3/SRSF3/DHX15/KDM1A/USP39/GEMIN4/SF3B3/RBM10/SNRPE/SRSF6/RBM15B/SRSF9/FUS/HNRNPU/SRSF7	44
BP	GO:0072431	signal transduction involved in mitotic G1 DNA damage checkpoint	16/765	57/18670	6.49439e-10	1.45369e-08	1.21621e-08	CCNB1/CDK1/GTSE1/PCNA/AURKA/E2F8/CDC25C/E2F1/E2F7/CHEK2/CDK2/PRKDC/CASP2/PRMT1/CNOT1/CNOT6	16
BP	GO:0075733	intracellular transport of virus	16/765	57/18670	6.49439e-10	1.45369e-08	1.21621e-08	NUP107/NUP188/NUP205/NUP155/NUP37/NUP35/NUP62/KPNA2/NUP88/XPO1/NUP50/NUP160/NUP210/NUP93/AAAS/RAN	16
BP	GO:1902400	intracellular signal transduction involved in G1 DNA damage checkpoint	16/765	57/18670	6.49439e-10	1.45369e-08	1.21621e-08	CCNB1/CDK1/GTSE1/PCNA/AURKA/E2F8/CDC25C/E2F1/E2F7/CHEK2/CDK2/PRKDC/CASP2/PRMT1/CNOT1/CNOT6	16
BP	GO:0018205	peptidyl-lysine modification	45/765	397/18670	6.77189e-10	1.50704e-08	1.26084e-08	BRCA2/BRCA1/CHEK1/SUV39H2/EZH2/MYB/DNMT1/NUP107/TAF5/ACTL6A/NUP188/TRIM28/CTCF/NUP205/NUP155/HDAC2/NUP37/SAE1/NUP35/SET/RUVBL1/NUP62/PHF19/BAZ1A/DHPS/BEND3/SENP1/NUP88/DOT1L/SUV39H1/EHMT2/NUP50/SUZ12/NUP160/UBA2/NUP210/YEATS4/KDM1A/BCOR/NUP93/AAAS/PAXIP1/RUVBL2/UBE2I/NAP1L2	45
BP	GO:0010824	regulation of centrosome duplication	14/765	43/18670	8.67321e-10	1.91907e-08	1.60557e-08	PLK4/BRCA1/STIL/POC1A/GEN1/CENPJ/CCNF/CDK5RAP2/XRCC3/NUP62/XPO1/NPM1/ALMS1/CEP76	14
BP	GO:1902751	positive regulation of cell cycle G2/M phase transition	12/765	30/18670	9.01074e-10	1.98236e-08	1.65852e-08	CCNB1/CDK1/DTL/FBXO5/CDC25C/CDC25A/ATAD5/CDC7/CDK4/RCC2/NPM1/RAD51C	12
BP	GO:0006334	nucleosome assembly	25/765	145/18670	1.02668e-09	2.24586e-08	1.87897e-08	HJURP/CENPK/CENPI/OIP5/MCM2/HMGB2/CENPA/CENPO/CENPH/ASF1B/CHAF1A/CENPM/CENPL/CHAF1B/NASP/CENPN/ITGB3BP/CENPQ/CENPP/ANP32B/SET/RUVBL1/NPM1/NAP1L1/NAP1L2	25
BP	GO:2000573	positive regulation of DNA biosynthetic process	17/765	67/18670	1.06973e-09	2.32682e-08	1.9467e-08	DSCC1/AURKB/RFC4/RFC3/RFC5/NEK2/RFC2/HNRNPA1/WRAP53/DKC1/HNRNPD/XRCC5/NVL/CCT7/CCT2/CCT5/CCT3	17
BP	GO:0072413	signal transduction involved in mitotic cell cycle checkpoint	16/765	59/18670	1.13967e-09	2.43763e-08	2.03941e-08	CCNB1/CDK1/GTSE1/PCNA/AURKA/E2F8/CDC25C/E2F1/E2F7/CHEK2/CDK2/PRKDC/CASP2/PRMT1/CNOT1/CNOT6	16
BP	GO:1902402	signal transduction involved in mitotic DNA damage checkpoint	16/765	59/18670	1.13967e-09	2.43763e-08	2.03941e-08	CCNB1/CDK1/GTSE1/PCNA/AURKA/E2F8/CDC25C/E2F1/E2F7/CHEK2/CDK2/PRKDC/CASP2/PRMT1/CNOT1/CNOT6	16
BP	GO:1902403	signal transduction involved in mitotic DNA integrity checkpoint	16/765	59/18670	1.13967e-09	2.43763e-08	2.03941e-08	CCNB1/CDK1/GTSE1/PCNA/AURKA/E2F8/CDC25C/E2F1/E2F7/CHEK2/CDK2/PRKDC/CASP2/PRMT1/CNOT1/CNOT6	16
BP	GO:0140056	organelle localization by membrane tethering	27/765	169/18670	1.28291e-09	2.72885e-08	2.28306e-08	CDK1/PLK4/PLK1/KIF24/HAUS8/NEK2/CEP152/CENPJ/CEP72/HAUS6/CEP135/CEP78/CDK5RAP2/HAUS1/SCLT1/NDE1/NEDD1/HAUS3/CEP192/HAUS5/ALMS1/HAUS7/CEP76/CKAP5/SNPH/CAMK2A/NDRG4	27
BP	GO:0046794	transport of virus	16/765	60/18670	1.49561e-09	3.1638e-08	2.64695e-08	NUP107/NUP188/NUP205/NUP155/NUP37/NUP35/NUP62/KPNA2/NUP88/XPO1/NUP50/NUP160/NUP210/NUP93/AAAS/RAN	16
BP	GO:0070316	regulation of G0 to G1 transition	14/765	45/18670	1.71094e-09	3.59153e-08	3.0048e-08	RAD51/RRM2/BRCA1/CHEK1/E2F1/EZH2/CDC7/RBBP8/CBX5/CBX3/EHMT2/SUZ12/APAF1/PPP2R5B	14
BP	GO:1903311	regulation of mRNA metabolic process	39/765	324/18670	1.71647e-09	3.59153e-08	3.0048e-08	CCNB1/E2F1/IGF2BP3/SNRPA/SRPK1/RBMX/EXOSC2/RBM15/HNRNPA1/HNRNPA0/DHX9/SRSF2/SET/HNRNPL/BARD1/PTBP1/U2AF2/SRSF1/SYNCRIP/ELAVL1/EXOSC8/HNRNPD/HNRNPR/EXOSC9/CNOT1/XPO1/DAZAP1/ANP32A/SRSF3/NPM1/CPSF6/APEX1/RBM10/SRSF6/RBM15B/SRSF9/HNRNPU/SRSF7/SERBP1	39
BP	GO:0044766	multi-organism transport	16/765	61/18670	1.9511e-09	4.03858e-08	3.37882e-08	NUP107/NUP188/NUP205/NUP155/NUP37/NUP35/NUP62/KPNA2/NUP88/XPO1/NUP50/NUP160/NUP210/NUP93/AAAS/RAN	16
BP	GO:1902579	multi-organism localization	16/765	61/18670	1.9511e-09	4.03858e-08	3.37882e-08	NUP107/NUP188/NUP205/NUP155/NUP37/NUP35/NUP62/KPNA2/NUP88/XPO1/NUP50/NUP160/NUP210/NUP93/AAAS/RAN	16
BP	GO:0031297	replication fork processing	12/765	32/18670	2.18088e-09	4.49004e-08	3.75654e-08	BLM/BRCA2/RAD51/PCNA/MMS22L/EME1/RFWD3/DNA2/GEN1/FANCM/DDX11/ZRANB3	12
BP	GO:2001252	positive regulation of chromosome organization	27/765	174/18670	2.48115e-09	5.08109e-08	4.25103e-08	DLGAP5/CCNB1/ESPL1/AURKB/BRCA1/NEK2/MYB/FEN1/DNMT1/CDT1/TRIM28/DDX11/HNRNPA1/PHF19/DKC1/HNRNPD/XRCC5/TET1/KDM1A/CCT7/CCT2/CCT5/PAXIP1/RUVBL2/CCT3/HNRNPU/NAP1L2	27
BP	GO:0000076	DNA replication checkpoint	9/765	16/18670	2.7454e-09	5.59248e-08	4.67888e-08	CDC45/TIMELESS/CDC6/CLSPN/ORC1/TOPBP1/DNA2/CDT1/TIPIN	9
BP	GO:0071459	protein localization to chromosome, centromeric region	10/765	21/18670	2.94583e-09	5.96919e-08	4.99404e-08	TTK/NDC80/CDK1/AURKB/CENPA/CDT1/CTCF/MTBP/CENPQ/RCC2	10
BP	GO:0045023	G0 to G1 transition	14/765	47/18670	3.24571e-09	6.54241e-08	5.47362e-08	RAD51/RRM2/BRCA1/CHEK1/E2F1/EZH2/CDC7/RBBP8/CBX5/CBX3/EHMT2/SUZ12/APAF1/PPP2R5B	14
BP	GO:0007062	sister chromatid cohesion	16/765	63/18670	3.26476e-09	6.54652e-08	5.47706e-08	BUB1/BUB1B/ESCO2/PLK1/CDC20/DSCC1/ESPL1/CDCA5/KIF22/FEN1/SMC1A/CTCF/DDX11/SMC3/PHB2/RAD51C	16
BP	GO:0044380	protein localization to cytoskeleton	15/765	55/18670	3.4659e-09	6.91385e-08	5.78438e-08	TTK/ANLN/FAM83D/AURKA/SPAG5/STIL/KIF20B/CEP72/CCDC14/NUP62/NEDD1/CEP192/HNRNPU/HTR2A/MAP1A	15
BP	GO:1902806	regulation of cell cycle G1/S phase transition	29/765	202/18670	4.04426e-09	8.02598e-08	6.71483e-08	KIF14/CCNB1/CDK1/GTSE1/FAM83D/CDC45/PCNA/AURKA/CDC6/E2F8/CDC25C/E2F1/EZH2/E2F7/RFWD3/RBL1/WEE1/CHEK2/CDK2/PRKDC/MTBP/CDK4/CASP2/PRMT1/CNOT1/CNOT6/PHB2/APEX1/ATP2B4	29
BP	GO:0000018	regulation of DNA recombination	20/765	101/18670	4.06622e-09	8.02817e-08	6.71667e-08	BLM/RAD51/RAD51AP1/POLQ/TIMELESS/CHEK1/FANCB/ATAD5/MSH6/FIGNL1/MSH2/TEX15/WRAP53/KPNA2/ZRANB3/PARP1/KDM1A/SMARCAD1/PAXIP1/FUS	20
BP	GO:0022406	membrane docking	27/765	178/18670	4.12657e-09	8.10576e-08	6.78158e-08	CDK1/PLK4/PLK1/KIF24/HAUS8/NEK2/CEP152/CENPJ/CEP72/HAUS6/CEP135/CEP78/CDK5RAP2/HAUS1/SCLT1/NDE1/NEDD1/HAUS3/CEP192/HAUS5/ALMS1/HAUS7/CEP76/CKAP5/SNPH/CAMK2A/NDRG4	27
BP	GO:0016925	protein sumoylation	18/765	82/18670	4.32366e-09	8.4498e-08	7.06941e-08	NUP107/NUP188/TRIM28/NUP205/NUP155/NUP37/SAE1/NUP35/NUP62/SENP1/NUP88/NUP50/NUP160/UBA2/NUP210/NUP93/AAAS/UBE2I	18
BP	GO:0006977	DNA damage response, signal transduction by p53 class mediator resulting in cell cycle arrest	15/765	56/18670	4.55633e-09	8.85952e-08	7.41221e-08	CCNB1/CDK1/GTSE1/PCNA/AURKA/E2F8/CDC25C/E2F1/E2F7/CHEK2/CDK2/CASP2/PRMT1/CNOT1/CNOT6	15
BP	GO:0019080	viral gene expression	28/765	191/18670	4.66205e-09	9.01955e-08	7.54609e-08	NUP107/NUP188/RRP1B/NUP205/NUP155/NUP37/DHX9/NUP35/NUP62/PTBP1/PCBP2/NUP88/POLR2D/RPS15A/RPL6/RPS7/NUP50/NUP160/NUP210/RPLP0/NUP93/SMARCA4/RPL4/RPL18A/AAAS/RPS21/RPS24/RPS6	28
BP	GO:0031109	microtubule polymerization or depolymerization	21/765	112/18670	4.69869e-09	9.04497e-08	7.56736e-08	SKA3/KIF18A/KIF2C/FBXO5/SKA1/CKAP2/KIF24/KIF18B/CENPJ/CDK5RAP2/PSRC1/NDE1/CEP192/SKA2/MZT1/TUBGCP4/CKAP5/TPPP3/EML2/CRYAB/MAP1A	21
BP	GO:0010639	negative regulation of organelle organization	43/765	393/18670	4.79726e-09	9.18877e-08	7.68767e-08	BUB1/TTK/CENPF/BUB1B/NDC80/CCNB1/TOP2A/PTTG1/ATAD2/PLK1/FBXO5/CDC20/MAD2L1/ESPL1/AURKB/BRCA1/TRIP13/MCM2/CHEK1/CKAP2/FBXO43/NEK2/GEN1/DNMT1/CCNF/TMSB15A/CDK5RAP2/CDT1/MTBP/XRCC3/HNRNPA1/TMSB15B/SET/XRCC5/TET1/PARP1/NPM1/KDM1A/BCOR/ACAA2/HNRNPU/CLU/EML2	43
BP	GO:0031503	protein-containing complex localization	35/765	281/18670	4.82602e-09	9.1981e-08	7.69547e-08	BIRC5/CEP72/NUP107/NUP188/NUP205/NUP155/NUP37/SRSF2/NUP35/NUP62/U2AF2/SRSF1/RCC2/NUP88/MAGOHB/POLR2D/XPO1/CPSF3/NUP50/SRSF3/NUP160/NUP210/NPM1/NUP93/AAAS/RAN/MZT1/SRSF6/RBM15B/THOC3/SRSF9/HNRNPU/SRSF7/IQSEC2/CALY	35
BP	GO:0008380	RNA splicing	48/765	469/18670	5.45434e-09	1.03444e-07	8.65453e-08	TTF2/SNRPA/SRPK1/HNRNPUL1/RBMX/RRP1B/SNRPB/NONO/RBM15/HNRNPA1/SNRNP200/HNRNPA3/HNRNPA0/DHX9/SRSF2/HNRNPL/LSM5/PTBP1/U2AF2/SRSF1/SYNCRIP/USP49/PCBP2/ELAVL1/SNRPF/HNRNPD/HNRNPR/MAGOHB/POLR2D/SNRPD1/DHX35/DAZAP1/CPSF3/SRSF3/DHX15/KDM1A/USP39/GEMIN4/SF3B3/RBM10/SNRPE/SRSF6/RBM15B/THOC3/SRSF9/FUS/HNRNPU/SRSF7	48
BP	GO:0000910	cytokinesis	26/765	171/18670	7.59011e-09	1.43245e-07	1.19844e-07	KIF20A/KIF14/KIF23/ANLN/KIF4A/NUSAP1/ECT2/RACGAP1/CEP55/PLK1/BRCA2/PRC1/ESPL1/AURKA/AURKB/CDC6/E2F8/CENPA/CKAP2/KIF20B/E2F7/INCENP/CENPV/CDT1/CIT/NUP62	26
BP	GO:0031123	RNA 3'-end processing	24/765	150/18670	1.02781e-08	1.93029e-07	1.61495e-07	CCNB1/SNRPA/EXOSC2/LIN28B/INTS7/ZNF473/SRSF2/BARD1/U2AF2/SRSF1/EXOSC8/DKC1/EXOSC9/MAGOHB/POLR2D/CPSF3/SRSF3/CPSF6/FBL/RPS21/SRSF6/THOC3/SRSF9/SRSF7	24
BP	GO:0009112	nucleobase metabolic process	12/765	36/18670	1.0393e-08	1.94238e-07	1.62507e-07	TYMS/RRM1/PAICS/MTHFD1/UMPS/PPAT/GMPS/CTPS2/SHMT1/CAD/KDM1A/GART	12
BP	GO:0071156	regulation of cell cycle arrest	20/765	108/18670	1.36302e-08	2.53509e-07	2.12095e-07	CCNB1/CDK1/GTSE1/FOXM1/PCNA/AURKA/BRCA1/E2F8/CDC25C/E2F1/E2F7/CHEK2/CDK2/CDK4/ZNF268/CASP2/PRMT1/CNOT1/CNOT6/PPP2R5B	20
BP	GO:0006301	postreplication repair	14/765	52/18670	1.38902e-08	2.57103e-07	2.15102e-07	DTL/PCNA/POLE2/BRCA1/RFC4/RFC3/RFC5/RAD18/MSH2/POLH/RFC2/POLD1/POLD2/POLD3	14
BP	GO:0009411	response to UV	23/765	141/18670	1.42769e-08	2.62995e-07	2.20032e-07	PBK/DTL/BRCA2/PCNA/AURKB/CHEK1/CDC25A/FEN1/MSH6/RAD18/MSH2/POLH/POLD1/USP1/ZRANB3/TIPIN/PARP1/NPM1/KDM1A/HMGN1/ERCC8/POLD3/RUVBL2	23
BP	GO:0019083	viral transcription	26/765	177/18670	1.58328e-08	2.90268e-07	2.42849e-07	NUP107/NUP188/RRP1B/NUP205/NUP155/NUP37/DHX9/NUP35/NUP62/NUP88/POLR2D/RPS15A/RPL6/RPS7/NUP50/NUP160/NUP210/RPLP0/NUP93/SMARCA4/RPL4/RPL18A/AAAS/RPS21/RPS24/RPS6	26
BP	GO:0006289	nucleotide-excision repair	20/765	109/18670	1.60611e-08	2.93059e-07	2.45184e-07	NEIL3/BRIP1/BRCA2/PCNA/RFC4/POLE/RFC3/RFC5/LIG1/FANCC/RBBP8/RFC2/POLD1/POLD2/POLR2D/PARP1/HMGN1/LIG3/ERCC8/POLD3	20
BP	GO:0032465	regulation of cytokinesis	18/765	89/18670	1.71111e-08	3.10744e-07	2.5998e-07	KIF20A/KIF14/KIF23/ECT2/RACGAP1/PLK1/BRCA2/PRC1/AURKA/AURKB/CDC6/E2F8/KIF20B/E2F7/INCENP/CENPV/CIT/NUP62	18
BP	GO:0006401	RNA catabolic process	42/765	397/18670	1.93829e-08	3.50348e-07	2.93114e-07	RNASEH2A/E2F1/FEN1/DNA2/IGF2BP3/EXOSC2/LIN28B/HNRNPA0/DHX9/SET/LSM5/POP1/SYNCRIP/ELAVL1/EXOSC8/DKC1/HNRNPD/XRN2/HNRNPR/EXOSC9/CNOT1/MAGOHB/POLR2D/RPS15A/XPO1/RPL6/RPS7/ANP32A/NPM1/RPLP0/CNOT6/RPL4/EDC3/RPL18A/APEX1/RBM10/RPS21/RPS24/RPS6/HNRNPU/RNASEH2B/SERBP1	42
BP	GO:0046112	nucleobase biosynthetic process	9/765	19/18670	1.98377e-08	3.56893e-07	2.9859e-07	PAICS/MTHFD1/UMPS/PPAT/GMPS/CTPS2/SHMT1/CAD/GART	9
BP	GO:0061640	cytoskeleton-dependent cytokinesis	19/765	100/18670	2.02366e-08	3.62376e-07	3.03177e-07	KIF20A/KIF23/ANLN/KIF4A/NUSAP1/ECT2/RACGAP1/CEP55/PLK1/BRCA2/ESPL1/AURKB/CENPA/CKAP2/KIF20B/INCENP/CDT1/CIT/NUP62	19
BP	GO:0006298	mismatch repair	12/765	38/18670	2.08447e-08	3.71538e-07	3.10843e-07	EXO1/PCNA/RNASEH2A/LIG1/MSH6/MSH2/POLD1/TDG/POLD2/MSH5/HMGB1/POLD3	12
BP	GO:0000079	regulation of cyclin-dependent protein serine/threonine kinase activity	19/765	102/18670	2.83596e-08	5.03154e-07	4.20957e-07	CCNB2/CCNA2/CCNB1/BLM/PLK1/CDC6/CDKN3/CDC25C/CDC25A/CKS1B/CKS2/CCNF/CCNE2/PKMYT1/CCNJ/IPO5/CDK4/PSRC1/DIRAS3	19
BP	GO:0071158	positive regulation of cell cycle arrest	17/765	82/18670	2.88963e-08	5.09696e-07	4.26431e-07	CCNB1/CDK1/GTSE1/PCNA/AURKA/BRCA1/E2F8/CDC25C/E2F1/E2F7/CHEK2/CDK2/CASP2/PRMT1/CNOT1/CNOT6/PPP2R5B	17
BP	GO:0042769	DNA damage response, detection of DNA damage	12/765	39/18670	2.89931e-08	5.09696e-07	4.26431e-07	DTL/PCNA/RFC4/RFC3/RFC5/RAD18/RFC2/POLD1/POLD2/USP1/PARP1/POLD3	12
BP	GO:1901976	regulation of cell cycle checkpoint	11/765	32/18670	2.98421e-08	5.22237e-07	4.36923e-07	NDC80/CCNB1/MAD2L1/WDR76/RFWD3/GEN1/CHEK2/CDK5RAP2/CDT1/XRCC3/RNASEH2B	11
BP	GO:2000134	negative regulation of G1/S transition of mitotic cell cycle	21/765	125/18670	3.55857e-08	6.19694e-07	5.18459e-07	CCNB1/CDK1/GTSE1/PCNA/AURKA/E2F8/CDC25C/E2F1/EZH2/E2F7/RFWD3/RBL1/WEE1/CHEK2/CDK2/PRKDC/CDK4/CASP2/PRMT1/CNOT1/CNOT6	21
BP	GO:2000045	regulation of G1/S transition of mitotic cell cycle	26/765	184/18670	3.5733e-08	6.19694e-07	5.18459e-07	KIF14/CCNB1/CDK1/GTSE1/CDC45/PCNA/AURKA/CDC6/E2F8/CDC25C/E2F1/EZH2/E2F7/RFWD3/RBL1/WEE1/CHEK2/CDK2/PRKDC/MTBP/CDK4/CASP2/PRMT1/CNOT1/CNOT6/APEX1	26
BP	GO:0050684	regulation of mRNA processing	22/765	137/18670	3.93343e-08	6.7909e-07	5.68152e-07	CCNB1/SNRPA/SRPK1/RBMX/RBM15/HNRNPA1/DHX9/SRSF2/HNRNPL/BARD1/PTBP1/U2AF2/SRSF1/DAZAP1/SRSF3/CPSF6/RBM10/SRSF6/RBM15B/SRSF9/HNRNPU/SRSF7	22
BP	GO:0060249	anatomical structure homeostasis	44/765	439/18670	4.42204e-08	7.60037e-07	6.35876e-07	EXO1/BLM/BRCA2/RAD51/PCNA/POLE2/AURKB/RFC4/POLE/POLA2/RFC3/PRIM1/RFC5/NEK2/FEN1/DNA2/POLA1/PRIM2/DCLRE1B/CCNE2/PRKDC/RFC2/POLD1/XRCC3/POLD2/HNRNPA1/WRAP53/BARD1/DKC1/HNRNPD/XRCC5/ZNF675/RECQL4/PARP1/CCT7/CCT2/CCT5/RAD51C/APEX1/POLD3/CCT3/HNRNPU/NCDN/MAP1A	44
BP	GO:1904029	regulation of cyclin-dependent protein kinase activity	19/765	106/18670	5.4254e-08	9.28347e-07	7.76689e-07	CCNB2/CCNA2/CCNB1/BLM/PLK1/CDC6/CDKN3/CDC25C/CDC25A/CKS1B/CKS2/CCNF/CCNE2/PKMYT1/CCNJ/IPO5/CDK4/PSRC1/DIRAS3	19
BP	GO:0010971	positive regulation of G2/M transition of mitotic cell cycle	10/765	27/18670	5.63193e-08	9.59421e-07	8.02688e-07	CCNB1/CDK1/DTL/FBXO5/CDC25C/CDC25A/CDC7/CDK4/RCC2/RAD51C	10
BP	GO:0016569	covalent chromatin modification	46/765	474/18670	5.7608e-08	9.77051e-07	8.17437e-07	CCNA2/CCNB1/CDK1/BRCA2/AURKA/AURKB/BRCA1/UHRF1/CHEK1/HELLS/SUV39H2/EZH2/VRK1/MYB/DNMT1/CDK2/TAF5/ACTL6A/TRIM28/CTCF/HDAC2/USP3/SET/RUVBL1/PHF19/BAZ1A/USP49/BEND3/PRMT1/TET1/DOT1L/SUV39H1/EHMT2/SAP30/SUZ12/MTA1/YEATS4/KDM1A/BCOR/FBL/SMARCAD1/PAXIP1/RUVBL2/DNMT3A/NAP1L2/HDAC11	46
BP	GO:0000380	alternative mRNA splicing, via spliceosome	16/765	76/18670	5.86458e-08	9.9029e-07	8.28514e-07	RBMX/RBM15/HNRNPA1/DHX9/SRSF2/HNRNPL/PTBP1/SRSF1/SRSF3/KDM1A/RBM10/SRSF6/RBM15B/SRSF9/HNRNPU/SRSF7	16
BP	GO:2000779	regulation of double-strand break repair	16/765	77/18670	7.12482e-08	1.19784e-06	1.00216e-06	FOXM1/RAD51/RAD51AP1/POLQ/TIMELESS/CHEK1/FANCB/DEK/FIGNL1/PRKDC/DDX11/TEX15/WRAP53/PARP1/KDM1A/FUS	16
BP	GO:0072698	protein localization to microtubule cytoskeleton	13/765	50/18670	7.22636e-08	1.20963e-06	1.01202e-06	TTK/FAM83D/AURKA/SPAG5/STIL/KIF20B/CEP72/CCDC14/NUP62/NEDD1/CEP192/HNRNPU/MAP1A	13
BP	GO:0006284	base-excision repair	12/765	42/18670	7.32023e-08	1.22004e-06	1.02073e-06	NEIL3/POLQ/PCNA/POLE/FEN1/DNA2/LIG1/UNG/POLD1/TDG/APEX1/LIG3	12
BP	GO:1902807	negative regulation of cell cycle G1/S phase transition	21/765	131/18670	8.23567e-08	1.3667e-06	1.14343e-06	CCNB1/CDK1/GTSE1/PCNA/AURKA/E2F8/CDC25C/E2F1/EZH2/E2F7/RFWD3/RBL1/WEE1/CHEK2/CDK2/PRKDC/CDK4/CASP2/PRMT1/CNOT1/CNOT6	21
BP	GO:0051984	positive regulation of chromosome segregation	10/765	28/18670	8.44009e-08	1.39461e-06	1.16678e-06	DLGAP5/CCNB1/ESPL1/CDC6/FEN1/RAD18/CDT1/DDX11/RCC2/HNRNPU	10
BP	GO:0000731	DNA synthesis involved in DNA repair	13/765	51/18670	9.33779e-08	1.53635e-06	1.28536e-06	DTL/PCNA/POLE2/RFC4/POLE/RFC3/RFC5/POLA1/POLH/RFC2/POLD1/POLD2/POLD3	13
BP	GO:0046599	regulation of centriole replication	9/765	22/18670	9.55961e-08	1.56615e-06	1.3103e-06	PLK4/BRCA1/STIL/CENPJ/CDK5RAP2/NUP62/NPM1/ALMS1/CEP76	9
BP	GO:0051302	regulation of cell division	24/765	168/18670	9.66902e-08	1.57736e-06	1.31968e-06	KIF20A/ASPM/KIF14/KIF23/ECT2/RACGAP1/BLM/PLK1/BRCA2/PRC1/AURKA/AURKB/CDC6/E2F8/ORC6/KIF20B/E2F7/KIF18B/RBL1/INCENP/CENPV/CIT/NUP62/NAP1L2	24
BP	GO:0045740	positive regulation of DNA replication	11/765	36/18670	1.19584e-07	1.94262e-06	1.62527e-06	CDK1/PCNA/E2F8/DBF4/E2F7/ATAD5/DNA2/CDK2/CDC7/CDT1/DHX9	11
BP	GO:0051988	regulation of attachment of spindle microtubules to kinetochore	7/765	12/18670	1.2485e-07	2.01964e-06	1.6897e-06	CCNB1/ECT2/RACGAP1/SPAG5/NEK2/RCC2/HNRNPU	7
BP	GO:0009124	nucleoside monophosphate biosynthetic process	12/765	44/18670	1.29468e-07	2.08557e-06	1.74486e-06	TYMS/TK1/PAICS/UMPS/PPAT/DUT/GMPS/PFAS/SHMT1/CAD/GART/UPP1	12
BP	GO:0007076	mitotic chromosome condensation	8/765	17/18670	1.34072e-07	2.14182e-06	1.79192e-06	NCAPH/NCAPG/NUSAP1/NCAPD2/SMC4/CDCA5/SMC2/NCAPD3	8
BP	GO:0034501	protein localization to kinetochore	8/765	17/18670	1.34072e-07	2.14182e-06	1.79192e-06	TTK/NDC80/CDK1/AURKB/CDT1/MTBP/CENPQ/RCC2	8
BP	GO:0007131	reciprocal meiotic recombination	13/765	53/18670	1.52927e-07	2.43293e-06	2.03548e-06	TOP2A/BRIP1/RAD51/TRIP13/RAD54L/EME1/MND1/RAD54B/FANCM/PSMC3IP/MSH5/RMI1/RAD51C	13
BP	GO:0010569	regulation of double-strand break repair via homologous recombination	12/765	45/18670	1.70012e-07	2.6936e-06	2.25357e-06	RAD51/RAD51AP1/POLQ/TIMELESS/CHEK1/FANCB/FIGNL1/TEX15/WRAP53/PARP1/KDM1A/FUS	12
BP	GO:0035825	homologous recombination	13/765	54/18670	1.93929e-07	3.05994e-06	2.56006e-06	TOP2A/BRIP1/RAD51/TRIP13/RAD54L/EME1/MND1/RAD54B/FANCM/PSMC3IP/MSH5/RMI1/RAD51C	13
BP	GO:0060968	regulation of gene silencing	21/765	139/18670	2.32726e-07	3.65713e-06	3.05969e-06	ATAD2/CDC45/NUP107/CDK2/NUP188/NUP205/NUP155/NUP37/DHX9/NUP35/NUP62/ELAVL1/NUP88/POLR2D/XPO5/NUP50/NUP160/NUP210/NUP93/AAAS/MYCN	21
BP	GO:0030261	chromosome condensation	12/765	47/18670	2.86443e-07	4.48294e-06	3.7506e-06	NCAPH/NCAPG/NUSAP1/CCNB1/CDK1/TOP2A/NCAPD2/SMC4/CDCA5/NCAPG2/SMC2/NCAPD3	12
BP	GO:0000381	regulation of alternative mRNA splicing, via spliceosome	14/765	65/18670	2.92039e-07	4.51546e-06	3.7778e-06	RBMX/RBM15/HNRNPA1/SRSF2/HNRNPL/PTBP1/SRSF1/SRSF3/RBM10/SRSF6/RBM15B/SRSF9/HNRNPU/SRSF7	14
BP	GO:0045739	positive regulation of DNA repair	14/765	65/18670	2.92039e-07	4.51546e-06	3.7778e-06	FOXM1/PCNA/TIMELESS/BRCA1/FANCB/TRIM28/PRKDC/DDX11/DHX9/WRAP53/PARP1/HMGB1/ERCC8/FUS	14
BP	GO:0070192	chromosome organization involved in meiotic cell cycle	14/765	65/18670	2.92039e-07	4.51546e-06	3.7778e-06	BUB1/NCAPH/BUB1B/BRIP1/RAD51/NCAPD2/SMC4/TRIP13/FANCD2/SMC2/NCAPD3/CCNE2/TEX15/RAD51C	14
BP	GO:0016570	histone modification	43/765	454/18670	3.07365e-07	4.73342e-06	3.96016e-06	CCNA2/CCNB1/CDK1/BRCA2/AURKA/AURKB/BRCA1/UHRF1/CHEK1/SUV39H2/EZH2/VRK1/MYB/DNMT1/CDK2/TAF5/ACTL6A/CTCF/HDAC2/USP3/SET/RUVBL1/PHF19/BAZ1A/USP49/BEND3/PRMT1/TET1/DOT1L/SUV39H1/EHMT2/SAP30/SUZ12/MTA1/YEATS4/KDM1A/BCOR/FBL/SMARCAD1/PAXIP1/RUVBL2/NAP1L2/HDAC11	43
BP	GO:2000278	regulation of DNA biosynthetic process	18/765	108/18670	3.78668e-07	5.80826e-06	4.8594e-06	DSCC1/AURKB/RFC4/RFC3/RFC5/NEK2/RFC2/HNRNPA1/WRAP53/DKC1/HNRNPD/XRCC5/NVL/CCT7/CCT2/CCT5/CCT3/HNRNPU	18
BP	GO:0090670	RNA localization to Cajal body	8/765	19/18670	3.87443e-07	5.84963e-06	4.89402e-06	RUVBL1/WRAP53/DKC1/CCT7/CCT2/CCT5/RUVBL2/CCT3	8
BP	GO:0090671	telomerase RNA localization to Cajal body	8/765	19/18670	3.87443e-07	5.84963e-06	4.89402e-06	RUVBL1/WRAP53/DKC1/CCT7/CCT2/CCT5/RUVBL2/CCT3	8
BP	GO:0090672	telomerase RNA localization	8/765	19/18670	3.87443e-07	5.84963e-06	4.89402e-06	RUVBL1/WRAP53/DKC1/CCT7/CCT2/CCT5/RUVBL2/CCT3	8
BP	GO:0090685	RNA localization to nucleus	8/765	19/18670	3.87443e-07	5.84963e-06	4.89402e-06	RUVBL1/WRAP53/DKC1/CCT7/CCT2/CCT5/RUVBL2/CCT3	8
BP	GO:0034504	protein localization to nucleus	30/765	262/18670	3.89675e-07	5.86035e-06	4.90298e-06	CDK1/ECT2/GTSE1/PLK1/NUP107/CSE1L/NUP188/TRIM28/IPO5/NUP155/NUP35/WRAP53/NUP62/KPNA2/BARD1/DKC1/NUP88/XPO1/NUP50/PARP1/NVL/CCT7/NUP93/PHB2/POLR1A/CCT2/CCT5/RAN/CCT3/HNRNPU	30
BP	GO:0048024	regulation of mRNA splicing, via spliceosome	17/765	98/18670	4.41389e-07	6.61225e-06	5.53205e-06	SRPK1/RBMX/RBM15/HNRNPA1/SRSF2/HNRNPL/PTBP1/U2AF2/SRSF1/DAZAP1/SRSF3/RBM10/SRSF6/RBM15B/SRSF9/HNRNPU/SRSF7	17
BP	GO:1903578	regulation of ATP metabolic process	19/765	121/18670	4.71511e-07	7.03612e-06	5.88668e-06	CCNB1/CDK1/NUP107/NUP188/NUP205/NUP155/NUP37/NUP35/NUP62/BEND3/NUP88/NUP50/NUP160/PARP1/NUP210/NUP93/AAAS/SHMT2/HTR2A	19
BP	GO:0006268	DNA unwinding involved in DNA replication	7/765	14/18670	5.03359e-07	7.36856e-06	6.16481e-06	BLM/RAD51/MCM6/MCM2/MCM4/MCM7/RECQL4	7
BP	GO:0007100	mitotic centrosome separation	7/765	14/18670	5.03359e-07	7.36856e-06	6.16481e-06	KIF11/AURKA/CHEK1/NEK2/NUP62/RANBP1/NDE1	7
BP	GO:0090231	regulation of spindle checkpoint	7/765	14/18670	5.03359e-07	7.36856e-06	6.16481e-06	NDC80/CCNB1/MAD2L1/GEN1/CDK5RAP2/CDT1/XRCC3	7
BP	GO:0090266	regulation of mitotic cell cycle spindle assembly checkpoint	7/765	14/18670	5.03359e-07	7.36856e-06	6.16481e-06	NDC80/CCNB1/MAD2L1/GEN1/CDK5RAP2/CDT1/XRCC3	7
BP	GO:1903504	regulation of mitotic spindle checkpoint	7/765	14/18670	5.03359e-07	7.36856e-06	6.16481e-06	NDC80/CCNB1/MAD2L1/GEN1/CDK5RAP2/CDT1/XRCC3	7
BP	GO:0019985	translesion synthesis	11/765	41/18670	5.21351e-07	7.60303e-06	6.36098e-06	DTL/PCNA/POLE2/RFC4/RFC3/RFC5/POLH/RFC2/POLD1/POLD2/POLD3	11
BP	GO:1900034	regulation of cellular response to heat	15/765	79/18670	6.28227e-07	9.09275e-06	7.60733e-06	NUP107/NUP188/NUP205/NUP155/NUP37/NUP35/NUP62/NUP88/NUP50/NUP160/NUP210/NUP93/AAAS/CAMK2A/CRYAB	15
BP	GO:1903312	negative regulation of mRNA metabolic process	15/765	79/18670	6.28227e-07	9.09275e-06	7.60733e-06	E2F1/RBMX/HNRNPA0/DHX9/BARD1/PTBP1/U2AF2/SYNCRIP/ELAVL1/HNRNPD/RBM10/SRSF6/SRSF9/HNRNPU/SRSF7	15
BP	GO:0032875	regulation of DNA endoreduplication	6/765	10/18670	8.46386e-07	1.20688e-05	1.00972e-05	FBXO5/E2F8/E2F7/MSH6/SMC1A/SMC3	6
BP	GO:1903405	protein localization to nuclear body	6/765	10/18670	8.46386e-07	1.20688e-05	1.00972e-05	WRAP53/DKC1/CCT7/CCT2/CCT5/CCT3	6
BP	GO:1904851	positive regulation of establishment of protein localization to telomere	6/765	10/18670	8.46386e-07	1.20688e-05	1.00972e-05	WRAP53/DKC1/CCT7/CCT2/CCT5/CCT3	6
BP	GO:1904867	protein localization to Cajal body	6/765	10/18670	8.46386e-07	1.20688e-05	1.00972e-05	WRAP53/DKC1/CCT7/CCT2/CCT5/CCT3	6
BP	GO:0051299	centrosome separation	7/765	15/18670	9.10386e-07	1.2886e-05	1.07809e-05	KIF11/AURKA/CHEK1/NEK2/NUP62/RANBP1/NDE1	7
BP	GO:1904874	positive regulation of telomerase RNA localization to Cajal body	7/765	15/18670	9.10386e-07	1.2886e-05	1.07809e-05	RUVBL1/DKC1/CCT7/CCT2/CCT5/RUVBL2/CCT3	7
BP	GO:0060147	regulation of posttranscriptional gene silencing	18/765	117/18670	1.279e-06	1.79713e-05	1.50354e-05	NUP107/NUP188/NUP205/NUP155/NUP37/DHX9/NUP35/NUP62/ELAVL1/NUP88/POLR2D/XPO5/NUP50/NUP160/NUP210/NUP93/AAAS/MYCN	18
BP	GO:0060966	regulation of gene silencing by RNA	18/765	117/18670	1.279e-06	1.79713e-05	1.50354e-05	NUP107/NUP188/NUP205/NUP155/NUP37/DHX9/NUP35/NUP62/ELAVL1/NUP88/POLR2D/XPO5/NUP50/NUP160/NUP210/NUP93/AAAS/MYCN	18
BP	GO:1904666	regulation of ubiquitin protein ligase activity	8/765	22/18670	1.46905e-06	2.05667e-05	1.72069e-05	UBE2C/PLK1/FBXO5/CDC20/MAD2L1/MASTL/UBE2S/RPS7	8
BP	GO:0009113	purine nucleobase biosynthetic process	6/765	11/18670	1.79733e-06	2.48911e-05	2.08248e-05	PAICS/MTHFD1/PPAT/GMPS/SHMT1/GART	6
BP	GO:0042023	DNA endoreduplication	6/765	11/18670	1.79733e-06	2.48911e-05	2.08248e-05	FBXO5/E2F8/E2F7/MSH6/SMC1A/SMC3	6
BP	GO:0070203	regulation of establishment of protein localization to telomere	6/765	11/18670	1.79733e-06	2.48911e-05	2.08248e-05	WRAP53/DKC1/CCT7/CCT2/CCT5/CCT3	6
BP	GO:2001022	positive regulation of response to DNA damage stimulus	16/765	97/18670	1.92437e-06	2.65549e-05	2.22168e-05	FOXM1/PCNA/TIMELESS/BRCA1/FANCB/TRIM28/PRKDC/DDX11/DHX9/WRAP53/PARP1/HMGB1/PAXIP1/ERCC8/FUS/PLA2R1	16
BP	GO:0031124	mRNA 3'-end processing	16/765	98/18670	2.21373e-06	3.04388e-05	2.54662e-05	CCNB1/SNRPA/ZNF473/SRSF2/BARD1/U2AF2/SRSF1/MAGOHB/POLR2D/CPSF3/SRSF3/CPSF6/SRSF6/THOC3/SRSF9/SRSF7	16
BP	GO:0006110	regulation of glycolytic process	14/765	77/18670	2.55014e-06	3.49396e-05	2.92318e-05	NUP107/NUP188/NUP205/NUP155/NUP37/NUP35/NUP62/NUP88/NUP50/NUP160/NUP210/NUP93/AAAS/HTR2A	14
BP	GO:0043484	regulation of RNA splicing	19/765	135/18670	2.59293e-06	3.53999e-05	2.96169e-05	SRPK1/RBMX/RRP1B/RBM15/HNRNPA1/SRSF2/HNRNPL/PTBP1/U2AF2/SRSF1/DAZAP1/SRSF3/RBM10/SRSF6/RBM15B/SRSF9/FUS/HNRNPU/SRSF7	19
BP	GO:0007143	female meiotic nuclear division	9/765	31/18670	2.7792e-06	3.78088e-05	3.16323e-05	NCAPH/TTK/TOP2A/PLK1/FBXO5/AURKA/TRIP13/MASTL/RAD51C	9
BP	GO:0051170	import into nucleus	21/765	163/18670	3.34219e-06	4.53079e-05	3.79063e-05	ECT2/NUP107/CSE1L/NUP188/TRIM28/SNRPB/IPO5/NUP155/HNRNPA1/NUP35/NUP62/KPNA2/SNRPF/NUP88/SNRPD1/NUP50/NUP93/PHB2/GEMIN4/RAN/SNRPE	21
BP	GO:0060964	regulation of gene silencing by miRNA	17/765	113/18670	3.43936e-06	4.62241e-05	3.86728e-05	NUP107/NUP188/NUP205/NUP155/NUP37/DHX9/NUP35/NUP62/ELAVL1/NUP88/POLR2D/NUP50/NUP160/NUP210/NUP93/AAAS/MYCN	17
BP	GO:0070202	regulation of establishment of protein localization to chromosome	6/765	12/18670	3.46981e-06	4.62241e-05	3.86728e-05	WRAP53/DKC1/CCT7/CCT2/CCT5/CCT3	6
BP	GO:1904816	positive regulation of protein localization to chromosome, telomeric region	6/765	12/18670	3.46981e-06	4.62241e-05	3.86728e-05	WRAP53/DKC1/CCT7/CCT2/CCT5/CCT3	6
BP	GO:1990173	protein localization to nucleoplasm	6/765	12/18670	3.46981e-06	4.62241e-05	3.86728e-05	WRAP53/DKC1/CCT7/CCT2/CCT5/CCT3	6
BP	GO:2000105	positive regulation of DNA-dependent DNA replication	6/765	12/18670	3.46981e-06	4.62241e-05	3.86728e-05	E2F8/DBF4/E2F7/CDK2/CDC7/CDT1	6
BP	GO:0032467	positive regulation of cytokinesis	10/765	40/18670	3.48805e-06	4.63069e-05	3.8742e-05	KIF14/KIF23/ECT2/RACGAP1/AURKB/CDC6/KIF20B/CENPV/CIT/NUP62	10
BP	GO:0070200	establishment of protein localization to telomere	7/765	18/18670	4.04134e-06	5.32849e-05	4.45801e-05	BRCA2/WRAP53/DKC1/CCT7/CCT2/CCT5/CCT3	7
BP	GO:1904872	regulation of telomerase RNA localization to Cajal body	7/765	18/18670	4.04134e-06	5.32849e-05	4.45801e-05	RUVBL1/DKC1/CCT7/CCT2/CCT5/RUVBL2/CCT3	7
BP	GO:0022613	ribonucleoprotein complex biogenesis	41/765	468/18670	4.20601e-06	5.52667e-05	4.62381e-05	SRPK1/RBMX/RRP1B/EXOSC2/SNRPB/SNRNP200/PA2G4/DHX9/RUVBL1/SRSF1/TEX10/EXOSC8/SNRPF/DKC1/XRN2/EXOSC9/NUP88/POLR2D/SNRPD1/SUV39H1/XPO1/RPL6/RPS7/NPM1/RPLP0/NVL/USP39/CPSF6/NOL11/GEMIN4/FBL/URB2/RAN/RPS21/RUVBL2/SNRPE/SRSF6/NOP2/RPS24/RPS6/SRSF9	41
BP	GO:0031145	anaphase-promoting complex-dependent catabolic process	14/765	81/18670	4.75651e-06	6.22877e-05	5.21122e-05	BUB1B/CCNB1/CDK1/UBE2C/PTTG1/PLK1/FBXO5/CDC20/MAD2L1/AURKA/AURKB/CDK2/UBE2S/ANAPC1	14
BP	GO:0007050	cell cycle arrest	26/765	237/18670	5.08363e-06	6.63457e-05	5.55073e-05	CCNB1/CDK1/PRR11/GTSE1/FOXM1/PCNA/AURKA/BRCA1/E2F8/CDKN3/CDC25C/KIF20B/E2F1/E2F7/CHEK2/CDK2/MSH2/MTBP/CDK4/BARD1/ZNF268/CASP2/PRMT1/CNOT1/CNOT6/PPP2R5B	26
BP	GO:0010833	telomere maintenance via telomere lengthening	14/765	82/18670	5.52251e-06	7.183e-05	6.00956e-05	RAD51/AURKB/NEK2/DCLRE1B/HNRNPA1/WRAP53/DKC1/XRCC5/PARP1/CCT7/CCT2/CCT5/CCT3/HNRNPU	14
BP	GO:0046653	tetrahydrofolate metabolic process	7/765	19/18670	6.17279e-06	7.97491e-05	6.6721e-05	TYMS/DHFR/MTHFD1/SHMT1/SHMT2/MTHFD2/GART	7
BP	GO:0048025	negative regulation of mRNA splicing, via spliceosome	7/765	19/18670	6.17279e-06	7.97491e-05	6.6721e-05	RBMX/PTBP1/U2AF2/RBM10/SRSF6/SRSF9/SRSF7	7
BP	GO:0051315	attachment of mitotic spindle microtubules to kinetochore	6/765	13/18670	6.22028e-06	8.00939e-05	6.70095e-05	NDC80/NUF2/KIF2C/CENPE/CDT1/HNRNPU	6
BP	GO:0009123	nucleoside monophosphate metabolic process	13/765	72/18670	6.28291e-06	8.06307e-05	6.74586e-05	TYMS/DTYMK/TK1/PAICS/UMPS/PPAT/DUT/GMPS/PFAS/SHMT1/CAD/GART/UPP1	13
BP	GO:0032212	positive regulation of telomere maintenance via telomerase	9/765	34/18670	6.47438e-06	8.28119e-05	6.92835e-05	AURKB/NEK2/HNRNPA1/DKC1/XRCC5/CCT7/CCT2/CCT5/CCT3	9
BP	GO:0006402	mRNA catabolic process	34/765	364/18670	7.17131e-06	9.14223e-05	7.64873e-05	E2F1/IGF2BP3/EXOSC2/HNRNPA0/DHX9/SET/LSM5/SYNCRIP/ELAVL1/EXOSC8/HNRNPD/HNRNPR/EXOSC9/CNOT1/MAGOHB/POLR2D/RPS15A/XPO1/RPL6/RPS7/ANP32A/NPM1/RPLP0/CNOT6/RPL4/EDC3/RPL18A/APEX1/RBM10/RPS21/RPS24/RPS6/HNRNPU/SERBP1	34
BP	GO:0006283	transcription-coupled nucleotide-excision repair	13/765	73/18670	7.36115e-06	9.35327e-05	7.82529e-05	PCNA/RFC4/RFC3/RFC5/LIG1/RFC2/POLD1/POLD2/POLR2D/HMGN1/LIG3/ERCC8/POLD3	13
BP	GO:0045840	positive regulation of mitotic nuclear division	11/765	53/18670	8.02872e-06	0.00010168	8.50689e-05	DLGAP5/NUSAP1/UBE2C/ESPL1/AURKA/CDCA5/CDT1/NUP62/RANBP1/PHB2/HNRNPU	11
BP	GO:0009262	deoxyribonucleotide metabolic process	9/765	35/18670	8.40061e-06	0.000106041	8.87174e-05	TYMS/RRM2/DTYMK/RRM1/UNG/TDG/DUT/SHMT1/DCTPP1	9
BP	GO:0070199	establishment of protein localization to chromosome	8/765	27/18670	8.49961e-06	0.00010694	8.94696e-05	BRCA2/WRAP53/DKC1/CCT7/CCT2/CCT5/RUVBL2/CCT3	8
BP	GO:1900182	positive regulation of protein localization to nucleus	13/765	74/18670	8.59932e-06	0.000107842	9.02243e-05	CDK1/ECT2/GTSE1/PLK1/TRIM28/IPO5/DKC1/PARP1/CCT7/CCT2/CCT5/RAN/CCT3	13
BP	GO:0009219	pyrimidine deoxyribonucleotide metabolic process	7/765	20/18670	9.16137e-06	0.000114146	9.54992e-05	TYMS/DTYMK/UNG/TDG/DUT/SHMT1/DCTPP1	7
BP	GO:0042276	error-prone translesion synthesis	7/765	20/18670	9.16137e-06	0.000114146	9.54992e-05	PCNA/POLE2/RFC4/RFC3/RFC5/POLH/RFC2	7
BP	GO:0051656	establishment of organelle localization	36/765	401/18670	9.43254e-06	0.000117146	9.80087e-05	KIF14/DLGAP5/KIF23/CENPF/NDC80/NUSAP1/CCNB1/KIF18A/NUF2/KIF2C/KIFC1/PLK1/FAM83D/CENPE/MAD2L1/ESPL1/SPAG5/CENPA/CDCA5/CDCA8/KIF22/CDK5RAP2/CDT1/CENPQ/NUP62/PSRC1/NUP88/NDE1/SYNE2/XPO1/NPM1/WASF1/RAN/HNRNPU/DYNC1I1/HAP1	36
BP	GO:1904814	regulation of protein localization to chromosome, telomeric region	6/765	14/18670	1.0508e-05	0.000130083	0.000108832	WRAP53/DKC1/CCT7/CCT2/CCT5/CCT3	6
BP	GO:0043470	regulation of carbohydrate catabolic process	14/765	87/18670	1.12417e-05	0.00013872	0.000116058	NUP107/NUP188/NUP205/NUP155/NUP37/NUP35/NUP62/NUP88/NUP50/NUP160/NUP210/NUP93/AAAS/HTR2A	14
BP	GO:0006760	folic acid-containing compound metabolic process	8/765	28/18670	1.1474e-05	0.000140685	0.000117702	TYMS/DHFR/GGH/MTHFD1/SHMT1/SHMT2/MTHFD2/GART	8
BP	GO:0050686	negative regulation of mRNA processing	8/765	28/18670	1.1474e-05	0.000140685	0.000117702	RBMX/BARD1/PTBP1/U2AF2/RBM10/SRSF6/SRSF9/SRSF7	8
BP	GO:0006144	purine nucleobase metabolic process	7/765	21/18670	1.32572e-05	0.000162033	0.000135563	PAICS/MTHFD1/PPAT/GMPS/SHMT1/KDM1A/GART	7
BP	GO:0006296	nucleotide-excision repair, DNA incision, 5'-to lesion	9/765	37/18670	1.37515e-05	0.000167013	0.000139729	PCNA/RFC4/RFC3/RFC5/RFC2/POLD1/POLD2/PARP1/POLD3	9
BP	GO:1904358	positive regulation of telomere maintenance via telomere lengthening	9/765	37/18670	1.37515e-05	0.000167013	0.000139729	AURKB/NEK2/HNRNPA1/DKC1/XRCC5/CCT7/CCT2/CCT5/CCT3	9
BP	GO:0070198	protein localization to chromosome, telomeric region	8/765	29/18670	1.52789e-05	0.00018498	0.000154761	BRCA2/WRAP53/DKC1/XRCC5/CCT7/CCT2/CCT5/CCT3	8
BP	GO:0016571	histone methylation	18/765	139/18670	1.53771e-05	0.000185586	0.000155268	BRCA1/SUV39H2/EZH2/MYB/DNMT1/CTCF/PHF19/BEND3/PRMT1/TET1/DOT1L/SUV39H1/EHMT2/SUZ12/KDM1A/BCOR/FBL/PAXIP1	18
BP	GO:0009263	deoxyribonucleotide biosynthetic process	6/765	15/18670	1.69064e-05	0.000203405	0.000170176	TYMS/RRM2/DTYMK/RRM1/DUT/SHMT1	6
BP	GO:0090501	RNA phosphodiester bond hydrolysis	19/765	154/18670	1.8117e-05	0.000217291	0.000181794	EXO1/RNASEH2A/FEN1/EXOSC2/POP1/EXOSC8/XRN2/DGCR8/EXOSC9/CNOT1/CPSF3/CNOT6/CPSF6/EDC3/APEX1/ENDOG/RPS21/ERI2/RNASEH2B	19
BP	GO:0061647	histone H3-K9 modification	10/765	48/18670	2.00039e-05	0.000239177	0.000200104	BRCA1/CHEK1/SUV39H2/MYB/DNMT1/BEND3/SUV39H1/EHMT2/KDM1A/NAP1L2	10
BP	GO:0044818	mitotic G2/M transition checkpoint	8/765	30/18670	2.00907e-05	0.000239472	0.000200351	CDK1/BLM/BRCA1/CDC6/CLSPN/ORC1/TOPBP1/DONSON	8
BP	GO:1900180	regulation of protein localization to nucleus	16/765	116/18670	2.04383e-05	0.000242863	0.000203188	CDK1/ECT2/GTSE1/PLK1/TRIM28/IPO5/NUP62/DKC1/PARP1/NVL/CCT7/POLR1A/CCT2/CCT5/RAN/CCT3	16
BP	GO:0046822	regulation of nucleocytoplasmic transport	15/765	104/18670	2.14849e-05	0.000254514	0.000212936	ECT2/GTSE1/TRIM28/IPO5/PPP1CC/ANP32B/DHX9/NUP62/BARD1/XPO1/XPO5/CPSF6/AAAS/CTDSPL2/RAN	15
BP	GO:0032506	cytokinetic process	9/765	39/18670	2.1765e-05	0.000256255	0.000214392	KIF20A/KIF23/ANLN/ECT2/RACGAP1/CEP55/AURKB/KIF20B/NUP62	9
BP	GO:0033683	nucleotide-excision repair, DNA incision	9/765	39/18670	2.1765e-05	0.000256255	0.000214392	PCNA/RFC4/RFC3/RFC5/RFC2/POLD1/POLD2/PARP1/POLD3	9
BP	GO:0043467	regulation of generation of precursor metabolites and energy	19/765	157/18670	2.38442e-05	0.000279878	0.000234157	CCNB1/CDK1/NUP107/NUP188/NUP205/PASK/NUP155/NUP37/NUP35/NUP62/NUP88/NUP50/NUP160/NUP210/NUP93/PHB2/AAAS/SHMT2/HTR2A	19
BP	GO:0035999	tetrahydrofolate interconversion	5/765	10/18670	2.41945e-05	0.000282269	0.000236157	TYMS/MTHFD1/SHMT1/SHMT2/MTHFD2	5
BP	GO:0051231	spindle elongation	5/765	10/18670	2.41945e-05	0.000282269	0.000236157	KIF23/KIF4A/RACGAP1/PRC1/AURKB	5
BP	GO:0031572	G2 DNA damage checkpoint	8/765	31/18670	2.61121e-05	0.00030011	0.000251083	CDK1/DTL/BLM/PLK1/BRCA1/CHEK1/CLSPN/DONSON	8
BP	GO:0071539	protein localization to centrosome	8/765	31/18670	2.61121e-05	0.00030011	0.000251083	AURKA/SPAG5/STIL/CEP72/CCDC14/NUP62/NEDD1/CEP192	8
BP	GO:2000781	positive regulation of double-strand break repair	8/765	31/18670	2.61121e-05	0.00030011	0.000251083	FOXM1/TIMELESS/FANCB/PRKDC/DDX11/WRAP53/PARP1/FUS	8
BP	GO:0009130	pyrimidine nucleoside monophosphate biosynthetic process	6/765	16/18670	2.61134e-05	0.00030011	0.000251083	TYMS/UMPS/DUT/SHMT1/CAD/UPP1	6
BP	GO:0051382	kinetochore assembly	6/765	16/18670	2.61134e-05	0.00030011	0.000251083	CENPF/CENPK/CENPE/CENPA/CENPH/CENPN	6
BP	GO:0044728	DNA methylation or demethylation	14/765	94/18670	2.77963e-05	0.000318499	0.000266468	BRCA1/EZH2/DNMT1/TRIM28/CTCF/TDG/BEND3/TET1/EHMT2/PARP1/PPM1D/APEX1/ALKBH2/DNMT3A	14
BP	GO:0090224	regulation of spindle organization	9/765	41/18670	3.34349e-05	0.000381971	0.000319571	TPX2/PLK1/SPAG5/TACC3/SMC1A/NUP62/PSRC1/SMC3/HNRNPU	9
BP	GO:1905508	protein localization to microtubule organizing center	8/765	32/18670	3.35739e-05	0.000382425	0.000319951	AURKA/SPAG5/STIL/CEP72/CCDC14/NUP62/NEDD1/CEP192	8
BP	GO:0032206	positive regulation of telomere maintenance	10/765	51/18670	3.49709e-05	0.000397163	0.000332281	AURKB/NEK2/HNRNPA1/DKC1/HNRNPD/XRCC5/CCT7/CCT2/CCT5/CCT3	10
BP	GO:0033119	negative regulation of RNA splicing	7/765	24/18670	3.54337e-05	0.000401235	0.000335688	RBMX/PTBP1/U2AF2/RBM10/SRSF6/SRSF9/SRSF7	7
BP	GO:0006220	pyrimidine nucleotide metabolic process	11/765	62/18670	3.82718e-05	0.000430838	0.000360455	TYMS/DTYMK/UNG/UMPS/TDG/DUT/CTPS2/SHMT1/CAD/DCTPP1/UPP1	11
BP	GO:1904356	regulation of telomere maintenance via telomere lengthening	11/765	62/18670	3.82718e-05	0.000430838	0.000360455	AURKB/NEK2/HNRNPA1/DKC1/XRCC5/PARP1/CCT7/CCT2/CCT5/CCT3/HNRNPU	11
BP	GO:0006266	DNA ligation	6/765	17/18670	3.89607e-05	0.0004352	0.000364104	TOP2A/RAD51/HMGB2/LIG1/HMGB1/LIG3	6
BP	GO:0009129	pyrimidine nucleoside monophosphate metabolic process	6/765	17/18670	3.89607e-05	0.0004352	0.000364104	TYMS/UMPS/DUT/SHMT1/CAD/UPP1	6
BP	GO:0071478	cellular response to radiation	21/765	191/18670	3.89984e-05	0.0004352	0.000364104	PBK/ECT2/BLM/RAD51/RAD51AP1/PCNA/AURKB/CHEK1/CDC25A/CHEK2/FIGNL1/POLH/INTS7/POLD1/XRCC5/PARP1/NPM1/KDM1A/POLD3/RUVBL2/CRYAB	21
BP	GO:0009156	ribonucleoside monophosphate biosynthetic process	8/765	33/18670	4.2737e-05	0.000474157	0.000396697	PAICS/UMPS/PPAT/GMPS/PFAS/CAD/GART/UPP1	8
BP	GO:0040001	establishment of mitotic spindle localization	8/765	33/18670	4.2737e-05	0.000474157	0.000396697	NDC80/NUSAP1/PLK1/MAD2L1/ESPL1/CENPA/CDK5RAP2/NDE1	8
BP	GO:0046607	positive regulation of centrosome cycle	5/765	11/18670	4.28589e-05	0.000474157	0.000396697	PLK4/POC1A/CENPJ/NUP62/RANBP1	5
BP	GO:0034605	cellular response to heat	17/765	137/18670	4.58248e-05	0.000505518	0.000422935	NUP107/NUP188/NUP205/NUP155/HDAC2/NUP37/NUP35/NUP62/NUP88/POLR2D/NUP50/NUP160/NUP210/NUP93/AAAS/CAMK2A/CRYAB	17
BP	GO:0000729	DNA double-strand break processing	7/765	25/18670	4.74815e-05	0.000520808	0.000435727	BRIP1/BLM/BRCA1/DNA2/RBBP8/BARD1/SMARCAD1	7
BP	GO:0051307	meiotic chromosome separation	7/765	25/18670	4.74815e-05	0.000520808	0.000435727	NCAPH/TTK/TOP2A/ESPL1/EME1/FANCM/RMI1	7
BP	GO:0072527	pyrimidine-containing compound metabolic process	14/765	99/18670	5.01769e-05	0.00054881	0.000459155	TYMS/DTYMK/TK1/RRM1/UNG/UMPS/TDG/DUT/TET1/CTPS2/SHMT1/CAD/DCTPP1/UPP1	14
BP	GO:0042558	pteridine-containing compound metabolic process	8/765	34/18670	5.38948e-05	0.000587804	0.000491779	TYMS/DHFR/GGH/MTHFD1/SHMT1/SHMT2/MTHFD2/GART	8
BP	GO:0051782	negative regulation of cell division	6/765	18/18670	5.64203e-05	0.000613611	0.00051337	ASPM/BLM/AURKB/E2F8/ORC6/E2F7	6
BP	GO:0032210	regulation of telomere maintenance via telomerase	10/765	54/18670	5.86176e-05	0.000635712	0.00053186	AURKB/NEK2/HNRNPA1/DKC1/XRCC5/CCT7/CCT2/CCT5/CCT3/HNRNPU	10
BP	GO:0043487	regulation of RNA stability	20/765	183/18670	6.43884e-05	0.000696335	0.00058258	E2F1/IGF2BP3/EXOSC2/HNRNPA0/DHX9/SET/SYNCRIP/ELAVL1/EXOSC8/DKC1/HNRNPD/HNRNPR/EXOSC9/XPO1/ANP32A/NPM1/APEX1/RBM10/HNRNPU/SERBP1	20
BP	GO:0051785	positive regulation of nuclear division	11/765	66/18670	6.96888e-05	0.000751546	0.000628771	DLGAP5/NUSAP1/UBE2C/ESPL1/AURKA/CDCA5/CDT1/NUP62/RANBP1/PHB2/HNRNPU	11
BP	GO:0007077	mitotic nuclear envelope disassembly	5/765	12/18670	7.09939e-05	0.000760763	0.000636483	CCNB2/CCNB1/CDK1/PLK1/VRK1	5
BP	GO:1904668	positive regulation of ubiquitin protein ligase activity	5/765	12/18670	7.09939e-05	0.000760763	0.000636483	UBE2C/PLK1/CDC20/MASTL/UBE2S	5
BP	GO:1900542	regulation of purine nucleotide metabolic process	15/765	115/18670	7.11363e-05	0.000760763	0.000636483	NUP107/NUP188/NUP205/NUP155/NUP37/NUP35/NUP62/NUP88/NUP50/NUP160/PARP1/NUP210/NUP93/AAAS/HTR2A	15
BP	GO:0006304	DNA modification	15/765	116/18670	7.86657e-05	0.000838956	0.000701901	BRCA1/EZH2/DNMT1/UNG/TRIM28/CTCF/TDG/BEND3/TET1/EHMT2/PARP1/PPM1D/APEX1/ALKBH2/DNMT3A	15
BP	GO:0006730	one-carbon metabolic process	7/765	27/18670	8.16557e-05	0.000868437	0.000726567	TYMS/DHFR/MTHFD1/SHMT1/SHMT2/AHCY/MTHFD2	7
BP	GO:0051973	positive regulation of telomerase activity	8/765	36/18670	8.35397e-05	0.000886027	0.000741283	AURKB/NEK2/WRAP53/DKC1/HNRNPD/XRCC5/NVL/CCT2	8
BP	GO:0006140	regulation of nucleotide metabolic process	15/765	117/18670	8.68824e-05	0.000918949	0.000768827	NUP107/NUP188/NUP205/NUP155/NUP37/NUP35/NUP62/NUP88/NUP50/NUP160/PARP1/NUP210/NUP93/AAAS/HTR2A	15
BP	GO:0034404	nucleobase-containing small molecule biosynthetic process	14/765	105/18670	9.66019e-05	0.00101895	0.000852493	DTYMK/TK1/UNG/UMPS/TDG/DUT/PRTFDC1/GMPS/CAD/DCTPP1/PDE7A/NUDT5/PDE7B/UPP1	14
BP	GO:0051567	histone H3-K9 methylation	8/765	37/18670	0.000102792	0.00107833	0.000902173	BRCA1/SUV39H2/MYB/DNMT1/BEND3/SUV39H1/EHMT2/KDM1A	8
BP	GO:0060236	regulation of mitotic spindle organization	8/765	37/18670	0.000102792	0.00107833	0.000902173	TPX2/PLK1/TACC3/SMC1A/NUP62/PSRC1/SMC3/HNRNPU	8
BP	GO:0071168	protein localization to chromatin	7/765	28/18670	0.00010505	0.00109902	0.000919484	ESCO2/PLK1/CDCA5/MCM8/EZH2/MSH2/RUVBL2	7
BP	GO:0032204	regulation of telomere maintenance	12/765	81/18670	0.000108197	0.00112889	0.000944471	AURKB/NEK2/HNRNPA1/DKC1/HNRNPD/XRCC5/PARP1/CCT7/CCT2/CCT5/CCT3/HNRNPU	12
BP	GO:0070987	error-free translesion synthesis	6/765	20/18670	0.000109804	0.00114256	0.000955908	PCNA/RFC4/RFC3/RFC5/POLH/RFC2	6
BP	GO:0034401	chromatin organization involved in regulation of transcription	16/765	133/18670	0.000110378	0.00114543	0.000958313	ATAD2/CDC45/CHEK1/HELLS/EZH2/DNMT1/CENPV/TRIM28/BEND3/TET1/DOT1L/SUV39H1/HMGB1/PPM1D/SMARCD1/DNMT3A	16
BP	GO:0007004	telomere maintenance via telomerase	11/765	70/18670	0.000120997	0.00125226	0.00104768	AURKB/NEK2/HNRNPA1/WRAP53/DKC1/XRCC5/CCT7/CCT2/CCT5/CCT3/HNRNPU	11
BP	GO:0034644	cellular response to UV	12/765	82/18670	0.000122097	0.00126025	0.00105438	PBK/PCNA/AURKB/CHEK1/CDC25A/POLH/POLD1/PARP1/NPM1/KDM1A/POLD3/RUVBL2	12
BP	GO:0043488	regulation of mRNA stability	19/765	177/18670	0.00012366	0.00127142	0.00106372	E2F1/IGF2BP3/EXOSC2/HNRNPA0/DHX9/SET/SYNCRIP/ELAVL1/EXOSC8/HNRNPD/HNRNPR/EXOSC9/XPO1/ANP32A/NPM1/APEX1/RBM10/HNRNPU/SERBP1	19
BP	GO:0051653	spindle localization	9/765	48/18670	0.00012384	0.00127142	0.00106372	ASPM/NDC80/NUSAP1/PLK1/MAD2L1/ESPL1/CENPA/CDK5RAP2/NDE1	9
BP	GO:0016572	histone phosphorylation	8/765	38/18670	0.000125571	0.00128577	0.00107572	CCNA2/CCNB1/CDK1/AURKA/AURKB/CHEK1/VRK1/CDK2	8
BP	GO:0006479	protein methylation	19/765	179/18670	0.000143484	0.00146141	0.00122267	BRCA1/SUV39H2/EZH2/MYB/DNMT1/CTCF/SNRPB/PHF19/BEND3/PRMT1/TET1/DOT1L/SUV39H1/EHMT2/SUZ12/KDM1A/BCOR/FBL/PAXIP1	19
BP	GO:0008213	protein alkylation	19/765	179/18670	0.000143484	0.00146141	0.00122267	BRCA1/SUV39H2/EZH2/MYB/DNMT1/CTCF/SNRPB/PHF19/BEND3/PRMT1/TET1/DOT1L/SUV39H1/EHMT2/SUZ12/KDM1A/BCOR/FBL/PAXIP1	19
BP	GO:1902115	regulation of organelle assembly	20/765	194/18670	0.00014466	0.0014695	0.00122944	PLK4/PLK1/BRCA1/SPAG5/STIL/CENPJ/CEP135/CDK5RAP2/SMC1A/G3BP1/NUP62/SMC3/CNOT1/SYNE2/NPM1/CNOT6/ALMS1/CEP76/HNRNPU/HAP1	20
BP	GO:0045911	positive regulation of DNA recombination	8/765	39/18670	0.00015236	0.00154364	0.00129147	TIMELESS/FANCB/ATAD5/MSH2/WRAP53/PARP1/PAXIP1/FUS	8
BP	GO:0010457	centriole-centriole cohesion	5/765	14/18670	0.000167572	0.00168888	0.00141298	NEK2/CEP135/RTTN/SYNE2/CNTLN	5
BP	GO:0046606	negative regulation of centrosome cycle	5/765	14/18670	0.000167572	0.00168888	0.00141298	BRCA1/NEK2/CCNF/CDK5RAP2/NPM1	5
BP	GO:0014009	glial cell proliferation	9/765	50/18670	0.000171955	0.00172402	0.00144238	E2F1/MYB/IDH2/PPP1CC/ADCYAP1/CLU/IL34/SOX10/LGI4	9
BP	GO:0043489	RNA stabilization	9/765	50/18670	0.000171955	0.00172402	0.00144238	E2F1/HNRNPA0/DHX9/SYNCRIP/ELAVL1/DKC1/HNRNPD/RBM10/HNRNPU	9
BP	GO:0043414	macromolecule methylation	27/765	309/18670	0.000187565	0.00187565	0.00156924	BRCA1/SUV39H2/EZH2/MYB/DNMT1/TRIM28/CTCF/SNRPB/RBM15/PHF19/BEND3/PRMT1/TET1/DOT1L/SUV39H1/EHMT2/SUZ12/PARP1/KDM1A/PPM1D/BCOR/FBL/PAXIP1/WDR4/RBM15B/NOP2/DNMT3A	27
BP	GO:0002562	somatic diversification of immune receptors via germline recombination within a single locus	10/765	62/18670	0.000196035	0.00195021	0.00163162	EXO1/HMGB2/ATAD5/MSH6/MSH2/UNG/PRKDC/HMGB1/PAXIP1/TCF3	10
BP	GO:0016444	somatic cell DNA recombination	10/765	62/18670	0.000196035	0.00195021	0.00163162	EXO1/HMGB2/ATAD5/MSH6/MSH2/UNG/PRKDC/HMGB1/PAXIP1/TCF3	10
BP	GO:0006312	mitotic recombination	6/765	22/18670	0.000197048	0.00195021	0.00163162	BRCA2/RAD51/RAD54B/GEN1/XRCC3/RAD51C	6
BP	GO:0007063	regulation of sister chromatid cohesion	6/765	22/18670	0.000197048	0.00195021	0.00163162	BUB1/ESPL1/CDCA5/FEN1/CTCF/DDX11	6
BP	GO:0048146	positive regulation of fibroblast proliferation	9/765	51/18670	0.000201308	0.00198727	0.00166263	CCNA2/CCNB1/CDC6/E2F1/MYB/PRKDC/CDK4/DHX9/RNASEH2B	9
BP	GO:0061013	regulation of mRNA catabolic process	20/765	199/18670	0.000204056	0.00200925	0.00168101	E2F1/IGF2BP3/EXOSC2/HNRNPA0/DHX9/SET/SYNCRIP/ELAVL1/EXOSC8/HNRNPD/HNRNPR/EXOSC9/CNOT1/XPO1/ANP32A/NPM1/APEX1/RBM10/HNRNPU/SERBP1	20
BP	GO:0009394	2'-deoxyribonucleotide metabolic process	7/765	31/18670	0.000209595	0.00205328	0.00171785	TYMS/DTYMK/UNG/TDG/DUT/SHMT1/DCTPP1	7
BP	GO:0010165	response to X-ray	7/765	31/18670	0.000209595	0.00205328	0.00171785	BLM/BRCA2/XRCC2/MSH2/XRCC5/ERCC8/IKBIP	7
BP	GO:0006096	glycolytic process	14/765	113/18670	0.000213608	0.00208438	0.00174387	NUP107/NUP188/NUP205/NUP155/NUP37/NUP35/NUP62/NUP88/NUP50/NUP160/NUP210/NUP93/AAAS/HTR2A	14
BP	GO:0048511	rhythmic process	26/765	295/18670	0.000213852	0.00208438	0.00174387	CDK1/DTL/TOP2A/TYMS/PCNA/TIMELESS/SUV39H2/EZH2/PRKDC/CDK4/NONO/PPP1CC/HDAC2/DHX9/NFYA/CBX3/CASP2/HNRNPD/HNRNPR/SUV39H1/MTA1/ADNP/AHCY/HNRNPU/BHLHE41/KCNA2	26
BP	GO:1902275	regulation of chromatin organization	19/765	185/18670	0.000220702	0.00214571	0.00179518	MKI67/CCNB1/ATAD2/CDC45/BRCA1/CHEK1/MYB/DNMT1/TRIM28/CTCF/SET/PHF19/TET1/KDM1A/BCOR/PAXIP1/RUVBL2/HNRNPU/NAP1L2	19
BP	GO:0002200	somatic diversification of immune receptors	11/765	75/18670	0.000227504	0.00220073	0.00184121	EXO1/POLQ/HMGB2/ATAD5/MSH6/MSH2/UNG/PRKDC/HMGB1/PAXIP1/TCF3	11
BP	GO:0006353	DNA-templated transcription, termination	11/765	75/18670	0.000227504	0.00220073	0.00184121	TTF2/SNRPB/ZNF473/DHX9/SNRPF/XRN2/CPSF3/POLR1A/POLR1E/MAZ/SNRPE	11
BP	GO:0006757	ATP generation from ADP	14/765	114/18670	0.000234519	0.00225724	0.00188849	NUP107/NUP188/NUP205/NUP155/NUP37/NUP35/NUP62/NUP88/NUP50/NUP160/NUP210/NUP93/AAAS/HTR2A	14
BP	GO:0034968	histone lysine methylation	14/765	114/18670	0.000234519	0.00225724	0.00188849	BRCA1/SUV39H2/EZH2/MYB/DNMT1/PHF19/BEND3/DOT1L/SUV39H1/EHMT2/SUZ12/KDM1A/BCOR/PAXIP1	14
BP	GO:0001325	formation of extrachromosomal circular DNA	5/765	15/18670	0.000242904	0.00231728	0.00193873	EXO1/BLM/DNA2/XRCC3/XRCC5	5
BP	GO:0090656	t-circle formation	5/765	15/18670	0.000242904	0.00231728	0.00193873	EXO1/BLM/DNA2/XRCC3/XRCC5	5
BP	GO:0090737	telomere maintenance via telomere trimming	5/765	15/18670	0.000242904	0.00231728	0.00193873	EXO1/BLM/DNA2/XRCC3/XRCC5	5
BP	GO:0009416	response to light stimulus	27/765	314/18670	0.000243164	0.00231728	0.00193873	PBK/DTL/BRCA2/PCNA/AURKB/CHEK1/CDC25A/FEN1/MSH6/RAD18/MSH2/POLH/POLD1/PPP1CC/USP1/ZRANB3/TIPIN/MTA1/PARP1/NPM1/KDM1A/HMGN1/ERCC8/POLD3/RUVBL2/NDRG4/ATP1A2	27
BP	GO:0046785	microtubule polymerization	11/765	76/18670	0.000256322	0.00243664	0.00203859	FBXO5/CENPJ/CDK5RAP2/PSRC1/NDE1/CEP192/MZT1/TUBGCP4/CKAP5/TPPP3/EML2	11
BP	GO:0009147	pyrimidine nucleoside triphosphate metabolic process	6/765	23/18670	0.000257412	0.00244098	0.00204221	TYMS/DTYMK/DUT/CTPS2/CAD/DCTPP1	6
BP	GO:0060271	cilium assembly	30/765	366/18670	0.000259284	0.00245269	0.00205201	CDK1/PLK4/PLK1/KIF24/HAUS8/NEK2/POC1A/CEP152/CENPJ/CEP72/HAUS6/CEP135/CEP78/CDK5RAP2/HAUS1/SCLT1/NDE1/NEDD1/SYNE2/HAUS3/CEP192/HAUS5/ALMS1/HAUS7/CEP76/FAM161A/CKAP5/ABLIM3/EHD3/HAP1	30
BP	GO:0044782	cilium organization	31/765	384/18670	0.000269094	0.00253925	0.00212443	CDK1/PLK4/PLK1/KIF24/HAUS8/NEK2/POC1A/CEP152/CENPJ/CEP72/HAUS6/CEP135/CEP78/CDK5RAP2/RTTN/HAUS1/SCLT1/NDE1/NEDD1/SYNE2/HAUS3/CEP192/HAUS5/ALMS1/HAUS7/CEP76/FAM161A/CKAP5/ABLIM3/EHD3/HAP1	31
BP	GO:0006278	RNA-dependent DNA biosynthetic process	11/765	77/18670	0.000288161	0.0027059	0.00226386	AURKB/NEK2/HNRNPA1/WRAP53/DKC1/XRCC5/CCT7/CCT2/CCT5/CCT3/HNRNPU	11
BP	GO:0090502	RNA phosphodiester bond hydrolysis, endonucleolytic	11/765	77/18670	0.000288161	0.0027059	0.00226386	EXO1/RNASEH2A/FEN1/POP1/DGCR8/CPSF3/EDC3/APEX1/ENDOG/RPS21/RNASEH2B	11
BP	GO:0051293	establishment of spindle localization	8/765	43/18670	0.000310753	0.00291095	0.00243541	NDC80/NUSAP1/PLK1/MAD2L1/ESPL1/CENPA/CDK5RAP2/NDE1	8
BP	GO:0019692	deoxyribose phosphate metabolic process	7/765	33/18670	0.000317073	0.00296294	0.00247891	TYMS/DTYMK/UNG/TDG/DUT/SHMT1/DCTPP1	7
BP	GO:0006165	nucleoside diphosphate phosphorylation	15/765	132/18670	0.000336236	0.00313277	0.00262099	DTYMK/NUP107/NUP188/NUP205/NUP155/NUP37/NUP35/NUP62/NUP88/NUP50/NUP160/NUP210/NUP93/AAAS/HTR2A	15
BP	GO:0009408	response to heat	18/765	176/18670	0.000336875	0.00313277	0.00262099	NUP107/NUP188/NUP205/NUP155/HDAC2/NUP37/NUP35/NUP62/NUP88/POLR2D/NUP50/NUP160/NUP210/NUP93/AAAS/CAMK2A/TRPV2/CRYAB	18
BP	GO:0006206	pyrimidine nucleobase metabolic process	5/765	16/18670	0.000341445	0.00314489	0.00263113	TYMS/RRM1/UMPS/CTPS2/CAD	5
BP	GO:0030397	membrane disassembly	5/765	16/18670	0.000341445	0.00314489	0.00263113	CCNB2/CCNB1/CDK1/PLK1/VRK1	5
BP	GO:0046134	pyrimidine nucleoside biosynthetic process	5/765	16/18670	0.000341445	0.00314489	0.00263113	DTYMK/TK1/UMPS/CAD/UPP1	5
BP	GO:0051081	nuclear envelope disassembly	5/765	16/18670	0.000341445	0.00314489	0.00263113	CCNB2/CCNB1/CDK1/PLK1/VRK1	5
BP	GO:1902750	negative regulation of cell cycle G2/M phase transition	13/765	105/18670	0.000357841	0.00328804	0.00275089	CDK1/DTL/BLM/PLK1/AURKA/AURKB/BRCA1/CDC6/CHEK1/CLSPN/ORC1/TOPBP1/DONSON	13
BP	GO:0046939	nucleotide phosphorylation	15/765	134/18670	0.000395737	0.00362759	0.00303498	DTYMK/NUP107/NUP188/NUP205/NUP155/NUP37/NUP35/NUP62/NUP88/NUP50/NUP160/NUP210/NUP93/AAAS/HTR2A	15
BP	GO:1903829	positive regulation of cellular protein localization	27/765	324/18670	0.000399827	0.00365638	0.00305906	NDC80/CDK1/ECT2/GTSE1/PLK1/KIF20B/E2F1/CDT1/TRIM28/IPO5/CENPQ/ANP32B/SAE1/WRAP53/NUP62/DKC1/PARP1/CCT7/CCT2/CCT5/CTDSPL2/RAN/CCT3/ABLIM3/MICALL2/MAP1A/ITGA3	27
BP	GO:0010332	response to gamma radiation	9/765	56/18670	0.000417676	0.00380154	0.00318051	BRCA2/XRCC2/FANCD2/CHEK2/PRKDC/XRCC5/PARP1/KDM1A/CRYAB	9
BP	GO:0072528	pyrimidine-containing compound biosynthetic process	9/765	56/18670	0.000417676	0.00380154	0.00318051	TYMS/DTYMK/TK1/UMPS/DUT/CTPS2/SHMT1/CAD/UPP1	9
BP	GO:0048255	mRNA stabilization	8/765	45/18670	0.00042976	0.0039023	0.00326481	E2F1/HNRNPA0/DHX9/SYNCRIP/ELAVL1/HNRNPD/RBM10/HNRNPU	8
BP	GO:0006090	pyruvate metabolic process	16/765	150/18670	0.000443579	0.0040183	0.00336186	NUP107/NUP188/NUP205/NUP155/NUP37/NUP35/NUP62/NUP88/SLC16A1/LDHB/NUP50/NUP160/NUP210/NUP93/AAAS/HTR2A	16
BP	GO:0000726	non-recombinational repair	12/765	94/18670	0.000449871	0.00406574	0.00340155	POLQ/BRCA1/POLA1/DCLRE1B/RBBP8/PRKDC/WRAP53/BARD1/XRCC5/NHEJ1/PAXIP1/LIG3	12
BP	GO:0009185	ribonucleoside diphosphate metabolic process	15/765	136/18670	0.000464048	0.00418091	0.00349791	NUP107/NUP188/NUP205/NUP155/NUP37/NUP35/NUP62/NUP88/NUP50/NUP160/NUP210/NUP93/AAAS/NUDT5/HTR2A	15
BP	GO:0006369	termination of RNA polymerase II transcription	7/765	35/18670	0.000464787	0.00418091	0.00349791	TTF2/SNRPB/ZNF473/SNRPF/CPSF3/MAZ/SNRPE	7
BP	GO:0033262	regulation of nuclear cell cycle DNA replication	5/765	17/18670	0.000467481	0.00419534	0.00350998	DBF4/CHEK2/CDC7/CDT1/TIPIN	5
BP	GO:0046031	ADP metabolic process	14/765	122/18670	0.000474858	0.00423545	0.00354353	NUP107/NUP188/NUP205/NUP155/NUP37/NUP35/NUP62/NUP88/NUP50/NUP160/NUP210/NUP93/AAAS/HTR2A	14
BP	GO:0097549	chromatin organization involved in negative regulation of transcription	14/765	122/18670	0.000474858	0.00423545	0.00354353	ATAD2/CDC45/HELLS/EZH2/DNMT1/CENPV/TRIM28/BEND3/TET1/DOT1L/SUV39H1/HMGB1/PPM1D/DNMT3A	14
BP	GO:0006188	IMP biosynthetic process	4/765	10/18670	0.000481851	0.00423545	0.00354353	PAICS/PPAT/PFAS/GART	4
BP	GO:0007135	meiosis II	4/765	10/18670	0.000481851	0.00423545	0.00354353	BUB1/BUB1B/MASTL/RAD51C	4
BP	GO:0009157	deoxyribonucleoside monophosphate biosynthetic process	4/765	10/18670	0.000481851	0.00423545	0.00354353	TYMS/TK1/DUT/SHMT1	4
BP	GO:0032070	regulation of deoxyribonuclease activity	4/765	10/18670	0.000481851	0.00423545	0.00354353	PCNA/DDX11/HMGB1/NPM1	4
BP	GO:0033314	mitotic DNA replication checkpoint	4/765	10/18670	0.000481851	0.00423545	0.00354353	CDC6/CLSPN/ORC1/TOPBP1	4
BP	GO:0051255	spindle midzone assembly	4/765	10/18670	0.000481851	0.00423545	0.00354353	KIF23/KIF4A/RACGAP1/AURKB	4
BP	GO:0061983	meiosis II cell cycle process	4/765	10/18670	0.000481851	0.00423545	0.00354353	BUB1/BUB1B/MASTL/RAD51C	4
BP	GO:0006221	pyrimidine nucleotide biosynthetic process	8/765	46/18670	0.000501808	0.00440082	0.00368189	TYMS/DTYMK/UMPS/DUT/CTPS2/SHMT1/CAD/UPP1	8
BP	GO:0007020	microtubule nucleation	6/765	26/18670	0.000528578	0.00462506	0.00386949	CENPJ/NDE1/CEP192/MZT1/TUBGCP4/EML2	6
BP	GO:0042254	ribosome biogenesis	25/765	297/18670	0.000557731	0.00486908	0.00407365	RRP1B/EXOSC2/PA2G4/TEX10/EXOSC8/DKC1/XRN2/EXOSC9/NUP88/SUV39H1/XPO1/RPL6/RPS7/NPM1/RPLP0/NVL/NOL11/GEMIN4/FBL/URB2/RAN/RPS21/NOP2/RPS24/RPS6	25
BP	GO:0014013	regulation of gliogenesis	14/765	124/18670	0.000560348	0.00488086	0.00408351	CDK1/E2F1/EZH2/MYB/IDH2/PPP1CC/HDAC2/TIAM1/DAB1/ADCYAP1/ASPA/PTPRZ1/IL34/SOX10	14
BP	GO:0032259	methylation	29/765	366/18670	0.0005669	0.00492678	0.00412193	TYMS/BRCA1/SUV39H2/EZH2/MYB/DNMT1/TRIM28/CTCF/SNRPB/RBM15/PHF19/BEND3/PRMT1/TET1/DOT1L/SUV39H1/EHMT2/SUZ12/PARP1/KDM1A/PPM1D/BCOR/FBL/PAXIP1/WDR4/RBM15B/NOP2/AHCY/DNMT3A	29
BP	GO:0009132	nucleoside diphosphate metabolic process	16/765	154/18670	0.000594093	0.00515148	0.00430992	DTYMK/NUP107/NUP188/NUP205/NUP155/NUP37/NUP35/NUP62/NUP88/NUP50/NUP160/NUP210/NUP93/AAAS/NUDT5/HTR2A	16
BP	GO:0071479	cellular response to ionizing radiation	10/765	71/18670	0.000604602	0.00523083	0.00437631	ECT2/BLM/RAD51/RAD51AP1/CHEK2/FIGNL1/INTS7/XRCC5/KDM1A/CRYAB	10
BP	GO:1902369	negative regulation of RNA catabolic process	9/765	59/18670	0.000621043	0.00536102	0.00448523	E2F1/HNRNPA0/DHX9/SYNCRIP/ELAVL1/DKC1/HNRNPD/RBM10/HNRNPU	9
BP	GO:0016446	somatic hypermutation of immunoglobulin genes	5/765	18/18670	0.000625581	0.00538811	0.00450789	EXO1/POLQ/MSH6/MSH2/UNG	5
BP	GO:0051569	regulation of histone H3-K4 methylation	6/765	27/18670	0.00065627	0.00563982	0.00471848	BRCA1/MYB/DNMT1/KDM1A/BCOR/PAXIP1	6
BP	GO:0001824	blastocyst development	12/765	98/18670	0.000659452	0.00565454	0.0047308	BRCA2/GINS1/NCAPG2/ASF1B/NEK2/ACTL6A/NASP/RBBP8/GINS4/TET1/PHF6/BCOR	12
BP	GO:0007140	male meiotic nuclear division	8/765	48/18670	0.000675232	0.00575216	0.00481247	KIF18A/BRCA2/TRIP13/FANCA/MYBL1/FIGNL1/TEX15/RAD51C	8
BP	GO:0051972	regulation of telomerase activity	8/765	48/18670	0.000675232	0.00575216	0.00481247	AURKB/NEK2/WRAP53/DKC1/HNRNPD/XRCC5/NVL/CCT2	8
BP	GO:0006305	DNA alkylation	10/765	72/18670	0.000676812	0.00575216	0.00481247	BRCA1/EZH2/DNMT1/TRIM28/CTCF/BEND3/EHMT2/PARP1/PPM1D/DNMT3A	10
BP	GO:0006306	DNA methylation	10/765	72/18670	0.000676812	0.00575216	0.00481247	BRCA1/EZH2/DNMT1/TRIM28/CTCF/BEND3/EHMT2/PARP1/PPM1D/DNMT3A	10
BP	GO:0035404	histone-serine phosphorylation	4/765	11/18670	0.000732703	0.0061998	0.00518698	CCNB1/AURKA/AURKB/VRK1	4
BP	GO:0045835	negative regulation of meiotic nuclear division	4/765	11/18670	0.000732703	0.0061998	0.00518698	TTK/FBXO5/TRIP13/FBXO43	4
BP	GO:0031396	regulation of protein ubiquitination	19/765	204/18670	0.00075159	0.00634566	0.00530901	FANCI/UBE2C/PLK1/FBXO5/CDC20/MAD2L1/BRCA1/SKP2/MASTL/FANCM/MTBP/U2AF2/UBE2S/RPS7/MTA1/KDM1A/PAXIP1/AIMP2/FBXO2	19
BP	GO:0006303	double-strand break repair via nonhomologous end joining	11/765	86/18670	0.00075623	0.00637087	0.0053301	POLQ/BRCA1/POLA1/DCLRE1B/PRKDC/WRAP53/BARD1/XRCC5/NHEJ1/PAXIP1/LIG3	11
BP	GO:0051445	regulation of meiotic cell cycle	8/765	49/18670	0.000778447	0.00654371	0.00547471	TTK/ASPM/FBXO5/CDC20/TRIP13/CDC25C/CDC25A/FBXO43	8
BP	GO:0006606	protein import into nucleus	15/765	143/18670	0.000788238	0.00661158	0.0055315	ECT2/NUP107/CSE1L/NUP188/TRIM28/IPO5/NUP155/NUP35/NUP62/KPNA2/NUP88/NUP50/NUP93/PHB2/RAN	15
BP	GO:0002566	somatic diversification of immune receptors via somatic mutation	5/765	19/18670	0.00082057	0.00680861	0.00569633	EXO1/POLQ/MSH6/MSH2/UNG	5
BP	GO:0006337	nucleosome disassembly	5/765	19/18670	0.00082057	0.00680861	0.00569633	SET/SMARCC1/ARID2/SMARCD1/SMARCA4	5
BP	GO:0007096	regulation of exit from mitosis	5/765	19/18670	0.00082057	0.00680861	0.00569633	ANLN/UBE2C/CDCA5/KNTC1/PHB2	5
BP	GO:0009127	purine nucleoside monophosphate biosynthetic process	5/765	19/18670	0.00082057	0.00680861	0.00569633	PAICS/PPAT/GMPS/PFAS/GART	5
BP	GO:0009168	purine ribonucleoside monophosphate biosynthetic process	5/765	19/18670	0.00082057	0.00680861	0.00569633	PAICS/PPAT/GMPS/PFAS/GART	5
BP	GO:0018022	peptidyl-lysine methylation	14/765	129/18670	0.000833024	0.00689708	0.00577035	BRCA1/SUV39H2/EZH2/MYB/DNMT1/PHF19/BEND3/DOT1L/SUV39H1/EHMT2/SUZ12/KDM1A/BCOR/PAXIP1	14
BP	GO:0009161	ribonucleoside monophosphate metabolic process	8/765	50/18670	0.000893969	0.0073858	0.00617923	PAICS/UMPS/PPAT/GMPS/PFAS/CAD/GART/UPP1	8
BP	GO:0046824	positive regulation of nucleocytoplasmic transport	9/765	62/18670	0.000898977	0.00739738	0.00618892	ECT2/GTSE1/TRIM28/IPO5/ANP32B/DHX9/CPSF6/CTDSPL2/RAN	9
BP	GO:0006997	nucleus organization	14/765	130/18670	0.000899214	0.00739738	0.00618892	CCNB2/CCNB1/CDK1/PLK1/HMGB2/VRK1/SRPK1/NUP107/NUP205/NUP155/NUP35/WRAP53/NUP93/SERBP1	14
BP	GO:0009163	nucleoside biosynthetic process	7/765	39/18670	0.000922231	0.00757055	0.0063338	DTYMK/TK1/UMPS/PRTFDC1/GMPS/CAD/UPP1	7
BP	GO:0007623	circadian rhythm	19/765	208/18670	0.000949673	0.00777924	0.0065084	CDK1/TOP2A/TYMS/TIMELESS/SUV39H2/EZH2/PRKDC/CDK4/NONO/PPP1CC/HDAC2/HNRNPD/HNRNPR/SUV39H1/MTA1/AHCY/HNRNPU/BHLHE41/KCNA2	19
BP	GO:0000132	establishment of mitotic spindle orientation	6/765	29/18670	0.000982165	0.0080113	0.00670255	NDC80/PLK1/MAD2L1/CENPA/CDK5RAP2/NDE1	6
BP	GO:0015949	nucleobase-containing small molecule interconversion	6/765	29/18670	0.000982165	0.0080113	0.00670255	TYMS/RRM2/DTYMK/RRM1/DUT/CTPS2	6
BP	GO:0031398	positive regulation of protein ubiquitination	13/765	117/18670	0.00101323	0.00824725	0.00689995	FANCI/UBE2C/PLK1/CDC20/BRCA1/SKP2/MASTL/FANCM/UBE2S/MTA1/KDM1A/PAXIP1/AIMP2	13
BP	GO:0046655	folic acid metabolic process	5/765	20/18670	0.00105749	0.00854843	0.00715193	DHFR/MTHFD1/SHMT1/SHMT2/MTHFD2	5
BP	GO:0019058	viral life cycle	26/765	328/18670	0.00106323	0.00854843	0.00715193	CDK1/TOP2A/TRIM59/SRPK1/DEK/NUP107/ILF3/NUP188/TRIM28/NUP205/NUP155/NUP37/NUP35/NUP62/KPNA2/PCBP2/SMC3/NUP88/XPO1/NUP50/NUP160/NUP210/NUP93/AAAS/RAN/HTR2A	26
BP	GO:0009265	2'-deoxyribonucleotide biosynthetic process	4/765	12/18670	0.00106356	0.00854843	0.00715193	TYMS/DTYMK/DUT/SHMT1	4
BP	GO:0010826	negative regulation of centrosome duplication	4/765	12/18670	0.00106356	0.00854843	0.00715193	BRCA1/CCNF/CDK5RAP2/NPM1	4
BP	GO:0032042	mitochondrial DNA metabolic process	4/765	12/18670	0.00106356	0.00854843	0.00715193	DNA2/TOP3A/PARP1/LIG3	4
BP	GO:0046385	deoxyribose phosphate biosynthetic process	4/765	12/18670	0.00106356	0.00854843	0.00715193	TYMS/DTYMK/DUT/SHMT1	4
BP	GO:0016445	somatic diversification of immunoglobulins	9/765	64/18670	0.00113489	0.00910275	0.0076157	EXO1/POLQ/ATAD5/MSH6/MSH2/UNG/PRKDC/PAXIP1/TCF3	9
BP	GO:0016447	somatic recombination of immunoglobulin gene segments	8/765	52/18670	0.00116613	0.00929526	0.00777676	EXO1/ATAD5/MSH6/MSH2/UNG/PRKDC/PAXIP1/TCF3	8
BP	GO:0051438	regulation of ubiquitin-protein transferase activity	8/765	52/18670	0.00116613	0.00929526	0.00777676	UBE2C/PLK1/FBXO5/CDC20/MAD2L1/MASTL/UBE2S/RPS7	8
BP	GO:1902373	negative regulation of mRNA catabolic process	8/765	52/18670	0.00116613	0.00929526	0.00777676	E2F1/HNRNPA0/DHX9/SYNCRIP/ELAVL1/HNRNPD/RBM10/HNRNPU	8
BP	GO:0009135	purine nucleoside diphosphate metabolic process	14/765	134/18670	0.00121002	0.00960531	0.00803616	NUP107/NUP188/NUP205/NUP155/NUP37/NUP35/NUP62/NUP88/NUP50/NUP160/NUP210/NUP93/AAAS/HTR2A	14
BP	GO:0009179	purine ribonucleoside diphosphate metabolic process	14/765	134/18670	0.00121002	0.00960531	0.00803616	NUP107/NUP188/NUP205/NUP155/NUP37/NUP35/NUP62/NUP88/NUP50/NUP160/NUP210/NUP93/AAAS/HTR2A	14
BP	GO:0022618	ribonucleoprotein complex assembly	20/765	229/18670	0.00123035	0.00974661	0.00815437	SRPK1/RBMX/SNRPB/SNRNP200/DHX9/RUVBL1/SRSF1/SNRPF/POLR2D/SNRPD1/RPL6/RPLP0/USP39/CPSF6/GEMIN4/RUVBL2/SNRPE/SRSF6/NOP2/SRSF9	20
BP	GO:0031060	regulation of histone methylation	9/765	65/18670	0.00127031	0.0100425	0.00840194	BRCA1/MYB/DNMT1/CTCF/PHF19/TET1/KDM1A/BCOR/PAXIP1	9
BP	GO:1903322	positive regulation of protein modification by small protein conjugation or removal	14/765	135/18670	0.00130042	0.0102594	0.00858342	FANCI/UBE2C/PLK1/CDC20/BRCA1/SKP2/MASTL/FANCM/UBE2S/MTA1/KDM1A/PAXIP1/AIMP2/UBE2I	14
BP	GO:0031498	chromatin disassembly	5/765	21/18670	0.00134158	0.0105195	0.00880099	SET/SMARCC1/ARID2/SMARCD1/SMARCA4	5
BP	GO:0032986	protein-DNA complex disassembly	5/765	21/18670	0.00134158	0.0105195	0.00880099	SET/SMARCC1/ARID2/SMARCD1/SMARCA4	5
BP	GO:0070734	histone H3-K27 methylation	5/765	21/18670	0.00134158	0.0105195	0.00880099	EZH2/PHF19/BEND3/EHMT2/SUZ12	5
BP	GO:1903320	regulation of protein modification by small protein conjugation or removal	20/765	231/18670	0.00136709	0.0106977	0.00895012	FANCI/UBE2C/PLK1/FBXO5/CDC20/MAD2L1/BRCA1/SKP2/MASTL/FANCM/MTBP/U2AF2/UBE2S/RPS7/MTA1/KDM1A/PAXIP1/AIMP2/UBE2I/FBXO2	20
BP	GO:0007292	female gamete generation	14/765	136/18670	0.00139639	0.0109049	0.00912344	NCAPH/TTK/ASPM/CCNB1/TOP2A/PLK1/BRCA2/FBXO5/AURKA/TRIP13/MCM8/MASTL/RAD51C/RPS6	14
BP	GO:0010458	exit from mitosis	6/765	31/18670	0.00141992	0.0110662	0.00925839	ANLN/UBE2C/CDCA5/KNTC1/UBE2S/PHB2	6
BP	GO:0090503	RNA phosphodiester bond hydrolysis, exonucleolytic	7/765	42/18670	0.00145439	0.011312	0.009464	EXOSC2/EXOSC8/XRN2/EXOSC9/CNOT1/CNOT6/ERI2	7
BP	GO:0000054	ribosomal subunit export from nucleus	4/765	13/18670	0.00148671	0.0113568	0.0095015	NUP88/XPO1/NPM1/RAN	4
BP	GO:0000212	meiotic spindle organization	4/765	13/18670	0.00148671	0.0113568	0.0095015	ASPM/FBXO5/ESPL1/AURKA	4
BP	GO:0000722	telomere maintenance via recombination	4/765	13/18670	0.00148671	0.0113568	0.0095015	BRCA2/RAD51/XRCC3/RAD51C	4
BP	GO:0001833	inner cell mass cell proliferation	4/765	13/18670	0.00148671	0.0113568	0.0095015	BRCA2/GINS1/NCAPG2/GINS4	4
BP	GO:0009162	deoxyribonucleoside monophosphate metabolic process	4/765	13/18670	0.00148671	0.0113568	0.0095015	TYMS/TK1/DUT/SHMT1	4
BP	GO:0009223	pyrimidine deoxyribonucleotide catabolic process	4/765	13/18670	0.00148671	0.0113568	0.0095015	UNG/TDG/DUT/DCTPP1	4
BP	GO:0033750	ribosome localization	4/765	13/18670	0.00148671	0.0113568	0.0095015	NUP88/XPO1/NPM1/RAN	4
BP	GO:0035563	positive regulation of chromatin binding	4/765	13/18670	0.00148671	0.0113568	0.0095015	GMNN/CDT1/DDX11/KDM1A	4
BP	GO:0046040	IMP metabolic process	4/765	13/18670	0.00148671	0.0113568	0.0095015	PAICS/PPAT/PFAS/GART	4
BP	GO:0007018	microtubule-based movement	23/765	285/18670	0.00159603	0.0121677	0.01018	KIF20A/KIF14/DLGAP5/KIF23/KIF11/KIF4A/KIF18A/RACGAP1/KIF2C/KIFC1/KIF15/CENPE/KIF20B/KIF22/KIF24/KIF18B/NDE1/SYNE2/WASF1/HNRNPU/DYNC1I1/MAP1A/HAP1	23
BP	GO:1901659	glycosyl compound biosynthetic process	7/765	43/18670	0.00167677	0.0127437	0.0106619	DTYMK/TK1/UMPS/PRTFDC1/GMPS/CAD/UPP1	7
BP	GO:0032069	regulation of nuclease activity	5/765	22/18670	0.0016782	0.0127437	0.0106619	PCNA/HMGB2/DDX11/HMGB1/NPM1	5
BP	GO:0046034	ATP metabolic process	24/765	304/18670	0.00171672	0.0130106	0.0108851	CCNB1/CDK1/NUP107/FIGNL1/MSH2/NUP188/NUP205/NUP155/NUP37/NUP35/NUP62/BEND3/NUP88/NUP50/NUP160/PARP1/NUP210/NUP93/AAAS/SHMT2/NUDT5/HTR2A/ADCYAP1/ATP1A2	24
BP	GO:0051101	regulation of DNA binding	13/765	124/18670	0.00173005	0.0130858	0.0109481	HJURP/HMGB2/CDCA5/E2F1/NEK2/CDT1/TRIM28/HDAC2/ZNF675/DOT1L/PARP1/HMGB1/KDM1A	13
BP	GO:0071826	ribonucleoprotein complex subunit organization	20/765	236/18670	0.00176678	0.0133375	0.0111586	SRPK1/RBMX/SNRPB/SNRNP200/DHX9/RUVBL1/SRSF1/SNRPF/POLR2D/SNRPD1/RPL6/RPLP0/USP39/CPSF6/GEMIN4/RUVBL2/SNRPE/SRSF6/NOP2/SRSF9	20
BP	GO:0006473	protein acetylation	18/765	204/18670	0.00188492	0.014177	0.011861	ESCO2/BRCA2/DSCC1/BRCA1/CHEK1/TAF5/ACTL6A/CTCF/HDAC2/SET/RUVBL1/BAZ1A/BEND3/YEATS4/PAXIP1/RUVBL2/FAM161A/NAP1L2	18
BP	GO:0097327	response to antineoplastic agent	11/765	96/18670	0.00188535	0.014177	0.011861	BLM/RAD51/PCNA/TIMELESS/BRCA1/DHFR/DDX11/CDK4/HNRNPA1/HNRNPD/EIF4EBP1	11
BP	GO:0007019	microtubule depolymerization	7/765	44/18670	0.00192469	0.0144445	0.0120848	KIF18A/KIF2C/CKAP2/KIF24/KIF18B/CKAP5/MAP1A	7
BP	GO:0043928	exonucleolytic catabolism of deadenylated mRNA	6/765	33/18670	0.00199247	0.0149242	0.0124861	EXOSC2/LSM5/EXOSC8/EXOSC9/CNOT6/EDC3	6
BP	GO:0022412	cellular process involved in reproduction in multicellular organism	27/765	361/18670	0.00200536	0.0149427	0.0125016	NCAPH/TTK/ASPM/CCNB1/KIF18A/TOP2A/BRIP1/PLK1/BRCA2/FBXO5/AURKA/TRIP13/HMGB2/FANCA/FANCG/MYBL1/MASTL/SRPK1/FIGNL1/FANCC/MSH2/TEX15/STRBP/DAZAP1/RAD51C/RPS6/DNMT3A	27
BP	GO:0006244	pyrimidine nucleotide catabolic process	4/765	14/18670	0.00201436	0.0149427	0.0125016	UNG/TDG/DUT/DCTPP1	4
BP	GO:0006999	nuclear pore organization	4/765	14/18670	0.00201436	0.0149427	0.0125016	NUP107/NUP205/NUP35/NUP93	4
BP	GO:0071428	rRNA-containing ribonucleoprotein complex export from nucleus	4/765	14/18670	0.00201436	0.0149427	0.0125016	NUP88/XPO1/NPM1/RAN	4
BP	GO:0072425	signal transduction involved in G2 DNA damage checkpoint	4/765	14/18670	0.00201436	0.0149427	0.0125016	DTL/PLK1/BRCA1/CHEK1	4
BP	GO:0006541	glutamine metabolic process	5/765	23/18670	0.00207286	0.0153177	0.0128154	PPAT/GMPS/CTPS2/PFAS/CAD	5
BP	GO:0035561	regulation of chromatin binding	5/765	23/18670	0.00207286	0.0153177	0.0128154	GMNN/CDT1/DDX11/TDG/KDM1A	5
BP	GO:0045143	homologous chromosome segregation	8/765	57/18670	0.00214008	0.0157841	0.0132056	PTTG1/BRIP1/PLK1/ESPL1/TRIP13/FANCD2/CCNE2/TEX15	8
BP	GO:0000956	nuclear-transcribed mRNA catabolic process	18/765	207/18670	0.00221367	0.0162957	0.0136336	EXOSC2/LSM5/EXOSC8/EXOSC9/CNOT1/MAGOHB/POLR2D/RPS15A/RPL6/RPS7/RPLP0/CNOT6/RPL4/EDC3/RPL18A/RPS21/RPS24/RPS6	18
BP	GO:0031056	regulation of histone modification	14/765	143/18670	0.00224767	0.0165143	0.0138165	CCNB1/BRCA1/CHEK1/MYB/DNMT1/CTCF/SET/PHF19/TET1/KDM1A/BCOR/PAXIP1/RUVBL2/NAP1L2	14
BP	GO:0017038	protein import	17/765	192/18670	0.00239769	0.0175831	0.0147106	ECT2/NUP107/CSE1L/NUP188/TRIM28/IPO5/NUP155/NUP35/NUP62/KPNA2/NUP88/NUP50/NUP93/PHB2/RAN/TOMM22/CLU	17
BP	GO:0042752	regulation of circadian rhythm	12/765	114/18670	0.00247735	0.0181327	0.0151705	CDK1/TOP2A/TIMELESS/SUV39H2/EZH2/PRKDC/NONO/PPP1CC/HNRNPD/SUV39H1/MTA1/KCNA2	12
BP	GO:0031573	intra-S DNA damage checkpoint	4/765	15/18670	0.00265852	0.0193851	0.0162183	EME1/CHEK2/MSH2/TIPIN	4
BP	GO:0033151	V(D)J recombination	4/765	15/18670	0.00265852	0.0193851	0.0162183	HMGB2/PRKDC/HMGB1/TCF3	4
BP	GO:2000756	regulation of peptidyl-lysine acetylation	8/765	59/18670	0.00267346	0.0194571	0.0162785	BRCA1/CHEK1/CTCF/HDAC2/SET/PAXIP1/RUVBL2/NAP1L2	8
BP	GO:0000291	nuclear-transcribed mRNA catabolic process, exonucleolytic	6/765	35/18670	0.00272419	0.0197146	0.0164939	EXOSC2/LSM5/EXOSC8/EXOSC9/CNOT6/EDC3	6
BP	GO:0051294	establishment of spindle orientation	6/765	35/18670	0.00272419	0.0197146	0.0164939	NDC80/PLK1/MAD2L1/CENPA/CDK5RAP2/NDE1	6
BP	GO:0060251	regulation of glial cell proliferation	6/765	35/18670	0.00272419	0.0197146	0.0164939	E2F1/MYB/IDH2/PPP1CC/ADCYAP1/SOX10	6
BP	GO:0031100	animal organ regeneration	9/765	73/18670	0.00288733	0.0208169	0.0174162	CCNA2/CDK1/TYMS/PCNA/AURKA/EZH2/CDK4/PPAT/CAD	9
BP	GO:1901983	regulation of protein acetylation	9/765	73/18670	0.00288733	0.0208169	0.0174162	BRCA1/CHEK1/CTCF/HDAC2/SET/PAXIP1/RUVBL2/FAM161A/NAP1L2	9
BP	GO:0051781	positive regulation of cell division	10/765	87/18670	0.00291712	0.0209924	0.017563	KIF14/KIF23/ECT2/RACGAP1/AURKB/CDC6/KIF20B/CENPV/CIT/NUP62	10
BP	GO:0008334	histone mRNA metabolic process	5/765	25/18670	0.00305866	0.0219699	0.0183808	SNRPB/ZNF473/SNRPF/CPSF3/SNRPE	5
BP	GO:0014015	positive regulation of gliogenesis	9/765	74/18670	0.00317044	0.0226962	0.0189884	E2F1/MYB/PPP1CC/HDAC2/TIAM1/ASPA/PTPRZ1/IL34/SOX10	9
BP	GO:0006364	rRNA processing	18/765	214/18670	0.00317157	0.0226962	0.0189884	RRP1B/EXOSC2/PA2G4/TEX10/EXOSC8/DKC1/XRN2/EXOSC9/SUV39H1/RPS7/NVL/NOL11/GEMIN4/FBL/RPS21/NOP2/RPS24/RPS6	18
BP	GO:0030865	cortical cytoskeleton organization	7/765	48/18670	0.00321095	0.0228929	0.019153	KIF23/ANLN/ECT2/RACGAP1/CIT/PPP2R3C/EPB41L1	7
BP	GO:0043628	ncRNA 3'-end processing	7/765	48/18670	0.00321095	0.0228929	0.019153	EXOSC2/INTS7/EXOSC8/DKC1/EXOSC9/FBL/RPS21	7
BP	GO:1905269	positive regulation of chromatin organization	11/765	103/18670	0.00329682	0.0234616	0.0196289	CCNB1/BRCA1/MYB/DNMT1/TRIM28/PHF19/TET1/KDM1A/PAXIP1/RUVBL2/NAP1L2	11
BP	GO:0051447	negative regulation of meiotic cell cycle	4/765	16/18670	0.00343088	0.0243258	0.0203519	TTK/FBXO5/TRIP13/FBXO43	4
BP	GO:0051571	positive regulation of histone H3-K4 methylation	4/765	16/18670	0.00343088	0.0243258	0.0203519	BRCA1/MYB/DNMT1/PAXIP1	4
BP	GO:1902117	positive regulation of organelle assembly	9/765	75/18670	0.00347497	0.0245931	0.0205755	PLK4/SPAG5/CENPJ/CEP135/G3BP1/NUP62/CNOT1/CNOT6/HAP1	9
BP	GO:0008630	intrinsic apoptotic signaling pathway in response to DNA damage	11/765	104/18670	0.00355394	0.0251058	0.0210044	BRCA2/BRCA1/E2F1/ATAD5/CHEK2/MSH6/MSH2/PRKDC/CASP2/KDM1A/CLU	11
BP	GO:0001556	oocyte maturation	5/765	26/18670	0.00366106	0.025721	0.0215191	CCNB1/BRCA2/FBXO5/AURKA/TRIP13	5
BP	GO:0006346	DNA methylation-dependent heterochromatin assembly	5/765	26/18670	0.00366106	0.025721	0.0215191	HELLS/DNMT1/TRIM28/TET1/DNMT3A	5
BP	GO:0080111	DNA demethylation	5/765	26/18670	0.00366106	0.025721	0.0215191	TRIM28/TDG/TET1/APEX1/ALKBH2	5
BP	GO:0031058	positive regulation of histone modification	10/765	90/18670	0.00373927	0.0262226	0.0219388	CCNB1/BRCA1/MYB/DNMT1/PHF19/TET1/KDM1A/PAXIP1/RUVBL2/NAP1L2	10
BP	GO:0050769	positive regulation of neurogenesis	32/765	474/18670	0.00407254	0.0285077	0.0238506	ASPM/ECT2/XRCC2/KIF20B/E2F1/EZH2/MYB/PPP1CC/HDAC2/XRCC5/TIAM1/KDM1A/ADNP/NAP1L1/HOXD3/FBXW8/TCF3/PPP2R5B/DAB1/BEND6/ADCYAP1/PLXNB3/NAP1L2/NDRG4/ASPA/PTPRZ1/IL34/TRPV2/SOX10/CPNE6/ITGA3/HAP1	32
BP	GO:0018394	peptidyl-lysine acetylation	15/765	169/18670	0.00410822	0.0287053	0.024016	BRCA2/BRCA1/CHEK1/TAF5/ACTL6A/CTCF/HDAC2/SET/RUVBL1/BAZ1A/BEND3/YEATS4/PAXIP1/RUVBL2/NAP1L2	15
BP	GO:0046825	regulation of protein export from nucleus	6/765	38/18670	0.00417615	0.0291272	0.0243689	GTSE1/ANP32B/BARD1/XPO1/XPO5/CTDSPL2	6
BP	GO:0006978	DNA damage response, signal transduction by p53 class mediator resulting in transcription of p21 class mediator	4/765	17/18670	0.0043427	0.0298116	0.0249415	FOXM1/BRCA2/BRCA1/CHEK2	4
BP	GO:0009070	serine family amino acid biosynthetic process	4/765	17/18670	0.0043427	0.0298116	0.0249415	MTHFD1/SEPHS1/SHMT1/SHMT2	4
BP	GO:0042790	nucleolar large rRNA transcription by RNA polymerase I	4/765	17/18670	0.0043427	0.0298116	0.0249415	DDX11/NOL11/SMARCA4/POLR1E	4
BP	GO:0043968	histone H2A acetylation	4/765	17/18670	0.0043427	0.0298116	0.0249415	ACTL6A/RUVBL1/YEATS4/RUVBL2	4
BP	GO:0062033	positive regulation of mitotic sister chromatid segregation	4/765	17/18670	0.0043427	0.0298116	0.0249415	DLGAP5/ESPL1/CDT1/HNRNPU	4
BP	GO:0097329	response to antimetabolite	4/765	17/18670	0.0043427	0.0298116	0.0249415	BLM/TIMELESS/DHFR/DDX11	4
BP	GO:2000001	regulation of DNA damage checkpoint	4/765	17/18670	0.0043427	0.0298116	0.0249415	WDR76/RFWD3/CHEK2/RNASEH2B	4
BP	GO:0071514	genetic imprinting	5/765	27/18670	0.00434397	0.0298116	0.0249415	BRCA1/TRIM28/CTCF/DNMT3A/DIRAS3	5
BP	GO:0090169	regulation of spindle assembly	5/765	27/18670	0.00434397	0.0298116	0.0249415	PLK1/SPAG5/SMC1A/SMC3/HNRNPU	5
BP	GO:0051053	negative regulation of DNA metabolic process	12/765	123/18670	0.00462789	0.0317035	0.0265243	BLM/POLQ/FANCB/ZNF93/MSH6/MSH2/TRIM28/HNRNPA1/ZRANB3/XRCC5/PARP1/HNRNPU	12
BP	GO:0010972	negative regulation of G2/M transition of mitotic cell cycle	10/765	93/18670	0.00473497	0.0323795	0.0270899	CDK1/BLM/AURKA/AURKB/BRCA1/CDC6/CLSPN/ORC1/TOPBP1/DONSON	10
BP	GO:0031062	positive regulation of histone methylation	6/765	39/18670	0.00476778	0.0324884	0.027181	BRCA1/MYB/DNMT1/PHF19/TET1/PAXIP1	6
BP	GO:0072529	pyrimidine-containing compound catabolic process	6/765	39/18670	0.00476778	0.0324884	0.027181	UNG/TDG/DUT/TET1/DCTPP1/UPP1	6
BP	GO:0016573	histone acetylation	14/765	156/18670	0.0049526	0.0336882	0.0281848	BRCA2/BRCA1/CHEK1/TAF5/ACTL6A/CTCF/SET/RUVBL1/BAZ1A/BEND3/YEATS4/PAXIP1/RUVBL2/NAP1L2	14
BP	GO:0006998	nuclear envelope organization	7/765	52/18670	0.0050679	0.0344008	0.0287809	CCNB2/CCNB1/CDK1/PLK1/VRK1/NUP155/NUP93	7
BP	GO:0019693	ribose phosphate metabolic process	29/765	424/18670	0.00507523	0.0344008	0.0287809	NUP107/PAICS/NUP188/UMPS/NUP205/NUP155/NUP37/NUP35/PPAT/NUP62/NUP88/GMPS/CTPS2/PFAS/CAD/NUP50/NUP160/PARP1/NUP210/PDE7A/NUP93/AAAS/RAN/GART/NUDT5/RNASEH2B/HTR2A/PDE7B/UPP1	29
BP	GO:0071214	cellular response to abiotic stimulus	24/765	331/18670	0.00509511	0.0344143	0.0287923	PBK/ECT2/BLM/RAD51/RAD51AP1/PCNA/AURKB/CHEK1/CDC25A/CHEK2/FIGNL1/POLH/INTS7/POLD1/CASP8AP2/CASP2/XRCC5/PARP1/NPM1/KDM1A/POLD3/RUVBL2/CRYAB/ATP1A2	24
BP	GO:0104004	cellular response to environmental stimulus	24/765	331/18670	0.00509511	0.0344143	0.0287923	PBK/ECT2/BLM/RAD51/RAD51AP1/PCNA/AURKB/CHEK1/CDC25A/CHEK2/FIGNL1/POLH/INTS7/POLD1/CASP8AP2/CASP2/XRCC5/PARP1/NPM1/KDM1A/POLD3/RUVBL2/CRYAB/ATP1A2	24
BP	GO:0016072	rRNA metabolic process	18/765	225/18670	0.00535629	0.0361151	0.0302152	RRP1B/EXOSC2/PA2G4/TEX10/EXOSC8/DKC1/XRN2/EXOSC9/SUV39H1/RPS7/NVL/NOL11/GEMIN4/FBL/RPS21/NOP2/RPS24/RPS6	18
BP	GO:0000712	resolution of meiotic recombination intermediates	4/765	18/18670	0.00540473	0.0361254	0.0302238	TOP2A/EME1/FANCM/RMI1	4
BP	GO:0006349	regulation of gene expression by genetic imprinting	4/765	18/18670	0.00540473	0.0361254	0.0302238	BRCA1/CTCF/DNMT3A/DIRAS3	4
BP	GO:0009048	dosage compensation by inactivation of X chromosome	4/765	18/18670	0.00540473	0.0361254	0.0302238	BRCA1/RBM15/RBM15B/HNRNPU	4
BP	GO:0009200	deoxyribonucleoside triphosphate metabolic process	4/765	18/18670	0.00540473	0.0361254	0.0302238	TYMS/DTYMK/DUT/DCTPP1	4
BP	GO:0042772	DNA damage response, signal transduction resulting in transcription	4/765	18/18670	0.00540473	0.0361254	0.0302238	FOXM1/BRCA2/BRCA1/CHEK2	4
BP	GO:0009266	response to temperature stimulus	19/765	243/18670	0.00548354	0.0365886	0.0306114	NUP107/NUP188/NUP205/NUP155/HDAC2/NUP37/NUP35/NUP62/NUP88/POLR2D/NUP50/NUP160/NUP210/NUP93/AAAS/HTR2A/CAMK2A/TRPV2/CRYAB	19
BP	GO:0035065	regulation of histone acetylation	7/765	53/18670	0.00563747	0.0375506	0.0314162	BRCA1/CHEK1/CTCF/SET/PAXIP1/RUVBL2/NAP1L2	7
BP	GO:0051642	centrosome localization	5/765	29/18670	0.00597355	0.0397205	0.0332316	ASPM/MAD2L1/AURKA/NDE1/SYNE2	5
BP	GO:0001701	in utero embryonic development	26/765	373/18670	0.00607455	0.0403225	0.0337353	CCNB2/CCNB1/PLK4/BRCA2/GINS1/XRCC2/E2F8/STIL/NCAPG2/ASF1B/E2F7/NEK2/ACTL6A/MSH2/NASP/TRIM28/RBBP8/GINS4/PRMT1/TET1/PHF6/DHX35/BCOR/ENDOG/RNASEH2B/SOX10	26
BP	GO:0018393	internal peptidyl-lysine acetylation	14/765	161/18670	0.00652035	0.043099	0.0360583	BRCA2/BRCA1/CHEK1/TAF5/ACTL6A/CTCF/SET/RUVBL1/BAZ1A/BEND3/YEATS4/PAXIP1/RUVBL2/NAP1L2	14
BP	GO:0006222	UMP biosynthetic process	3/765	10/18670	0.00662478	0.043099	0.0360583	UMPS/CAD/UPP1	3
BP	GO:0009173	pyrimidine ribonucleoside monophosphate metabolic process	3/765	10/18670	0.00662478	0.043099	0.0360583	UMPS/CAD/UPP1	3
BP	GO:0009174	pyrimidine ribonucleoside monophosphate biosynthetic process	3/765	10/18670	0.00662478	0.043099	0.0360583	UMPS/CAD/UPP1	3
BP	GO:0009396	folic acid-containing compound biosynthetic process	3/765	10/18670	0.00662478	0.043099	0.0360583	DHFR/MTHFD1/GART	3
BP	GO:0034427	nuclear-transcribed mRNA catabolic process, exonucleolytic, 3'-5'	3/765	10/18670	0.00662478	0.043099	0.0360583	EXOSC2/EXOSC8/EXOSC9	3
BP	GO:0046049	UMP metabolic process	3/765	10/18670	0.00662478	0.043099	0.0360583	UMPS/CAD/UPP1	3
BP	GO:0048304	positive regulation of isotype switching to IgG isotypes	3/765	10/18670	0.00662478	0.043099	0.0360583	ATAD5/MSH2/PAXIP1	3
BP	GO:1901838	positive regulation of transcription of nucleolar large rRNA by RNA polymerase I	3/765	10/18670	0.00662478	0.043099	0.0360583	DDX11/NOL11/SMARCA4	3
BP	GO:1902101	positive regulation of metaphase/anaphase transition of cell cycle	3/765	10/18670	0.00662478	0.043099	0.0360583	DLGAP5/ESPL1/CDT1	3
BP	GO:0001832	blastocyst growth	4/765	19/18670	0.00662718	0.043099	0.0360583	BRCA2/GINS1/NCAPG2/GINS4	4
BP	GO:0009148	pyrimidine nucleoside triphosphate biosynthetic process	4/765	19/18670	0.00662718	0.043099	0.0360583	TYMS/DTYMK/CTPS2/CAD	4
BP	GO:0071482	cellular response to light stimulus	12/765	129/18670	0.00674871	0.0438143	0.0366567	PBK/PCNA/AURKB/CHEK1/CDC25A/POLH/POLD1/PARP1/NPM1/KDM1A/POLD3/RUVBL2	12
BP	GO:0009259	ribonucleotide metabolic process	28/765	414/18670	0.00675993	0.0438143	0.0366567	NUP107/PAICS/NUP188/UMPS/NUP205/NUP155/NUP37/NUP35/PPAT/NUP62/NUP88/GMPS/CTPS2/PFAS/CAD/NUP50/NUP160/PARP1/NUP210/PDE7A/NUP93/AAAS/RAN/GART/RNASEH2B/HTR2A/PDE7B/UPP1	28
BP	GO:0048145	regulation of fibroblast proliferation	9/765	83/18670	0.00681684	0.044109	0.0369032	CCNA2/CCNB1/CDC6/E2F1/MYB/PRKDC/CDK4/DHX9/RNASEH2B	9
BP	GO:0019886	antigen processing and presentation of exogenous peptide antigen via MHC class II	10/765	98/18670	0.00684516	0.0442179	0.0369944	KIF23/KIF11/KIF4A/KIF18A/RACGAP1/KIF2C/KIF15/CENPE/KIF22/DYNC1I1	10
BP	GO:0032781	positive regulation of ATPase activity	7/765	55/18670	0.00691853	0.044549	0.0372713	NCAPH/UHRF1/MSH6/MSH2/DNAJC9/DHX9/HNRNPU	7
BP	GO:0007568	aging	23/765	321/18670	0.00692167	0.044549	0.0372713	CDK1/FOXM1/BRCA2/FBXO5/TYMS/AURKB/CHEK1/RAD54L/RBL1/CHEK2/MSH6/MSH2/PRKDC/NUP62/CASP2/NPM1/APEX1/APAF1/ENDOG/DNMT3A/HTR2A/PLA2R1/CRYAB	23
BP	GO:0061842	microtubule organizing center localization	5/765	30/18670	0.00693113	0.044549	0.0372713	ASPM/MAD2L1/AURKA/NDE1/SYNE2	5
BP	GO:0000245	spliceosomal complex assembly	9/765	84/18670	0.00736534	0.0471823	0.0394744	SRPK1/RBMX/SNRNP200/SRSF1/SNRPD1/USP39/SNRPE/SRSF6/SRSF9	9
BP	GO:0048144	fibroblast proliferation	9/765	84/18670	0.00736534	0.0471823	0.0394744	CCNA2/CCNB1/CDC6/E2F1/MYB/PRKDC/CDK4/DHX9/RNASEH2B	9
BP	GO:0071236	cellular response to antibiotic	13/765	147/18670	0.00747882	0.0478297	0.0400161	CDK1/ECT2/PCNA/TIMELESS/EZH2/MYB/DDX11/HDAC2/HNRNPA1/APEX1/ENDOG/DNMT3A/CLU	13
BP	GO:0045292	mRNA cis splicing, via spliceosome	7/765	56/18670	0.00763448	0.0486635	0.0407137	SNRNP200/SRSF2/SRSF1/SRSF3/SRSF6/SRSF9/SRSF7	7
BP	GO:0051568	histone H3-K4 methylation	7/765	56/18670	0.00763448	0.0486635	0.0407137	BRCA1/MYB/DNMT1/BEND3/KDM1A/BCOR/PAXIP1	7
BP	GO:0030866	cortical actin cytoskeleton organization	6/765	43/18670	0.00776106	0.0493886	0.0413203	KIF23/ANLN/ECT2/RACGAP1/CIT/EPB41L1	6
BP	GO:0043161	proteasome-mediated ubiquitin-dependent protein catabolic process	28/765	419/18670	0.00790105	0.0501964	0.0419962	KIF14/PBK/BUB1B/CCNB1/CDK1/UBE2C/PTTG1/PLK1/FBXO5/CDC20/MAD2L1/AURKA/AURKB/SKP2/CCNF/CDK2/SMARCC1/PCBP2/UBE2S/SENP1/DET1/MTA1/ERCC8/ANAPC1/SOCS4/CLU/FBXO2/MAP1A	28
BP	GO:0034661	ncRNA catabolic process	5/765	31/18670	0.00799097	0.050204	0.0420025	EXOSC2/LIN28B/POP1/EXOSC8/EXOSC9	5
BP	GO:0040020	regulation of meiotic nuclear division	5/765	31/18670	0.00799097	0.050204	0.0420025	TTK/FBXO5/CDC20/TRIP13/FBXO43	5
BP	GO:0045737	positive regulation of cyclin-dependent protein serine/threonine kinase activity	5/765	31/18670	0.00799097	0.050204	0.0420025	CCNB1/CDC6/CKS1B/CKS2/PSRC1	5
BP	GO:0007095	mitotic G2 DNA damage checkpoint	4/765	20/18670	0.0080196	0.050204	0.0420025	CDK1/BLM/CLSPN/DONSON	4
BP	GO:0007549	dosage compensation	4/765	20/18670	0.0080196	0.050204	0.0420025	BRCA1/RBM15/RBM15B/HNRNPU	4
BP	GO:0009264	deoxyribonucleotide catabolic process	4/765	20/18670	0.0080196	0.050204	0.0420025	UNG/TDG/DUT/DCTPP1	4
BP	GO:0031061	negative regulation of histone methylation	4/765	20/18670	0.0080196	0.050204	0.0420025	BRCA1/DNMT1/KDM1A/BCOR	4
BP	GO:0046931	pore complex assembly	4/765	20/18670	0.0080196	0.050204	0.0420025	NUP107/NUP205/NUP93/CCT3	4
BP	GO:1901673	regulation of mitotic spindle assembly	4/765	20/18670	0.0080196	0.050204	0.0420025	PLK1/SMC1A/SMC3/HNRNPU	4
BP	GO:0007569	cell aging	11/765	116/18670	0.00807376	0.050461	0.0422176	CDK1/FOXM1/BRCA2/FBXO5/CHEK1/RBL1/CHEK2/PRKDC/NUP62/NPM1/PLA2R1	11
BP	GO:1901292	nucleoside phosphate catabolic process	8/765	71/18670	0.00836297	0.0521838	0.0436589	UNG/TDG/DUT/DCTPP1/PDE7A/NUDT5/PDE7B/UPP1	8
BP	GO:0002495	antigen processing and presentation of peptide antigen via MHC class II	10/765	101/18670	0.00842261	0.052471	0.0438992	KIF23/KIF11/KIF4A/KIF18A/RACGAP1/KIF2C/KIF15/CENPE/KIF22/DYNC1I1	10
BP	GO:0006475	internal protein amino acid acetylation	14/765	166/18670	0.0084616	0.0526287	0.0440311	BRCA2/BRCA1/CHEK1/TAF5/ACTL6A/CTCF/SET/RUVBL1/BAZ1A/BEND3/YEATS4/PAXIP1/RUVBL2/NAP1L2	14
BP	GO:0042063	gliogenesis	21/765	290/18670	0.00855192	0.0530865	0.0444142	CDK1/E2F1/EZH2/MYB/IDH2/PPP1CC/HDAC2/SYNE2/TIAM1/DAB1/ADCYAP1/CLU/HDAC11/ASPA/PTPRZ1/PLP1/IL34/SOX10/LGI4/MATN2/S100B	21
BP	GO:0006890	retrograde vesicle-mediated transport, Golgi to endoplasmic reticulum	9/765	86/18670	0.00856279	0.0530865	0.0444142	KIF23/KIF11/KIF4A/KIF18A/RACGAP1/KIF2C/KIF15/CENPE/KIF22	9
BP	GO:0045910	negative regulation of DNA recombination	6/765	44/18670	0.0086826	0.0537428	0.0449632	BLM/POLQ/FANCB/MSH6/MSH2/ZRANB3	6
BP	GO:0051573	negative regulation of histone H3-K9 methylation	3/765	11/18670	0.0088343	0.0542457	0.045384	BRCA1/DNMT1/KDM1A	3
BP	GO:0072711	cellular response to hydroxyurea	3/765	11/18670	0.0088343	0.0542457	0.045384	BLM/TIMELESS/DDX11	3
BP	GO:0090657	telomeric loop disassembly	3/765	11/18670	0.0088343	0.0542457	0.045384	BLM/XRCC3/RECQL4	3
BP	GO:1905820	positive regulation of chromosome separation	3/765	11/18670	0.0088343	0.0542457	0.045384	DLGAP5/ESPL1/CDT1	3
BP	GO:2000615	regulation of histone H3-K9 acetylation	3/765	11/18670	0.0088343	0.0542457	0.045384	BRCA1/CHEK1/NAP1L2	3
BP	GO:0002504	antigen processing and presentation of peptide or polysaccharide antigen via MHC class II	10/765	102/18670	0.00900607	0.0551246	0.0461193	KIF23/KIF11/KIF4A/KIF18A/RACGAP1/KIF2C/KIF15/CENPE/KIF22/DYNC1I1	10
BP	GO:0045814	negative regulation of gene expression, epigenetic	10/765	102/18670	0.00900607	0.0551246	0.0461193	ATAD2/CDC45/EZH2/DNMT1/PHF19/DOT1L/SUZ12/HMGB1/PPM1D/DNMT3A	10
BP	GO:0035510	DNA dealkylation	5/765	32/18670	0.00915822	0.0559669	0.046824	TRIM28/TDG/TET1/APEX1/ALKBH2	5
BP	GO:0046386	deoxyribose phosphate catabolic process	4/765	21/18670	0.0095909	0.0585182	0.0489585	UNG/TDG/DUT/DCTPP1	4
CC	GO:0098687	chromosomal region	105/782	347/19717	1.40634e-63	6.90513e-61	5.15165e-61	BUB1/TTK/CENPF/HJURP/NCAPG/BUB1B/ESCO2/SKA3/NDC80/CCNB1/CDK1/KIF18A/NUF2/CENPK/KIF2C/BLM/PLK1/BRCA2/CENPE/RAD51/CENPI/SPC25/PCNA/ERCC6L/SPC24/MCM6/BIRC5/NCAPD2/MCM3/ZWINT/MAD2L1/DSCC1/OIP5/SKA1/AURKA/AURKB/SPAG5/DSN1/MCM2/MCM4/CHEK1/CENPA/CENPO/MCM5/CDCA5/KNTC1/CDCA8/CENPH/HELLS/SUV39H2/EZH2/KIF22/ZWILCH/NEK2/ORC1/FEN1/CENPM/CENPL/MCM7/DNA2/DNMT1/INCENP/CHEK2/NUP107/CDK2/DCLRE1B/NCAPD3/MSH2/CENPV…	105
CC	GO:0000775	chromosome, centromeric region	74/782	193/19717	3.04085e-53	7.4653e-51	5.56957e-51	BUB1/TTK/CENPF/HJURP/NCAPG/BUB1B/ESCO2/SKA3/NDC80/CCNB1/KIF18A/NUF2/CENPK/KIF2C/PLK1/CENPE/CENPI/SPC25/ERCC6L/SPC24/BIRC5/NCAPD2/ZWINT/MAD2L1/DSCC1/OIP5/SKA1/AURKA/AURKB/SPAG5/DSN1/CENPA/CENPO/CDCA5/KNTC1/CDCA8/CENPH/HELLS/SUV39H2/KIF22/ZWILCH/NEK2/CENPM/CENPL/DNMT1/INCENP/NUP107/NCAPD3/CENPV/CDT1/SMC1A/CENPN/CTCF/MTBP/ITGB3BP/CENPQ/CENPP/PPP1CC/NUP37/CBX5/CBX3/RCC2/SMC3/NDE1/PHF6/SUV39H1/XPO1/NU…	74
CC	GO:0000793	condensed chromosome	73/782	223/19717	7.12641e-47	1.16636e-44	8.70172e-45	BUB1/NCAPH/CENPF/HJURP/NCAPG/BUB1B/SKA3/NDC80/MKI67/CCNB1/NUF2/CENPK/TOP2A/KIF2C/BLM/PLK1/BRCA2/CENPE/RAD51/SPC25/ERCC6L/SPC24/BIRC5/NCAPD2/ZWINT/MAD2L1/SKA1/SMC4/AURKA/AURKB/BRCA1/SPAG5/DSN1/FANCD2/HMGB2/CHEK1/CENPA/CENPO/CDCA5/KNTC1/CENPH/NCAPG2/ZWILCH/NEK2/SMC2/TOPBP1/CENPM/INCENP/NUP107/CDK2/RCC1/NCAPD3/CENPV/CDT1/SMC1A/CENPN/CTCF/ITGB3BP/PPP1CC/NUP37/CBX3/SMC3/NDE1/PHF6/SUV39H1/HMGB1/SKA2/TO…	73
CC	GO:0005819	spindle	82/782	347/19717	1.51094e-40	1.85468e-38	1.3837e-38	CKAP2L/TPX2/TTK/KIF20A/ASPM/KIF14/DLGAP5/KIF23/CENPF/KIF11/BUB1B/KIF4A/SKA3/NUSAP1/CCNB1/CDK1/KIF18A/ECT2/RACGAP1/KIFC1/PLK1/FBXO5/FAM83D/KIF15/CENPE/PRC1/CDC20/BIRC5/MAD2L1/ESPL1/SKA1/AURKA/AURKB/SPAG5/SHCBP1/CDC6/DSN1/TACC3/CKAP2/KNTC1/KIF20B/CDCA8/KIF22/VRK1/KIF18B/HAUS8/NEK2/TOPBP1/POC1A/WDR62/INCENP/HAUS6/CDC7/CDK5RAP2/CENPV/SMC1A/DDX11/HAUS1/CBX3/NUP62/PSRC1/RCC2/SMC3/NDE1/NEDD1/NPM1/HAUS3/…	82
CC	GO:0000776	kinetochore	54/782	135/19717	3.37742e-40	3.31662e-38	2.4744e-38	BUB1/TTK/CENPF/HJURP/BUB1B/SKA3/NDC80/CCNB1/KIF18A/NUF2/CENPK/KIF2C/PLK1/CENPE/CENPI/SPC25/ERCC6L/SPC24/BIRC5/ZWINT/MAD2L1/SKA1/AURKB/SPAG5/DSN1/CENPA/CENPO/KNTC1/CENPH/KIF22/ZWILCH/NEK2/CENPM/INCENP/NUP107/CENPV/CDT1/SMC1A/CENPN/MTBP/ITGB3BP/CENPQ/PPP1CC/NUP37/CBX5/NDE1/PHF6/XPO1/NUP160/SKA2/ORC2/HNRNPU/CKAP5/DYNC1I1	54
CC	GO:0000779	condensed chromosome, centromeric region	50/782	118/19717	8.79443e-39	7.19678e-37	5.36923e-37	BUB1/CENPF/HJURP/NCAPG/BUB1B/SKA3/NDC80/CCNB1/NUF2/CENPK/KIF2C/PLK1/CENPE/SPC25/ERCC6L/SPC24/BIRC5/NCAPD2/ZWINT/MAD2L1/SKA1/AURKA/AURKB/SPAG5/DSN1/CENPA/CENPO/KNTC1/CENPH/ZWILCH/NEK2/CENPM/INCENP/NUP107/NCAPD3/CENPV/CDT1/SMC1A/CENPN/ITGB3BP/PPP1CC/NUP37/CBX3/NDE1/PHF6/SKA2/ORC2/HNRNPU/CKAP5/DYNC1I1	50
CC	GO:0000777	condensed chromosome kinetochore	44/782	105/19717	5.32765e-34	3.73696e-32	2.788e-32	BUB1/CENPF/HJURP/BUB1B/SKA3/NDC80/CCNB1/NUF2/CENPK/KIF2C/PLK1/CENPE/SPC25/ERCC6L/SPC24/BIRC5/ZWINT/MAD2L1/SKA1/SPAG5/DSN1/CENPA/CENPO/KNTC1/CENPH/ZWILCH/NEK2/CENPM/INCENP/NUP107/CENPV/CDT1/SMC1A/CENPN/ITGB3BP/PPP1CC/NUP37/NDE1/PHF6/SKA2/ORC2/HNRNPU/CKAP5/DYNC1I1	44
CC	GO:0005657	replication fork	32/782	70/19717	1.57651e-26	9.67585e-25	7.21877e-25	MCM10/BLM/CDC45/PCNA/TIMELESS/GINS2/MCM3/UHRF1/XRCC2/RFC4/MMS22L/WDHD1/POLA2/RFC3/PRIM1/RFC5/POLA1/PRIM2/DNMT1/RAD18/POLH/RFC2/POLD1/XRCC3/POLD2/ZRANB3/TIPIN/GINS4/SMARCAD1/RAD51C/DONSON/POLD3	32
CC	GO:0000922	spindle pole	43/782	164/19717	1.25187e-23	6.82964e-22	5.09532e-22	CKAP2L/TPX2/ASPM/DLGAP5/CENPF/KIF11/CCNB1/PLK1/FAM83D/PRC1/CDC20/MAD2L1/AURKA/AURKB/SPAG5/CDC6/DSN1/TACC3/CKAP2/KNTC1/KIF20B/HAUS8/NEK2/TOPBP1/POC1A/WDR62/CDK5RAP2/SMC1A/DDX11/HAUS1/NUP62/PSRC1/SMC3/NDE1/NEDD1/NPM1/AAAS/ALMS1/HNRNPU/TUBGCP4/FAM161A/CKAP5/DYNC1I1	43
CC	GO:0072686	mitotic spindle	35/782	109/19717	1.08928e-22	5.34839e-21	3.99022e-21	CKAP2L/TPX2/ASPM/KIF23/KIF11/NUSAP1/CDK1/KIF18A/ECT2/RACGAP1/KIFC1/FAM83D/CENPE/MAD2L1/ESPL1/SKA1/AURKA/AURKB/SPAG5/TACC3/KIF20B/KIF22/KIF18B/CDC7/CDK5RAP2/SMC1A/NUP62/RCC2/SMC3/HAUS3/AGBL5/AAAS/HNRNPU/FAM161A/EML2	35
CC	GO:0005874	microtubule	63/782	416/19717	3.3031e-20	1.47439e-18	1.09998e-18	TPX2/KIF20A/ASPM/KIF14/KIF23/KIF11/KIF4A/SKA3/NUSAP1/CDK1/KIF18A/RACGAP1/KIF2C/KIFC1/GTSE1/PLK1/KIF15/CENPE/PRC1/BIRC5/SKA1/AURKA/AURKB/SPAG5/CKAP2/KNTC1/KIF20B/KIF22/KIF24/KIF18B/HAUS8/NEK2/CENPJ/INCENP/HAUS6/CDK5RAP2/HAUS1/PSRC1/RCC2/NDE1/TIAM1/MTA1/HAUS3/TTLL4/CCT7/SKA2/CCT2/CCT5/HAUS5/HAUS7/TUBD1/CCT3/GAS2L3/HNRNPU/TUBGCP4/FAM161A/CKAP5/SNPH/TPPP3/EML2/GABARAPL1/DYNC1I1/MAP1A	63
CC	GO:0000781	chromosome, telomeric region	35/782	158/19717	6.01545e-17	2.46132e-15	1.8363e-15	CDK1/BLM/BRCA2/RAD51/PCNA/MCM6/MCM3/MCM2/MCM4/CHEK1/MCM5/EZH2/ORC1/FEN1/MCM7/DNA2/CHEK2/CDK2/DCLRE1B/MSH2/PRKDC/POLD1/PPP1CC/XRCC3/CBX5/CBX3/WRAP53/XRCC5/RECQL4/DOT1L/PARP1/KDM1A/APEX1/THOC3/ORC2	35
CC	GO:0000794	condensed nuclear chromosome	28/782	99/19717	8.80222e-17	3.32453e-15	2.4803e-15	BUB1/NCAPH/BUB1B/NDC80/CCNB1/NUF2/CENPK/BLM/PLK1/BRCA2/RAD51/NCAPD2/AURKA/AURKB/BRCA1/DSN1/CHEK1/CENPA/CENPO/NEK2/TOPBP1/INCENP/RCC1/NCAPD3/SMC1A/SMC3/SUV39H1/UBE2I	28
CC	GO:0043596	nuclear replication fork	19/782	41/19717	2.03018e-16	7.12013e-15	5.31205e-15	MCM10/CDC45/PCNA/TIMELESS/GINS2/MCM3/MMS22L/WDHD1/POLA2/PRIM1/POLA1/PRIM2/POLD1/POLD2/ZRANB3/TIPIN/GINS4/SMARCAD1/POLD3	19
CC	GO:0030496	midbody	34/782	173/19717	7.61837e-15	2.49375e-13	1.86049e-13	KIF20A/ASPM/KIF14/KIF23/CENPF/ANLN/KIF4A/CDK1/ECT2/RACGAP1/CEP55/PLK1/CENPE/PRC1/BIRC5/AURKA/AURKB/SPAG5/SHCBP1/KIF20B/CDCA8/NEK2/INCENP/DDX11/CIT/PPP1CC/USP3/NUP62/PSRC1/RCC2/AGBL5/URB2/RAN/HNRNPU	34
CC	GO:0000790	nuclear chromatin	51/782	376/19717	1.41531e-14	4.34323e-13	3.24031e-13	ESCO2/RAD51/RAD51AP1/TIMELESS/UHRF1/HMGB2/CENPA/CDCA5/E2F1/EME1/EZH2/ASF1B/CHAF1A/CHAF1B/HMGB3/MSH6/TAF5/ACTL6A/RBMX/RCC1/NCAPD3/NASP/TRIM28/DDX11/HDAC2/ANP32E/DHX9/USP3/RUVBL1/CBX5/CBX3/SSRP1/SMARCC1/BAZ1A/TIPIN/TTI1/BEND3/EHMT2/HMGXB4/TRIM24/SUZ12/MTA1/HMGB1/KDM1A/SMARCD1/CPSF6/SMARCA4/RUVBL2/TCF3/DNMT3A/CBX7	51
CC	GO:0034399	nuclear periphery	28/782	131/19717	2.05572e-13	5.93742e-12	4.42967e-12	CENPF/KIF4A/BLM/PCNA/LMNB1/UHRF1/MYB/POLA1/SRPK1/NUP107/SMC1A/NUP205/LMNB2/NONO/NUP35/RUVBL1/SMC3/SUV39H1/CAD/YEATS4/NUP93/PHB2/SMARCAD1/PAXIP1/ERCC8/RUVBL2/HNRNPU/DNMT3A	28
CC	GO:0000784	nuclear chromosome, telomeric region	27/782	123/19717	2.79954e-13	7.63653e-12	5.69732e-12	CDK1/BRCA2/RAD51/PCNA/MCM6/MCM3/MCM2/MCM4/MCM5/ORC1/FEN1/MCM7/DNA2/DCLRE1B/MSH2/PRKDC/POLD1/PPP1CC/XRCC3/CBX5/CBX3/XRCC5/PARP1/KDM1A/APEX1/THOC3/ORC2	27
CC	GO:0005876	spindle microtubule	19/782	59/19717	5.91076e-13	1.52747e-11	1.13958e-11	KIF11/KIF4A/SKA3/NUSAP1/CDK1/KIF18A/PLK1/CENPE/PRC1/BIRC5/SKA1/AURKA/AURKB/KNTC1/KIF18B/PSRC1/SKA2/HNRNPU/FAM161A	19
CC	GO:0005875	microtubule associated complex	28/782	152/19717	9.48789e-12	2.28842e-10	1.7073e-10	KIF20A/KIF14/KIF23/KIF11/KIF4A/KIF18A/KIF2C/KIFC1/KIF15/CENPE/BIRC5/AURKA/AURKB/KIF20B/CDCA8/KIF22/KIF24/KIF18B/HAUS8/HAUS6/HAUS1/NDE1/HAUS3/HAUS5/HAUS7/EML2/DYNC1I1/MAP1A	28
CC	GO:0000792	heterochromatin	20/782	76/19717	9.78756e-12	2.28842e-10	1.7073e-10	ESCO2/UHRF1/CENPA/HELLS/EME1/WDR76/DNMT1/INCENP/NCAPD3/RRP1B/TRIM28/CBX5/CBX3/BEND3/CBX2/SUV39H1/SUZ12/SMARCAD1/ORC2/DNMT3A	20
CC	GO:0051233	spindle midzone	14/782	34/19717	1.41395e-11	3.15567e-10	2.35432e-10	KIF14/KIF18A/RACGAP1/PLK1/CENPE/AURKA/AURKB/CDC6/KIF20B/CDCA8/KIF18B/CENPV/RCC2/HNRNPU	14
CC	GO:0000778	condensed nuclear chromosome kinetochore	10/782	15/19717	2.28251e-11	4.87266e-10	3.6353e-10	BUB1/BUB1B/NDC80/CCNB1/NUF2/CENPK/PLK1/DSN1/CENPA/CENPO	10
CC	GO:0005814	centriole	26/782	139/19717	3.65835e-11	7.48438e-10	5.5838e-10	PLK4/TOP2A/CEP55/PLK1/AURKA/STIL/KIF24/POC1A/WDR62/CEP152/CENPJ/CCNF/CEP135/CEP78/SASS6/MPHOSPH9/RTTN/SCLT1/NEDD1/CNTLN/CEP192/ALMS1/CEP76/RAN/TUBD1/HAP1	26
CC	GO:0000780	condensed nuclear chromosome, centromeric region	12/782	26/19717	8.06833e-11	1.58462e-09	1.18222e-09	BUB1/BUB1B/NDC80/CCNB1/NUF2/CENPK/PLK1/AURKA/AURKB/DSN1/CENPA/CENPO	12
CC	GO:0042575	DNA polymerase complex	11/782	21/19717	8.74011e-11	1.65054e-09	1.2314e-09	MCM3/POLE2/POLE/POLA2/PRIM1/DNA2/POLA1/PRIM2/POLD1/POLD2/POLD3	11
CC	GO:0000940	condensed chromosome outer kinetochore	9/782	14/19717	3.88595e-10	7.06666e-09	5.27216e-09	BUB1/CENPF/BUB1B/SKA3/NDC80/CCNB1/PLK1/SKA1/SKA2	9
CC	GO:0016363	nuclear matrix	21/782	109/19717	1.59164e-09	2.79105e-08	2.08229e-08	CENPF/KIF4A/BLM/LMNB1/UHRF1/MYB/POLA1/SRPK1/SMC1A/NONO/RUVBL1/SMC3/CAD/YEATS4/PHB2/SMARCAD1/PAXIP1/ERCC8/RUVBL2/HNRNPU/DNMT3A	21
CC	GO:0005871	kinesin complex	15/782	55/19717	2.23968e-09	3.79201e-08	2.82907e-08	KIF20A/KIF14/KIF23/KIF11/KIF4A/KIF18A/KIF2C/KIFC1/KIF15/CENPE/KIF20B/KIF22/KIF24/KIF18B/NDE1	15
CC	GO:0042555	MCM complex	8/782	12/19717	2.54017e-09	4.15741e-08	3.10168e-08	MCM6/MCM3/MCM2/MCM4/MMS22L/MCM5/MCM8/MCM7	8
CC	GO:0018995	host cellular component	17/782	73/19717	2.75301e-09	4.22414e-08	3.15147e-08	TOP2A/NUP107/NUP188/NUP205/NUP155/NUP37/NUP35/NUP62/KPNA2/NUP88/XPO1/NUP50/NUP160/NUP210/NUP93/AAAS/RAN	17
CC	GO:0043657	host cell	17/782	73/19717	2.75301e-09	4.22414e-08	3.15147e-08	TOP2A/NUP107/NUP188/NUP205/NUP155/NUP37/NUP35/NUP62/KPNA2/NUP88/XPO1/NUP50/NUP160/NUP210/NUP93/AAAS/RAN	17
CC	GO:0005635	nuclear envelope	46/782	464/19717	1.16559e-08	1.73425e-07	1.29386e-07	CENPF/DTL/BRIP1/LMNB1/MAD2L1/TMPO/POLA1/NUP107/RRM1/CSE1L/RCC1/TMEM97/NUP188/LBR/SEPHS1/NUP205/LMNB2/IPO5/CDK4/NUP155/RBM15/NUP37/NUP35/CBX5/CBX3/NUP62/RANBP1/SENP1/NUP88/SYNE2/XPO1/NUP50/MTA1/NUP160/PARP1/NUP210/YEATS4/NUP93/AAAS/RAN/ZNF354C/RBM15B/QSOX2/CREB3L4/UBE2I/P2RX6	46
CC	GO:0030894	replisome	10/782	26/19717	2.71229e-08	3.91686e-07	2.92222e-07	PCNA/MCM3/POLA2/PRIM1/POLA1/PRIM2/POLD1/POLD2/DONSON/POLD3	10
CC	GO:0005720	nuclear heterochromatin	11/782	33/19717	3.09873e-08	4.34707e-07	3.24318e-07	ESCO2/UHRF1/CENPA/EME1/NCAPD3/TRIM28/CBX5/CBX3/BEND3/SUZ12/DNMT3A	11
CC	GO:0000307	cyclin-dependent protein kinase holoenzyme complex	12/782	42/19717	5.14476e-08	7.01688e-07	5.23502e-07	CCNB2/CCNA2/CCNB1/CDK1/PCNA/CKS1B/CKS2/CCNF/CDK2/CCNE2/CCNJ/CDK4	12
CC	GO:0005643	nuclear pore	17/782	89/19717	6.51414e-08	8.64444e-07	6.44927e-07	MAD2L1/NUP107/NUP188/NUP205/IPO5/NUP155/NUP37/NUP35/NUP62/RANBP1/NUP88/NUP50/NUP160/NUP210/NUP93/AAAS/RAN	17
CC	GO:1990023	mitotic spindle midzone	7/782	13/19717	2.09285e-07	2.70418e-06	2.01748e-06	KIF18A/CENPE/AURKB/KIF20B/KIF18B/RCC2/HNRNPU	7
CC	GO:0005721	pericentric heterochromatin	8/782	20/19717	4.86931e-07	6.13033e-06	4.5736e-06	ESCO2/CENPA/HELLS/DNMT1/INCENP/NCAPD3/CBX5/CBX3	8
CC	GO:0097431	mitotic spindle pole	9/782	27/19717	5.71178e-07	7.01121e-06	5.23079e-06	ASPM/FAM83D/AURKA/SPAG5/KIF20B/CDK5RAP2/SMC1A/SMC3/FAM161A	9
CC	GO:0090734	site of DNA damage	14/782	73/19717	8.92153e-07	1.06841e-05	7.97097e-06	ESCO2/RAD51/TIMELESS/WDR76/RFWD3/RAD18/RBBP8/POLH/CBX5/CBX3/WRAP53/XRCC5/PARP1/SMARCAD1	14
CC	GO:0071013	catalytic step 2 spliceosome	15/782	87/19717	1.51979e-06	1.7767e-05	1.32553e-05	RBMX/SNRPB/HNRNPA1/SNRNP200/HNRNPA3/SRSF1/SYNCRIP/SNRPF/HNRNPR/MAGOHB/SNRPD1/DHX35/SF3B3/SNRPE/HNRNPU	15
CC	GO:0034708	methyltransferase complex	17/782	113/19717	2.23307e-06	2.54985e-05	1.90234e-05	EZH2/SNRPB/RBM15/HDAC2/RUVBL1/CBX5/PHF19/TEX10/SNRPF/PRMT1/SNRPD1/SUZ12/PAXIP1/WDR4/RUVBL2/SNRPE/RBM15B	17
CC	GO:0043601	nuclear replisome	8/782	24/19717	2.46831e-06	2.75441e-05	2.05496e-05	MCM3/POLA2/PRIM1/POLA1/PRIM2/POLD1/POLD2/POLD3	8
CC	GO:1904949	ATPase complex	14/782	80/19717	2.81435e-06	3.07077e-05	2.29098e-05	RFC4/ATAD5/ACTL6A/HDAC2/ANP32E/RUVBL1/SMARCC1/BAZ1A/HMGXB4/SUZ12/MTA1/SMARCD1/SMARCA4/RUVBL2	14
CC	GO:0005681	spliceosomal complex	22/782	185/19717	4.44861e-06	4.74841e-05	3.5426e-05	TTF2/SNRPA/RBMX/SNRPB/HNRNPA1/SNRNP200/HNRNPA3/SRSF2/LSM5/U2AF2/SRSF1/SYNCRIP/SNRPF/HNRNPR/MAGOHB/SNRPD1/DHX35/DHX15/USP39/SF3B3/SNRPE/HNRNPU	22
CC	GO:0061695	transferase complex, transferring phosphorus-containing groups	27/782	259/19717	4.88002e-06	5.09806e-05	3.80346e-05	CCNB2/CCNA2/CCNB1/CDK1/PCNA/MCM3/POLE2/POLE/POLA2/PRIM1/DNA2/CKS1B/POLA1/CKS2/PRIM2/CCNF/CDK2/TAF5/CCNE2/CCNJ/POLD1/CDK4/POLD2/POLR2D/POLR1A/POLR1E/POLD3	27
CC	GO:0000800	lateral element	6/782	13/19717	5.15889e-06	5.27712e-05	3.93705e-05	BLM/BRCA2/RAD51/BRCA1/INCENP/SMC3	6
CC	GO:0000152	nuclear ubiquitin ligase complex	10/782	43/19717	5.30786e-06	5.31869e-05	3.96806e-05	BUB1B/UBE2C/CDC20/BRCA1/BARD1/UBE2S/CBX2/BCOR/ANAPC1/CBX7	10
CC	GO:0010369	chromocenter	6/782	14/19717	8.7249e-06	8.56785e-05	6.39214e-05	ESCO2/OIP5/AURKB/CDCA8/INCENP/CBX5	6
CC	GO:0000791	euchromatin	9/782	38/19717	1.34222e-05	0.000129222	9.64073e-05	UHRF1/RBMX/RRP1B/TRIM28/CBX3/CBX2/TRIM24/RUVBL2/DNMT3A	9
CC	GO:0031965	nuclear membrane	28/782	296/19717	2.04446e-05	0.000193044	0.000144023	DTL/BRIP1/LMNB1/NUP107/RCC1/TMEM97/LBR/SEPHS1/NUP205/LMNB2/CDK4/NUP155/RBM15/NUP35/CBX3/NUP62/SENP1/SYNE2/XPO1/NUP50/NUP210/YEATS4/NUP93/AAAS/ZNF354C/QSOX2/CREB3L4/P2RX6	28
CC	GO:1990391	DNA repair complex	9/782	42/19717	3.18489e-05	0.000295053	0.000220128	MSH6/MSH2/PRKDC/POLD1/XRCC5/MSH5/KDM1A/NHEJ1/ERCC8	9
CC	GO:0005652	nuclear lamina	5/782	11/19717	3.66693e-05	0.000333419	0.000248751	PCNA/LMNB1/LMNB2/NUP35/SUV39H1	5
CC	GO:0070603	SWI/SNF superfamily-type complex	12/782	76/19717	4.1892e-05	0.000373981	0.000279013	ACTL6A/HDAC2/ANP32E/RUVBL1/SMARCC1/BAZ1A/HMGXB4/SUZ12/MTA1/SMARCD1/SMARCA4/RUVBL2	12
CC	GO:0032993	protein-DNA complex	21/782	202/19717	5.6062e-05	0.000491544	0.000366721	CDC45/GINS1/PCNA/GINS2/MCM3/CENPA/POLA2/PRIM1/POLA1/PRIM2/PRKDC/POLD1/POLD2/NFYA/GINS4/XRCC5/SUZ12/PARP1/NPM1/DONSON/POLD3	21
CC	GO:0034709	methylosome	5/782	12/19717	6.08085e-05	0.000523807	0.000390792	SNRPB/SNRPF/PRMT1/SNRPD1/SNRPE	5
CC	GO:0032153	cell division site	11/782	68/19717	6.92081e-05	0.000585882	0.000437104	KIF20A/ANLN/ECT2/PLK4/RACGAP1/CEP55/MASTL/CIT/PPP1CC/NDE1/TUBGCP4	11
CC	GO:0035861	site of double-strand break	10/782	58/19717	8.44009e-05	0.000702387	0.000524023	ESCO2/RAD51/TIMELESS/RFWD3/RAD18/RBBP8/POLH/WRAP53/PARP1/SMARCAD1	10
CC	GO:0043240	Fanconi anaemia nuclear complex	5/782	13/19717	9.55896e-05	0.000782241	0.000583599	FANCA/FANCB/FANCG/FANCM/FANCC	5
CC	GO:0000930	gamma-tubulin complex	6/782	21/19717	0.000124219	0.000983734	0.000733925	BRCA1/CENPJ/CDK5RAP2/MZT1/TUBGCP4/CKAP5	6
CC	GO:0005697	telomerase holoenzyme complex	6/782	21/19717	0.000124219	0.000983734	0.000733925	SNRPB/WRAP53/DKC1/NVL/SNRPE/HNRNPU	6
CC	GO:0000803	sex chromosome	7/782	30/19717	0.000137558	0.00107208	0.000799839	ESCO2/PLK4/CDK2/SMARCC1/SUZ12/HNRNPU/DNMT3A	7
CC	GO:0000795	synaptonemal complex	8/782	40/19717	0.000147057	0.00111085	0.000828758	BLM/PLK1/BRCA2/RAD51/BRCA1/INCENP/SMC3/UBE2I	8
CC	GO:0099086	synaptonemal structure	8/782	40/19717	0.000147057	0.00111085	0.000828758	BLM/PLK1/BRCA2/RAD51/BRCA1/INCENP/SMC3/UBE2I	8
CC	GO:1902554	serine/threonine protein kinase complex	12/782	88/19717	0.000179679	0.0013367	0.000997261	CCNB2/CCNA2/CCNB1/CDK1/PCNA/CKS1B/CKS2/CCNF/CDK2/CCNE2/CCNJ/CDK4	12
CC	GO:0031616	spindle pole centrosome	5/782	15/19717	0.000208745	0.00152976	0.00114129	DLGAP5/AURKA/AURKB/NDE1/NPM1	5
CC	GO:0032154	cleavage furrow	9/782	55/19717	0.000286594	0.00206938	0.00154388	KIF20A/ECT2/PLK4/RACGAP1/CEP55/MASTL/CIT/PPP1CC/NDE1	9
CC	GO:0045171	intercellular bridge	9/782	59/19717	0.000491827	0.00349981	0.00261107	TPX2/KIF20A/KIF23/KIF4A/CEP55/CDCA8/CDC7/HAUS3/AGBL5	9
CC	GO:0034719	SMN-Sm protein complex	5/782	18/19717	0.000539376	0.00378334	0.0028226	SNRPB/SNRPF/SNRPD1/GEMIN4/SNRPE	5
CC	GO:0005689	U12-type spliceosomal complex	6/782	27/19717	0.000552953	0.00382394	0.00285289	SNRPB/SNRPF/SNRPD1/DHX15/SF3B3/SNRPE	6
CC	GO:0005832	chaperonin-containing T-complex	4/782	11/19717	0.000648092	0.00441963	0.00329731	CCT7/CCT2/CCT5/CCT3	4
CC	GO:0090543	Flemming body	6/782	28/19717	0.000680376	0.00457623	0.00341414	KIF14/KIF23/RACGAP1/CEP55/USP3/NUP62	6
CC	GO:0071005	U2-type precatalytic spliceosome	8/782	50/19717	0.000723978	0.0048037	0.00358385	SNRPB/SNRNP200/LSM5/SNRPF/MAGOHB/SNRPD1/SF3B3/SNRPE	8
CC	GO:0071011	precatalytic spliceosome	8/782	51/19717	0.000829286	0.00535827	0.0039976	SNRPB/SNRNP200/LSM5/SNRPF/MAGOHB/SNRPD1/SF3B3/SNRPE	8
CC	GO:1990752	microtubule end	6/782	29/19717	0.000829386	0.00535827	0.0039976	ASPM/KIF2C/SPAG5/KIF18B/CDK5RAP2/CKAP5	6
CC	GO:0015030	Cajal body	10/782	77/19717	0.000902147	0.005752	0.00429134	OIP5/CDK2/ZNF473/WRAP53/DKC1/XPO1/RDM1/SCARNA22/FBL/ZC3H8	10
CC	GO:0035371	microtubule plus-end	5/782	20/19717	0.00091376	0.005752	0.00429134	KIF2C/SPAG5/KIF18B/CDK5RAP2/CKAP5	5
CC	GO:0071564	npBAF complex	4/782	12/19717	0.000941734	0.00585306	0.00436674	ACTL6A/SMARCC1/SMARCD1/SMARCA4	4
CC	GO:0005680	anaphase-promoting complex	5/782	21/19717	0.00116049	0.00712252	0.00531383	BUB1B/UBE2C/CDC20/UBE2S/ANAPC1	5
CC	GO:0046540	U4/U6 x U5 tri-snRNP complex	7/782	42/19717	0.00120598	0.00722119	0.00538745	SNRPB/SNRNP200/LSM5/SNRPF/SNRPD1/USP39/SNRPE	7
CC	GO:0097526	spliceosomal tri-snRNP complex	7/782	42/19717	0.00120598	0.00722119	0.00538745	SNRPB/SNRNP200/LSM5/SNRPF/SNRPD1/USP39/SNRPE	7
CC	GO:1902911	protein kinase complex	12/782	109/19717	0.00128738	0.00761222	0.00567918	CCNB2/CCNA2/CCNB1/CDK1/PCNA/CKS1B/CKS2/CCNF/CDK2/CCNE2/CCNJ/CDK4	12
CC	GO:0001741	XY body	4/782	13/19717	0.0013178	0.00761222	0.00567918	ESCO2/PLK4/SMARCC1/DNMT3A	4
CC	GO:0005687	U4 snRNP	4/782	13/19717	0.0013178	0.00761222	0.00567918	SNRPB/SNRPF/SNRPD1/SNRPE	4
CC	GO:0016605	PML body	11/782	99/19717	0.00187545	0.0107075	0.00798845	BLM/RAD51/TOPBP1/RFWD3/CHEK2/TDG/CASP8AP2/CBX5/TOP3A/RDM1/UBE2I	11
CC	GO:0045120	pronucleus	4/782	15/19717	0.00236143	0.0131485	0.0098096	CENPF/CCNA2/AURKA/EZH2	4
CC	GO:0031519	PcG protein complex	7/782	47/19717	0.00236909	0.0131485	0.0098096	EZH2/SCML2/HDAC2/PHF19/CBX2/SUZ12/CBX7	7
CC	GO:0005667	transcription regulator complex	29/782	415/19717	0.00238334	0.0131485	0.0098096	DEPDC1/E2F8/E2F1/E2F7/E2F2/LIN9/RBL1/E2F3/CDK2/TAF5/RCOR2/TRIM28/HDGF/HNRNPAB/RBBP8/PRKDC/CDK4/NONO/HDAC2/CBX5/NFYA/GTF3C2/MTA1/PARP1/HMGB1/KDM1A/APEX1/TCF3/HNRNPU	29
CC	GO:0016607	nuclear speck	28/782	397/19717	0.00246213	0.0134323	0.0100213	OIP5/SMC4/CDC25C/NCAPG2/KIF22/E2F7/HAUS6/NONO/RBM15/PPP1CC/SRSF2/BARD1/U2AF2/SRSF1/POLR2D/EHMT2/SRSF3/DHX15/CPSF6/APEX1/RBM10/SRSF6/RBM15B/THOC3/SRSF9/TCF3/HNRNPU/SRSF7	28
CC	GO:0005684	U2-type spliceosomal complex	10/782	90/19717	0.00297041	0.0160272	0.0119572	SNRPB/SNRNP200/LSM5/U2AF2/SNRPF/MAGOHB/SNRPD1/DHX15/SF3B3/SNRPE	10
CC	GO:0035098	ESC/E(Z) complex	4/782	16/19717	0.00305065	0.0162812	0.0121468	EZH2/HDAC2/PHF19/SUZ12	4
CC	GO:0017053	transcription repressor complex	9/782	77/19717	0.00335691	0.017723	0.0132224	DEPDC1/LIN9/RCOR2/HDGF/RBBP8/HDAC2/CBX5/MTA1/HMGB1	9
CC	GO:0035770	ribonucleoprotein granule	18/782	223/19717	0.00350359	0.0183007	0.0136534	MEX3A/G3BP1/HNRNPA3/DHX9/USP3/HNRNPL/BARD1/GABPB1/ELAVL1/CNOT1/POLR2D/RPL6/MEX3B/RPLP0/EDC3/RPS6/HNRNPU/DYNC1I1	18
CC	GO:0000176	nuclear exosome (RNase complex)	4/782	17/19717	0.00386543	0.0199782	0.0149049	EXOSC2/EXOSC8/EXOSC9/NVL	4
CC	GO:0031461	cullin-RING ubiquitin ligase complex	14/782	158/19717	0.00418396	0.0213992	0.0159651	BUB1B/DTL/UBE2C/CDC20/CKS1B/SKP2/CKS2/CCNF/UBE2S/DET1/ERCC8/ANAPC1/FBXW8/FBXO2	14
CC	GO:0016514	SWI/SNF complex	4/782	19/19717	0.00591106	0.0297239	0.0221759	ACTL6A/SMARCC1/SMARCD1/SMARCA4	4
CC	GO:0031080	nuclear pore outer ring	3/782	10/19717	0.00605036	0.0297239	0.0221759	NUP107/NUP37/NUP160	3
CC	GO:0070938	contractile ring	3/782	10/19717	0.00605036	0.0297239	0.0221759	ANLN/PRC1/KIF20B	3
CC	GO:0005719	nuclear euchromatin	5/782	30/19717	0.00605375	0.0297239	0.0221759	RBMX/TRIM28/CBX3/TRIM24/RUVBL2	5
CC	GO:0000118	histone deacetylase complex	8/782	70/19717	0.0063685	0.0309597	0.0230978	HDAC2/ANP32E/RUVBL1/CBX5/SAP30/MTA1/RUVBL2/HDAC11	8
CC	GO:0035097	histone methyltransferase complex	9/782	86/19717	0.00699223	0.0336587	0.0251114	EZH2/HDAC2/RUVBL1/CBX5/PHF19/TEX10/SUZ12/PAXIP1/RUVBL2	9
CC	GO:0035267	NuA4 histone acetyltransferase complex	4/782	20/19717	0.00716038	0.0338053	0.0252208	ACTL6A/RUVBL1/YEATS4/RUVBL2	4
CC	GO:0043189	H4/H2A histone acetyltransferase complex	4/782	20/19717	0.00716038	0.0338053	0.0252208	ACTL6A/RUVBL1/YEATS4/RUVBL2	4
CC	GO:0000235	astral microtubule	3/782	11/19717	0.00807621	0.03706	0.027649	KIF18A/KIF18B/FAM161A	3
CC	GO:0005818	aster	3/782	11/19717	0.00807621	0.03706	0.027649	KIF18A/KIF18B/FAM161A	3
CC	GO:0072687	meiotic spindle	3/782	11/19717	0.00807621	0.03706	0.027649	ASPM/FBXO5/AURKA	3
CC	GO:0000242	pericentriolar material	4/782	21/19717	0.00857212	0.0389714	0.029075	CEP152/CDK5RAP2/NEDD1/CEP192	4
CC	GO:0000151	ubiquitin ligase complex	20/782	282/19717	0.00901483	0.0406081	0.0302961	BUB1B/DTL/UBE2C/CDC20/BRCA1/CKS1B/SKP2/CKS2/CCNF/RAD18/BARD1/UBE2S/CBX2/DET1/BCOR/ERCC8/ANAPC1/FBXW8/FBXO2/CBX7	20
CC	GO:0005682	U5 snRNP	4/782	22/19717	0.0101541	0.0449158	0.0335099	SNRPB/SNRNP200/SNRPD1/SNRPE	4
CC	GO:0101031	chaperone complex	4/782	22/19717	0.0101541	0.0449158	0.0335099	CCT7/CCT2/CCT5/CCT3	4
CC	GO:0000812	Swr1 complex	3/782	12/19717	0.0104544	0.0454256	0.0338903	ANP32E/RUVBL1/RUVBL2	3
CC	GO:0031464	Cul4A-RING E3 ubiquitin ligase complex	3/782	12/19717	0.0104544	0.0454256	0.0338903	DTL/DET1/ERCC8	3
CC	GO:0036464	cytoplasmic ribonucleoprotein granule	16/782	212/19717	0.0105993	0.0456516	0.0340588	MEX3A/G3BP1/DHX9/USP3/BARD1/GABPB1/ELAVL1/CNOT1/POLR2D/RPL6/MEX3B/RPLP0/EDC3/RPS6/HNRNPU/DYNC1I1	16
CC	GO:0000178	exosome (RNase complex)	4/782	24/19717	0.0138569	0.0591628	0.044139	EXOSC2/EXOSC8/EXOSC9/NVL	4
CC	GO:0005685	U1 snRNP	5/782	37/19717	0.0147569	0.0619286	0.0462025	SNRPA/SNRPB/SNRPF/SNRPD1/SNRPE	5
CC	GO:1905348	endonuclease complex	5/782	37/19717	0.0147569	0.0619286	0.0462025	EME1/DHX9/POP1/DGCR8/RAD51C	5
CC	GO:0016234	inclusion body	8/782	82/19717	0.0159339	0.0654262	0.0488119	RAD18/POLD1/XRN2/SYNE2/URB2/HOXD3/CLU/HAP1	8
CC	GO:0097346	INO80-type complex	4/782	25/19717	0.0159901	0.0654262	0.0488119	ACTL6A/ANP32E/RUVBL1/RUVBL2	4
CC	GO:1905354	exoribonuclease complex	4/782	25/19717	0.0159901	0.0654262	0.0488119	EXOSC2/EXOSC8/EXOSC9/NVL	4
CC	GO:0000177	cytoplasmic exosome (RNase complex)	3/782	14/19717	0.0163066	0.0656274	0.048962	EXOSC2/EXOSC8/EXOSC9	3
CC	GO:0032300	mismatch repair complex	3/782	14/19717	0.0163066	0.0656274	0.048962	MSH6/MSH2/MSH5	3
MF	GO:0140097	catalytic activity, acting on DNA	67/764	213/17696	1.45343e-39	9.86882e-37	8.33813e-37	EXO1/NEIL3/TOP2A/BRIP1/BLM/RAD51/CDC45/POLQ/GINS1/PCNA/ERCC6L/MCM6/GINS2/MCM3/POLE2/DSCC1/RFC4/MCM2/MCM4/RAD54L/MCM5/MCM8/POLE/POLA2/RFC3/EME1/RFC5/FEN1/RAD54B/MCM7/DNA2/GEN1/POLA1/DNMT1/LIG1/RAD18/DCLRE1B/UNG/RBBP8/POLH/RFC2/TDP1/DDX11/POLD1/G3BP1/TDG/XRCC3/POLD2/DHX9/RUVBL1/ZRANB3/TOP3A/GINS4/DKC1/XRCC5/RECQL4/TOP3B/SMARCAD1/RAD51C/APEX1/LIG3/ALKBH2/ENDOG/POLD3/RUVBL2/ERI2/DNMT3A	67
MF	GO:0008094	DNA-dependent ATPase activity	43/764	113/17696	1.15532e-29	3.9223e-27	3.31394e-27	TOP2A/BRIP1/BLM/RAD51/CDC45/POLQ/GINS1/ERCC6L/MCM6/GINS2/MCM3/DSCC1/XRCC2/RFC4/MCM2/MCM4/RAD54L/MCM5/MCM8/RFC3/RFC5/TTF2/RAD54B/MCM7/DNA2/MSH6/RAD18/MSH2/RFC2/DDX11/G3BP1/XRCC3/DHX9/RUVBL1/ZRANB3/GINS4/XRCC5/RECQL4/MSH5/SMARCA4/SMARCAD1/RAD51C/RUVBL2	43
MF	GO:0016887	ATPase activity	74/764	434/17696	1.13744e-24	2.5744e-22	2.1751e-22	KIF20A/KIF14/KIF23/KIF11/KIF4A/KIF18A/TOP2A/KIF2C/KIFC1/ATAD2/BRIP1/BLM/KIF15/CENPE/RAD51/CDC45/POLQ/GINS1/ERCC6L/MCM6/GINS2/MCM3/DSCC1/XRCC2/RFC4/MCM2/MCM4/RAD54L/MCM5/KIF20B/MCM8/HELLS/RFC3/KIF22/RFC5/ATAD5/KIF24/KIF18B/TTF2/RAD54B/MCM7/DNA2/MSH6/RAD18/FANCM/FIGNL1/MSH2/RFC2/DDX11/SPATA5/G3BP1/XRCC3/SNRNP200/DHX9/RUVBL1/ZRANB3/DHX33/GINS4/XRCC5/RECQL4/DHX35/MSH5/DHX15/NVL/SMARCA4/SMARCAD1/RAD51…	74
MF	GO:0003678	DNA helicase activity	33/764	81/17696	3.51802e-24	5.97183e-22	5.04557e-22	BRIP1/BLM/RAD51/CDC45/POLQ/GINS1/ERCC6L/MCM6/GINS2/MCM3/DSCC1/RFC4/MCM2/MCM4/MCM5/MCM8/RFC3/RFC5/RAD54B/MCM7/DNA2/RAD18/RFC2/DDX11/G3BP1/DHX9/RUVBL1/ZRANB3/GINS4/XRCC5/RECQL4/SMARCAD1/RUVBL2	33
MF	GO:0004386	helicase activity	43/764	163/17696	2.40957e-22	3.2722e-20	2.76467e-20	BRIP1/BLM/RAD51/CDC45/POLQ/GINS1/ERCC6L/MCM6/GINS2/MCM3/DSCC1/RFC4/MCM2/MCM4/RAD54L/MCM5/MCM8/HELLS/RFC3/RFC5/TTF2/RAD54B/MCM7/DNA2/RAD18/FANCM/RFC2/DDX11/G3BP1/SNRNP200/DHX9/RUVBL1/ZRANB3/DHX33/GINS4/XRCC5/RECQL4/DHX35/DHX15/SMARCA4/SMARCAD1/RUVBL2/DDX55	43
MF	GO:0003697	single-stranded DNA binding	32/764	113/17696	5.95406e-18	6.73801e-16	5.69292e-16	NEIL3/MCM10/BLM/BRCA2/RAD51/CDC45/RAD51AP1/MCM6/MCM3/SMC4/MCM2/HMGB2/MCM4/MCM5/MCM8/PRIM1/SMC2/MCM7/POLA1/RAD18/MSH2/RBBP8/TDP1/DDX11/HNRNPA1/DHX9/NUP35/TOP3A/PCBP2/POLR2D/HMGB1/HNRNPU	32
MF	GO:0003688	DNA replication origin binding	16/764	24/17696	6.65572e-17	6.45605e-15	5.45469e-15	MCM10/CDC45/MCM6/MCM3/CDC6/MCM2/ORC6/MCM4/MCM5/MCM8/ORC1/MCM7/POLA1/DDX11/DHX9/ORC2	16
MF	GO:0017116	single-stranded DNA helicase activity	14/764	20/17696	2.1204e-15	1.79969e-13	1.52055e-13	RAD51/POLQ/MCM6/DSCC1/RFC4/MCM2/MCM5/RFC3/RFC5/MCM7/DNA2/RAD18/RFC2/DHX9	14
MF	GO:0015631	tubulin binding	49/764	336/17696	6.34582e-14	4.78757e-12	4.045e-12	KIF20A/KIF14/KIF23/KIF11/KIF4A/NUSAP1/KIF18A/RACGAP1/KIF2C/KIFC1/PLK1/BRCA2/FAM83D/KIF15/CENPE/PRC1/BIRC5/SKA1/BRCA1/SPAG5/KIF20B/KIF22/KIF24/KIF18B/CENPJ/CDK5RAP2/PSRC1/RCC2/SMC3/STRBP/NDE1/PHF6/TIAM1/TTLL4/SKA2/AGBL5/ADNP/CCT5/HAUS7/GAS2L3/TUBGCP4/FAM161A/CKAP5/TPPP3/EML2/GABARAPL1/DYNC1I1/CRYAB/MAP1A	49
MF	GO:0000217	DNA secondary structure binding	14/764	24/17696	9.12997e-14	6.19925e-12	5.23772e-12	NEIL3/BLM/XRCC2/HMGB2/GEN1/HMGB3/MSH6/RAD18/MSH2/RBBP8/XRCC3/RECQL4/HMGB1/RAD51C	14
MF	GO:0003684	damaged DNA binding	21/764	65/17696	1.68164e-13	1.03803e-11	8.77026e-12	NEIL3/BLM/POLQ/PCNA/BRCA1/HMGB2/FEN1/FANCG/MSH6/RAD18/DCLRE1B/MSH2/UNG/RBBP8/POLH/POLD1/TDG/XRCC5/RECQL4/HMGB1/APEX1	21
MF	GO:0042393	histone binding	35/764	197/17696	8.2067e-13	4.64362e-11	3.92338e-11	HJURP/ATAD2/NCAPD2/UHRF1/MCM2/NCAPG2/ASF1B/VRK1/CKS1B/CKS2/CHAF1B/DEK/MSH6/RCC1/NCAPD3/NASP/ANP32B/ANP32E/USP3/SET/PTMA/CBX5/WRAP53/SSRP1/SMARCC1/PHF19/USP49/CBX2/PHF6/TRIM24/ANP32A/SUZ12/NPM1/SMARCA4/NAP1L2	35
MF	GO:0008017	microtubule binding	38/764	246/17696	7.49164e-12	3.91294e-10	3.30603e-10	KIF20A/KIF14/KIF23/KIF11/KIF4A/NUSAP1/KIF18A/RACGAP1/KIF2C/KIFC1/PLK1/FAM83D/KIF15/CENPE/PRC1/BIRC5/SKA1/SPAG5/KIF20B/KIF22/KIF24/KIF18B/CDK5RAP2/PSRC1/RCC2/STRBP/NDE1/TIAM1/SKA2/HAUS7/GAS2L3/TUBGCP4/FAM161A/CKAP5/EML2/DYNC1I1/CRYAB/MAP1A	38
MF	GO:0043138	3'-5' DNA helicase activity	11/764	20/17696	1.06435e-10	5.1621e-09	4.36144e-09	BLM/CDC45/GINS1/MCM6/GINS2/MCM2/MCM5/MCM7/DHX9/GINS4/RECQL4	11
MF	GO:0000400	four-way junction DNA binding	10/764	16/17696	1.34338e-10	6.08104e-09	5.13784e-09	BLM/XRCC2/HMGB2/GEN1/HMGB3/MSH6/MSH2/XRCC3/HMGB1/RAD51C	10
MF	GO:0004518	nuclease activity	31/764	205/17696	1.10774e-09	4.70097e-08	3.97183e-08	EXO1/RNASEH2A/POLE/EME1/FEN1/DNA2/GEN1/FANCM/DCLRE1B/RBBP8/TDP1/EXOSC2/POLD1/G3BP1/XRCC3/ZRANB3/POP1/XRN2/DGCR8/EXOSC9/CNOT1/CPSF3/CNOT6/EDC3/RAD51C/APEX1/ENDOG/N4BP2/ERI2/RNASEH2B/ENDOD1	31
MF	GO:0004536	deoxyribonuclease activity	15/764	59/17696	1.99237e-08	7.95775e-07	6.72347e-07	EXO1/POLE/EME1/FEN1/DNA2/GEN1/DCLRE1B/RBBP8/POLD1/XRCC3/ZRANB3/RAD51C/APEX1/ENDOG/ERI2	15
MF	GO:0004527	exonuclease activity	16/764	81/17696	3.02629e-07	1.14158e-05	9.64518e-06	EXO1/POLE/FEN1/GEN1/DCLRE1B/TDP1/EXOSC2/POLD1/XRN2/EXOSC9/CNOT1/CPSF3/CNOT6/APEX1/ENDOG/ERI2	16
MF	GO:0003777	microtubule motor activity	16/764	84/17696	5.09822e-07	1.73611e-05	1.46683e-05	KIF20A/KIF14/KIF23/KIF11/KIF4A/KIF18A/KIF2C/KIFC1/KIF15/CENPE/KIF20B/KIF22/KIF24/KIF18B/SMC3/DYNC1I1	16
MF	GO:0004519	endonuclease activity	20/764	127/17696	5.11372e-07	1.73611e-05	1.46683e-05	EXO1/RNASEH2A/EME1/FEN1/DNA2/GEN1/RBBP8/G3BP1/XRCC3/ZRANB3/POP1/DGCR8/CPSF3/EDC3/RAD51C/APEX1/ENDOG/N4BP2/RNASEH2B/ENDOD1	20
MF	GO:0004529	exodeoxyribonuclease activity	9/764	25/17696	5.4464e-07	1.761e-05	1.48786e-05	EXO1/POLE/FEN1/GEN1/DCLRE1B/POLD1/APEX1/ENDOG/ERI2	9
MF	GO:0016796	exonuclease activity, active with either ribo- or deoxyribonucleic acids and producing 5'-phosphomonoesters	13/764	57/17696	6.88823e-07	2.12596e-05	1.79621e-05	EXO1/POLE/FEN1/GEN1/DCLRE1B/EXOSC2/POLD1/XRN2/EXOSC9/CNOT1/CNOT6/APEX1/ERI2	13
MF	GO:0004520	endodeoxyribonuclease activity	11/764	41/17696	8.71253e-07	2.57209e-05	2.17315e-05	EXO1/EME1/FEN1/DNA2/GEN1/RBBP8/XRCC3/ZRANB3/RAD51C/APEX1/ENDOG	11
MF	GO:0003887	DNA-directed DNA polymerase activity	9/764	27/17696	1.15588e-06	3.27017e-05	2.76295e-05	POLQ/POLE2/POLE/POLA2/POLA1/POLH/POLD1/POLD2/POLD3	9
MF	GO:0017056	structural constituent of nuclear pore	9/764	28/17696	1.6384e-06	4.44988e-05	3.75969e-05	NUP107/NUP188/NUP205/NUP155/NUP35/NUP62/NUP88/NUP160/NUP93	9
MF	GO:0016895	exodeoxyribonuclease activity, producing 5'-phosphomonoesters	8/764	23/17696	3.20216e-06	8.36257e-05	7.0655e-05	EXO1/POLE/FEN1/GEN1/DCLRE1B/POLD1/APEX1/ERI2	8
MF	GO:0034061	DNA polymerase activity	10/764	38/17696	3.33847e-06	8.39562e-05	7.09343e-05	POLQ/POLE2/POLE/POLA2/POLA1/POLH/POLD1/POLD2/DKC1/POLD3	10
MF	GO:0035173	histone kinase activity	7/764	17/17696	3.61943e-06	8.77711e-05	7.41574e-05	CCNB1/CDK1/AURKA/AURKB/CHEK1/VRK1/CDK2	7
MF	GO:1990841	promoter-specific chromatin binding	11/764	48/17696	4.72684e-06	0.000110673	9.35074e-05	EZH2/RBL1/DNMT1/TRIM28/HDAC2/DHX9/USP3/EHMT2/SUZ12/HNRNPU/SOX10	11
MF	GO:0140098	catalytic activity, acting on RNA	37/764	386/17696	5.09256e-06	0.000115262	9.7384e-05	EXO1/BRIP1/RNASEH2A/PRIM1/FEN1/RAD54B/PRIM2/FANCM/EXOSC2/G3BP1/DARS2/SNRNP200/DHX9/POP1/DHX33/XRN2/DGCR8/EXOSC9/MARS2/CNOT1/POLR2D/DHX35/CPSF3/DHX15/CNOT6/POLR1A/FBL/PTRH2/EDC3/POLR1E/APEX1/WDR4/ENDOG/DDX55/NOP2/ERI2/RNASEH2B	37
MF	GO:0070182	DNA polymerase binding	7/764	19/17696	8.69263e-06	0.000190397	0.000160865	FANCI/RAD51/PCNA/FANCD2/CDT1/HMGB1/SMARCA4	7
MF	GO:0016893	endonuclease activity, active with either ribo- or deoxyribonucleic acids and producing 5'-phosphomonoesters	10/764	46/17696	2.10506e-05	0.000446667	0.000377387	EXO1/RNASEH2A/FEN1/DNA2/GEN1/POP1/DGCR8/EDC3/APEX1/RNASEH2B	10
MF	GO:0004540	ribonuclease activity	16/764	114/17696	3.08003e-05	0.000633739	0.000535444	EXO1/RNASEH2A/FEN1/EXOSC2/POP1/XRN2/DGCR8/EXOSC9/CNOT1/CPSF3/CNOT6/EDC3/APEX1/ENDOG/ERI2/RNASEH2B	16
MF	GO:0008409	5'-3' exonuclease activity	6/764	17/17696	5.21969e-05	0.00101291	0.000855804	EXO1/FEN1/GEN1/DCLRE1B/XRN2/CPSF3	6
MF	GO:0031490	chromatin DNA binding	16/764	119/17696	5.25839e-05	0.00101291	0.000855804	CENPA/EZH2/ACTL6A/RCC1/CTCF/HDAC2/DHX9/SMARCC1/SUZ12/HMGN1/SMARCA4/APEX1/HMGN2/RUVBL2/HNRNPU/ZNF711	16
MF	GO:0004523	RNA-DNA hybrid ribonuclease activity	5/764	11/17696	5.50377e-05	0.00101291	0.000855804	EXO1/RNASEH2A/FEN1/APEX1/RNASEH2B	5
MF	GO:0003727	single-stranded RNA binding	14/764	95/17696	5.51954e-05	0.00101291	0.000855804	ILF3/RBMX/DDX11/HNRNPA1/DHX9/PTBP1/U2AF2/SYNCRIP/STRBP/POLR2D/RPS7/DAZAP1/MSI1/HNRNPU	14
MF	GO:0016891	endoribonuclease activity, producing 5'-phosphomonoesters	8/764	34/17696	7.77599e-05	0.00138945	0.00117394	EXO1/RNASEH2A/FEN1/POP1/DGCR8/EDC3/APEX1/RNASEH2B	8
MF	GO:0003714	transcription corepressor activity	24/764	238/17696	0.000104174	0.0018137	0.00153239	GMNN/E2F8/EZH2/E2F7/CENPJ/ZNF85/RCOR2/TRIM28/HDGF/RBBP8/CTCF/CASP8AP2/SRSF2/TCERG1/SAP30/MTA1/BCOR/SMARCA4/APEX1/RUVBL2/HNRNPU/DNMT3A/BEND6/BHLHE41	24
MF	GO:0003730	mRNA 3'-UTR binding	13/764	91/17696	0.000139621	0.00237007	0.00200246	IGF2BP3/ILF3/HNRNPA0/ELAVL1/EXOSC8/HNRNPD/HNRNPR/EXOSC9/RPS7/DAZAP1/CCT5/HNRNPU/SERBP1	13
MF	GO:0019104	DNA N-glycosylase activity	5/764	14/17696	0.000213992	0.00335938	0.00283832	NEIL3/PCNA/UNG/TDG/APEX1	5
MF	GO:0030983	mismatched DNA binding	5/764	14/17696	0.000213992	0.00335938	0.00283832	PCNA/MSH6/MSH2/TDG/MSH5	5
MF	GO:0016538	cyclin-dependent protein serine/threonine kinase regulator activity	9/764	49/17696	0.000216113	0.00335938	0.00283832	CCNB2/CCNA2/CCNB1/CKS1B/CKS2/CCNF/CCNE2/CCNJ/CDK4	9
MF	GO:0008536	Ran GTPase binding	8/764	39/17696	0.000217692	0.00335938	0.00283832	BIRC5/CSE1L/RCC1/IPO5/RANBP1/XPO1/XPO5/NUP50	8
MF	GO:0003774	motor activity	16/764	136/17696	0.000258774	0.00390462	0.00329899	KIF20A/KIF14/KIF23/KIF11/KIF4A/KIF18A/KIF2C/KIFC1/KIF15/CENPE/KIF20B/KIF22/KIF24/KIF18B/SMC3/DYNC1I1	16
MF	GO:0031491	nucleosome binding	12/764	85/17696	0.000279649	0.00406705	0.00343623	UHRF1/CENPA/VRK1/ACTL6A/RCC1/HDAC2/SSRP1/SMARCC1/PHF19/HMGN1/SMARCA4/HMGN2	12
MF	GO:0016779	nucleotidyltransferase activity	16/764	137/17696	0.000281519	0.00406705	0.00343623	POLQ/POLE2/POLE/POLA2/PRIM1/POLA1/PRIM2/POLH/POLD1/POLD2/DKC1/POLR2D/POLR1A/POLR1E/POLD3/NUDT5	16
MF	GO:0051539	4 iron, 4 sulfur cluster binding	8/764	41/17696	0.000313267	0.00443142	0.00374409	BRIP1/POLE/DNA2/POLA1/PRIM2/DDX11/POLD1/PPAT	8
MF	GO:0004521	endoribonuclease activity	10/764	64/17696	0.000388137	0.00537847	0.00454425	EXO1/RNASEH2A/FEN1/POP1/DGCR8/CPSF3/EDC3/APEX1/ENDOG/RNASEH2B	10
MF	GO:0016879	ligase activity, forming carbon-nitrogen bonds	8/764	44/17696	0.000518378	0.00703958	0.00594771	PAICS/MTHFD1/GMPS/CTPS2/PFAS/CAD/TTLL4/GART	8
MF	GO:0008408	3'-5' exonuclease activity	9/764	55/17696	0.000530957	0.00706902	0.00597258	POLE/EXOSC2/POLD1/XRN2/EXOSC9/CNOT1/CNOT6/APEX1/ERI2	9
MF	GO:0032356	oxidized DNA binding	4/764	10/17696	0.000587538	0.00767189	0.00648195	BLM/MSH6/MSH2/RECQL4	4
MF	GO:0008574	ATP-dependent microtubule motor activity, plus-end-directed	6/764	26/17696	0.000696192	0.00875397	0.0073962	KIF14/KIF11/KIF18A/KIF20B/KIF18B/DYNC1I1	6
MF	GO:0035925	mRNA 3'-UTR AU-rich region binding	6/764	26/17696	0.000696192	0.00875397	0.0073962	ILF3/HNRNPA0/ELAVL1/EXOSC8/HNRNPD/EXOSC9	6
MF	GO:0005049	nuclear export signal receptor activity	4/764	11/17696	0.000891824	0.0108134	0.00913617	CSE1L/XPO1/XPO5/RAN	4
MF	GO:0032404	mismatch repair complex binding	4/764	11/17696	0.000891824	0.0108134	0.00913617	PCNA/MCM8/MSH6/MSH2	4
MF	GO:0000287	magnesium ion binding	20/764	213/17696	0.000946364	0.0112734	0.00952481	TOP2A/PLK1/FEN1/GEN1/WEE1/SRPK1/MSH6/CDK2/FIGNL1/MSH2/IDH2/TDG/DUT/PRTFDC1/UBA2/DCTPP1/RAN/MTHFD2/NUDT5/ATP10B	20
MF	GO:0017091	AU-rich element binding	6/764	28/17696	0.00105841	0.0123907	0.0104688	ILF3/HNRNPA0/ELAVL1/EXOSC8/HNRNPD/EXOSC9	6
MF	GO:0008022	protein C-terminus binding	18/764	187/17696	0.00125805	0.0143841	0.012153	CENPF/MKI67/TOP2A/BRCA2/RAD51/CDC20/MAD2L1/TOPBP1/MSH2/CEP135/ITGB3BP/PPP1CC/SAE1/SCLT1/XRCC5/YEATS4/PHB2/EML2	18
MF	GO:0016889	endodeoxyribonuclease activity, producing 3'-phosphomonoesters	4/764	12/17696	0.00129224	0.0143841	0.012153	EME1/GEN1/XRCC3/RAD51C	4
MF	GO:1990825	sequence-specific mRNA binding	4/764	12/17696	0.00129224	0.0143841	0.012153	TYMS/DHFR/DHX9/SRSF3	4
MF	GO:0008301	DNA binding, bending	5/764	20/17696	0.00133561	0.0146271	0.0123584	TOP2A/HMGB2/HMGB3/HMGB1/TFAM	5
MF	GO:0140297	DNA-binding transcription factor binding	28/764	351/17696	0.00137834	0.0148555	0.0125513	PCNA/GMNN/BRCA1/NCAPG2/RBL1/RBBP8/HDAC2/PTMA/CBX5/NUP62/TCERG1/DHX33/EXOSC9/CNOT1/TRIM24/MTA1/PARP1/HMGB1/NPM1/KDM1A/PHB2/SMARCA4/APEX1/RAN/FUS/TCF3/BHLHE41/GABARAPL1	28
MF	GO:0016799	hydrolase activity, hydrolyzing N-glycosyl compounds	5/764	21/17696	0.00169133	0.0179439	0.0151607	NEIL3/PCNA/UNG/TDG/APEX1	5
MF	GO:0008296	3'-5'-exodeoxyribonuclease activity	4/764	13/17696	0.00180318	0.0184645	0.0156006	POLE/POLD1/APEX1/ERI2	4
MF	GO:0097617	annealing activity	4/764	13/17696	0.00180318	0.0184645	0.0156006	BLM/RAD54L/ZRANB3/RECQL4	4
MF	GO:0043021	ribonucleoprotein complex binding	14/764	133/17696	0.00183277	0.0184645	0.0156006	EZH2/SNRPA/UNG/SNRPB/DHX9/CBX5/DHX33/PHF6/SNRPD1/XPO5/NPM1/NVL/CPSF6/HNRNPU	14
MF	GO:0140142	nucleocytoplasmic carrier activity	6/764	31/17696	0.0018528	0.0184645	0.0156006	CSE1L/IPO5/KPNA2/XPO1/XPO5/RAN	6
MF	GO:0003724	RNA helicase activity	10/764	78/17696	0.00187636	0.0184645	0.0156006	BRIP1/RAD54B/FANCM/G3BP1/SNRNP200/DHX9/DHX33/DHX35/DHX15/DDX55	10
MF	GO:0031492	nucleosomal DNA binding	8/764	55/17696	0.00234713	0.0227672	0.0192359	CENPA/ACTL6A/RCC1/HDAC2/SMARCC1/HMGN1/SMARCA4/HMGN2	8
MF	GO:0008187	poly-pyrimidine tract binding	6/764	33/17696	0.00259028	0.0247718	0.0209296	PTBP1/U2AF2/RPS7/DAZAP1/MSI1/HNRNPU	6
MF	GO:0042054	histone methyltransferase activity	8/764	57/17696	0.00295378	0.0278242	0.0235085	SUV39H2/EZH2/PRMT1/DOT1L/SUV39H1/EHMT2/SUZ12/FBL	8
MF	GO:0042826	histone deacetylase binding	12/764	111/17696	0.00302913	0.0278242	0.0235085	TOP2A/CDC20/GMNN/HDAC2/CBX5/KPNA2/HNRNPD/PHF6/MTA1/PARP1/BCOR/BHLHE41	12
MF	GO:0000175	3'-5'-exoribonuclease activity	6/764	34/17696	0.00303239	0.0278242	0.0235085	EXOSC2/XRN2/EXOSC9/CNOT1/CNOT6/ERI2	6
MF	GO:0048027	mRNA 5'-UTR binding	5/764	25/17696	0.0038282	0.034658	0.0292824	IGF2BP3/SYNCRIP/RPS7/SHMT1/CCT5	5
MF	GO:0016874	ligase activity	14/764	145/17696	0.00406939	0.0355774	0.0300592	LIG1/PAICS/MTHFD1/DARS2/SAE1/MARS2/GMPS/CTPS2/PFAS/CAD/UBA2/TTLL4/LIG3/GART	14
MF	GO:0016896	exoribonuclease activity, producing 5'-phosphomonoesters	6/764	36/17696	0.00408241	0.0355774	0.0300592	EXOSC2/XRN2/EXOSC9/CNOT1/CNOT6/ERI2	6
MF	GO:0016888	endodeoxyribonuclease activity, producing 5'-phosphomonoesters	4/764	16/17696	0.00413934	0.0355774	0.0300592	EXO1/FEN1/DNA2/GEN1	4
MF	GO:0032183	SUMO binding	4/764	16/17696	0.00413934	0.0355774	0.0300592	TDG/CASP8AP2/UBA2/SERBP1	4
MF	GO:0042162	telomeric DNA binding	6/764	37/17696	0.00469807	0.0398749	0.0336901	BLM/HNRNPA1/HNRNPD/XRCC5/KDM1A/APEX1	6
MF	GO:0003725	double-stranded RNA binding	9/764	75/17696	0.00488313	0.0409339	0.0345849	ILF3/ILF2/DHX9/ELAVL1/DHX33/STRBP/DGCR8/DHX15/HNRNPU	9
MF	GO:0004532	exoribonuclease activity	6/764	38/17696	0.00537938	0.0445439	0.0376349	EXOSC2/XRN2/EXOSC9/CNOT1/CNOT6/ERI2	6
MF	GO:0051536	iron-sulfur cluster binding	8/764	63/17696	0.00552331	0.0446468	0.0377219	BRIP1/POLE/DNA2/POLA1/PRIM2/DDX11/POLD1/PPAT	8
MF	GO:0051540	metal cluster binding	8/764	63/17696	0.00552331	0.0446468	0.0377219	BRIP1/POLE/DNA2/POLA1/PRIM2/DDX11/POLD1/PPAT	8
MF	GO:0035064	methylated histone binding	8/764	65/17696	0.00667759	0.0527219	0.0445445	UHRF1/NCAPG2/MSH6/NCAPD3/CBX5/PHF19/CBX2/SUZ12	8
MF	GO:0140034	methylation-dependent protein binding	8/764	65/17696	0.00667759	0.0527219	0.0445445	UHRF1/NCAPG2/MSH6/NCAPD3/CBX5/PHF19/CBX2/SUZ12	8
MF	GO:0016884	carbon-nitrogen ligase activity, with glutamine as amido-N-donor	3/764	10/17696	0.00765929	0.0584343	0.0493709	GMPS/PFAS/CAD	3
MF	GO:0030957	Tat protein binding	3/764	10/17696	0.00765929	0.0584343	0.0493709	NPM1/SMARCA4/GABARAPL1	3
MF	GO:0046974	histone methyltransferase activity (H3-K9 specific)	3/764	10/17696	0.00765929	0.0584343	0.0493709	SUV39H2/SUV39H1/EHMT2	3

## Sheet: Supplymentary Table S2
Supplementary Table S2. KEGG analysis detailed results.
ID	Description	GeneRatio	BgRatio	pvalue	p.adjust	qvalue	Count
hsa04110	Cell cycle	45/386	124/8101	1.2523e-28	2.85525e-26	2.70234e-26	45
hsa03030	DNA replication	25/386	36/8101	1.55313e-25	1.77057e-23	1.67575e-23	25
hsa03440	Homologous recombination	19/386	41/8101	4.61096e-15	3.50433e-13	3.31665e-13	19
hsa03460	Fanconi anemia pathway	21/386	54/8101	1.24191e-14	7.07887e-13	6.69976e-13	21
hsa03410	Base excision repair	15/386	33/8101	5.35867e-12	2.44355e-10	2.31269e-10	15
hsa03430	Mismatch repair	12/386	23/8101	9.72565e-11	3.69575e-09	3.49782e-09	12
hsa05168	Herpes simplex virus 1 infection	56/386	498/8101	8.70999e-10	2.83697e-08	2.68504e-08	56
hsa04114	Oocyte meiosis	23/386	129/8101	3.26385e-08	9.30196e-07	8.80379e-07	23
hsa03040	Spliceosome	25/386	151/8101	3.8202e-08	9.67785e-07	9.15955e-07	25
hsa03420	Nucleotide excision repair	12/386	47/8101	1.3249e-06	3.02077e-05	2.859e-05	12
hsa03013	RNA transport	24/386	186/8101	7.43617e-06	0.000154132	0.000145877	24
hsa00670	One carbon pool by folate	7/386	20/8101	2.3866e-05	0.000453454	0.00042917	7
hsa04115	p53 signaling pathway	13/386	73/8101	3.39138e-05	0.000594795	0.000562941	13
hsa04218	Cellular senescence	20/386	156/8101	4.72852e-05	0.000770073	0.000728832	20
hsa00240	Pyrimidine metabolism	11/386	57/8101	6.34125e-05	0.00096387	0.00091225	11
hsa04914	Progesterone-mediated oocyte maturation	14/386	100/8101	0.000256353	0.00365302	0.00345739	14
hsa05166	Human T-cell leukemia virus 1 infection	21/386	219/8101	0.00171196	0.0229603	0.0217307	21
hsa03450	Non-homologous end-joining	4/386	13/8101	0.00257415	0.0326059	0.0308597	4
hsa01523	Antifolate resistance	6/386	31/8101	0.0030046	0.0360552	0.0341243	6
hsa05222	Small cell lung cancer	11/386	92/8101	0.00414991	0.0473089	0.0447753	11
